# Supplementary material for: Challenges in measuring nanoparticles and microparticles by single particle ICP-QMS and ICP-TOFMS: size-dependent transport efficiency and limited linear dynamic range
Source: Royal Society of Chemistry journal article supplement (doi:10.1039/d4ja00425f), 2025-01-01
Supplement: d4ja00425f2.xlsx [file d4ja00425f2.xlsx]

## Sheet: _xltb_storage_
XL Toolbox Settings
	export_preset	<?xml version="1.0" encoding="utf-16"?>_x000D_ <Preset xmlns:xsd="http://www.w3.org/2001/XMLSchema" xmlns:xsi="http://www.w3.org/2001/XMLSchema-instance">_x000D_ <Name>Tiff, 600 dpi, RGB, White canvas</Name>_x000D_ <Dpi>600</Dpi>_x000D_ <FileType>Tiff</FileType>_x000D_ <ColorSpace>Rgb</ColorSpace>_x000D_ <Transparency>WhiteCanvas</Transparency>_x000D_ <UseColorProfile>false</UseColorProfile>_x000…
	export_path	D:\MyFilesCF\Papers\2024 JAAS Linearity and Transport Eff\Hi Res Figures\Fig 1 16pt.tif

## Sheet: Analog summary
Au particles			Detector	Sensitivity	Particle size (nm)	Particle mass (fg)	# detected particles	Avg. int. (counts)	Avg. int. (counts/s)	Meas. Time (min)	NP# TE	NP# TE used in plot	# particles % RSD	Intensity RSD	# particles % RSD	Notes
Data location			Analog	Normal	60	2.18271	654.25	129.722	1.29722e+06	0.5	0.211048	0.211048	0.00754582	2.22567
C:\Users\lomax-vogt.2\The Ohio State University\Nanoparticles NSF - General\Engineered NP measurements\Engineered Au NPs\2023 12 18 Au NPs reduced normal pulse analog\2023 12 18			Analog	Normal	80	5.17384	647	339.137	3.39137e+06	0.5	0.20871	0.20871	0.00798139	16.0436
			Analog	Normal	150	34.1049	655.333	2654.62	2.65462e+07	0.5	0.211398	0.211398	0.0133273	43.071
Conditions			Analog	Normal	200	80.8413	336.667	6233.05	6.23305e+07	0.5	0.108602		0.00851715	221.039		Note from LC in sample prep: Portion of stock agglomerated to walls of original undiluted container
Uptake rate (mL/min)	0.062		Analog	Normal	500	1263.14	58.3333	1.33793e+08	1.33793e+12	0.5	0.0188172		0	4.22275e+07		Detector saturation
NP susp. conc. (NP/mL)	100000							70.0121
			Detector	Sensitivity	Particle size (nm)	Particle mass (fg)	# detected particles	Avg. int. (counts)	Avg. int. (counts/s)	Meas. Time (min)	NP# TE	NP# TE used in plot	# particles % RSD	Intensity RSD
			Analog	Reduced	60	2.18271	71	17.5408	175408	0.5	0.0229032		0.0422535	37.3993		Too close to threshold
			Analog	Reduced	80	5.17384	446.667	28.096	280960	0.5	0.144086		0.041402	3.88021		Too close to threshold
			Analog	Reduced	150	34.1049	618.333	186.564	1.86564e+06	0.5	0.199462		0.0392014	14.9385
			Analog	Reduced	200	80.8413	272.333	496.307	4.96307e+06	0.5	0.0878495		0.0328887	15.8739		Note from LC in sample prep: Portion of stock agglomerated to walls of container
			Analog	Reduced	500	1263.14	70	10271.6	9.46632e+07	0.5	0.0225806		0.0714286	39.2106
			Analog	Reduced	1000	10105.2	591.75	24634.7	2.4125e+08	1.66667	0.0572661	0.0572661	0.00598843	916.507
			Analog	Reduced	1500	34104.9	332.5	58311.5	5.34905e+08	1.66667	0.0321774	0.0321774	0.00304839	957.786
SiO2 particles			Detector	Sensitivity	Particle size (nm)	Particle mass (fg)	# detected particles	Avg. int. (counts)	Avg. int. (counts/s)	Meas. Time (min)	NP# TE	NP# TE used in plot	# particles % RSD	Intensity RSD
Data location			Analog	Normal	480	115.808	278	136.959	136959	0.5	0.0896774		0.687988	82.0572		Too close to threshold
C:\Users\lomax-vogt.2\The Ohio State University\Nanoparticles NSF - General\Engineered NP measurements\Engineered SiO2 NPs\2023 12 19 SiO2 normal and reduced sensitivity			Analog	Normal	690	344.004	388	540.431	540431	0.5	0.125161	0.125161	0.00299149	6.95799
			Analog	Normal	730	407.366	314.333	753.043	753043	0.5	0.101398	0.101398	0.00184996	6.68378
			Analog	Normal	895	750.732	299.333	1209.63	1.20963e+06	0.5	0.0965591	0.0965591	0.00135159	28.6539
			Analog	Normal	990	1016.06	142	1915.9	1.9159e+06	0.5	0.0458065	0.0458065	0.0018437	4.14833
			Analog	Normal	1050	1212.23	305.333	1722.48	1.72248e+06	0.5	0.0984946		0.0319031	12.5786		Too high, problem with stock?
			Analog	Normal	1570	4458	161.333	6132.44	6.13244e+06	0.5	0.052043	0.052043	0.000997163	29.9951							Figures used for JAAS paper
			Analog	Normal	2060	9154.14	154.667	10732.1	1.07321e+07	0.5	0.0498925	0.0498925	0.00237535	269.484
			Analog	Normal	3170	33357.5	138.333	27670.1	2.76701e+07	0.5	0.0446237	0.0446237	0.00197686	710.23
			Detector	Sensitivity	Particle size (nm)	Particle mass (fg)	# detected particles	Avg. int. (counts)	Avg. int. (counts/s)	Meas. Time (min)	NP# TE	NP# TE used in plot	# particles % RSD	Intensity RSD
			Analog	Reduced	480	115.808	11	22.6404	22640.4	0.5	0.00354839		0.181818	0.730225		Too close to threshold
			Analog	Reduced	690	344.004	301.333	35.9709	35970.9	0.5	0.0972043	0.0972043	0.0413305	1.42781
			Analog	Reduced	730	448	337	47.8848	47884.8	0.5	0.10871	0.10871	0.032165	1.66342
			Analog	Reduced	895	750.732	330	74.4391	74439.1	0.5	0.106452	0.106452	0.0528013	0.376259
			Analog	Reduced	990	1016.06	170.333	109.244	109244	0.5	0.0549462	0.0549462	0.0383516	0.682725
			Analog	Reduced	1050	1212.23	322.667	103.729	103729	0.5	0.104086		0.0127364	2.18801		Too high, problem with stock?
			Analog	Reduced	1570	4458	182	370.195	370195	0.5	0.0587097	0.0587097	0.0505574	3.37833
			Analog	Reduced	2060	9154.14	169.333	673.301	673301	0.5	0.0546237	0.0546237	0.120288	8.45341
			Analog	Reduced	3170	33357.5	150.333	1788.4	1.7884e+06	0.5	0.0484946	0.0484946	0.10049	29.408
			2023 09 30 data (uptake rate=27 uL/min)
			Detector	Sensitivity	Particle size (nm)	Particle mass (fg)	# detected particles	Avg. int. (counts)	Avg. int. (counts/s)	Meas. Time (min)	NP# TE	% RSD
			Analog	Normal	60	2.18271					0.313556	0.0391221
			Analog	Normal	100	10.1052					0.320952	0.0226345
			Analog	Normal	200	80.8413					0.3	0.0440287
			Analog	Normal	480	115.808					0.299481	0.0201577
			Analog	Normal	730	448					0.283926	0.0182442
			Analog	Normal	990	1016.06					0.177185	0.00860535
			Analog	Normal	1570	4458					0.0985185	0.00913427
			Analog	Normal	2060	9154.14					0.0756889	0.00390656
			Analog	Normal	3170	33357.5					0.039037	0.0037288
Polystyrene particles			2023 09 30 data (uptake rate=27 uL/min)
			Analog	Sensitivity	Particle size (nm)	Particle mass (fg)	# detected particles	Avg. int. (counts)	Avg. int. (counts/s)	Meas. Time (min)	NP# TE	% RSD
			Polystyrene (C8H8)n	Normal	2070	4876.25	839.5				0.186556	0.0086944
			Polystyrene (C8H8)n	Normal	5150	75092.5	73				0.0162222	0.000628539

## Sheet: Pulse summary
Au particles			Detector	Sensitivity	Particle size (nm)	Particle mass (fg)	# detected particles	Avg. int. (counts)	Avg. int. (counts/s)	Meas. Time (min)	NP# TE	NP# TE used in plot	Notes				Detector	Sensitivity	Particle size (nm)	Particle mass (fg)	# detected particles	Avg. int. (counts)	Avg. int. (counts/s)	Meas. Time (s)	NP# TE
Data location			Analog	Normal	60	2.18271	654.25	129.722	1.29722e+06	0.5	0.211048	0.211048					Pulse	Normal	60	2.18271	584.333	129.779	1.29779e+06	0.5	0.188495
C:\Users\lomax-vogt.2\The Ohio State University\Nanoparticles NSF - General\Engineered NP measurements\Engineered Au NPs\2023 12 18 Au NPs reduced normal pulse analog\2023 12 18			Analog	Normal	80	5.17384	647	339.137	3.39137e+06	0.5	0.20871	0.20871					Pulse	Normal	80	5.17384	631.333	260.609	2.60609e+06	0.5	0.203656
			Analog	Normal	150	34.1049	655.333	2654.62	2.65462e+07	0.5	0.211398	0.211398					Pulse	Normal	150	34.1049	645	2478.75	2.47875e+07	0.5	0.208065
Conditions			Analog	Normal	200	80.8413	336.667	6233.05	6.23305e+07	0.5	0.108602		Note from LC in sample prep: Portion of stock agglomerated to walls of container				Pulse	Normal	200	80.8413	327.333	134.162	1.34162e+06	0.5	0.105591
Uptake rate (mL/min)	0.062		Analog	Normal	500	1263.14	58.3333	1.33793e+08	1.33793e+12	0.5	0.0188172	0.0188172					Pulse	Normal	500	1263.14	67.6667	147.47	1.4747e+06	0.5	0.021828
NP susp. conc. (NP/mL)	100000
			Detector	Sensitivity	Particle size (nm)	Particle mass (fg)	# detected particles	Avg. int. (counts)	Avg. int. (counts/s)	Meas. Time (min)	NP# TE	NP# TE used in plot					Detector	Sensitivity	Particle size (nm)	Particle mass (fg)	# detected particles	Avg. int. (counts)	Avg. int. (counts/s)	Meas. Time (s)	NP# TE
			Analog	Reduced	60	2.18271	71	17.5408	175408	0.5	0.0229032		Too close to threshold				Pulse	Reduced	60	2.18271	61	17.264	172640	0.5	0.0196774
			Analog	Reduced	80	5.17384	446.667	28.096	280960	0.5	0.144086		Too close to threshold				Pulse	Reduced	80	5.17384	480.333	27.8666	278666	0.5	0.154946
			Analog	Reduced	150	34.1049	618.333	186.564	1.86564e+06	0.5	0.199462	0.199462					Pulse	Reduced	150	34.1049	567.333	188.469	1.88469e+06	0.5	0.183011
			Analog	Reduced	200	80.8413	272.333	496.307	4.96307e+06	0.5	0.0878495		Note from LC in sample prep: Portion of stock agglomerated to walls of container				Pulse	Reduced	200	80.8413	315	239.273	2.39273e+06	0.5	0.101613
			Analog	Reduced	500	1263.14	75.3333	9466.32	9.46632e+07	0.5	0.0243011	0.0243011					Pulse	Reduced	500	1263.14	49.6667	96.8694	968694	0.5	0.0160215	Pulse saturation
			Analog	Reduced	1000	10105.2	264.889	24125	2.4125e+08	1.66667	0.0256344	0.0256344
			Analog	Reduced	1500	34104.9	241.556	53490.5	5.34905e+08	1.66667	0.0233763	0.0233763
SiO2 particles			Detector	Sensitivity	Particle size (nm)	Particle mass (fg)	# detected particles	Avg. int. (counts)	Avg. int. (counts/s)	Meas. Time (min)	NP# TE	NP# TE used in plot
Data location			Analog	Normal	480	115.808	278	136.959	136959	0.5	0.0896774		Too close to threshold
C:\Users\lomax-vogt.2\The Ohio State University\Nanoparticles NSF - General\Engineered NP measurements\Engineered SiO2 NPs\2023 12 19 SiO2 normal and reduced sensitivity			Analog	Normal	690	344.004	388	540.431	540431	0.5	0.125161	0.125161
			Analog	Normal	730	407.366	314.333	753.043	753043	0.5	0.101398	0.101398
			Analog	Normal	895	750.732	299.333	1209.63	1.20963e+06	0.5	0.0965591	0.0965591
			Analog	Normal	990	1016.06	142	1915.9	1.9159e+06	0.5	0.0458065	0.0458065
			Analog	Normal	1050	1212.23	305.333	1722.48	1.72248e+06	0.5	0.0984946		Too high, problem with stock?
			Analog	Normal	1570	4052.42	161.333	6132.44	6.13244e+06	0.5	0.052043	0.052043
			Analog	Normal	2060	9154.14	154.667	10732.1	1.07321e+07	0.5	0.0498925	0.0498925
			Analog	Normal	3170	33357.5	138.333	27670.1	2.76701e+07	0.5	0.0446237	0.0446237
			Detector	Sensitivity	Particle size (nm)	Particle mass (fg)	# detected particles	Avg. int. (counts)	Avg. int. (counts/s)	Meas. Time (min)	NP# TE
			Analog	Normal	480	115.808	11	22.6404	22640.4	0.5	0.00354839		Too close to threshold
			Analog	Normal	690	344.004	301.333	35.9709	35970.9	0.5	0.0972043	0.0972043
			Analog	Normal	730	407.366	337	47.8848	47884.8	0.5	0.10871	0.10871
			Analog	Normal	895	750.732	330	74.4391	74439.1	0.5	0.106452	0.106452
			Analog	Normal	990	1016.06	170.333	109.244	109244	0.5	0.0549462	0.0549462
			Analog	Normal	1050	1212.23	322.667	103.729	103729	0.5	0.104086		Too high, problem with stock?
			Analog	Normal	1570	4052.42	182	370.195	370195	0.5	0.0587097	0.0587097
			Analog	Normal	2060	9154.14	169.333	673.301	673301	0.5	0.0546237	0.0546237
			Analog	Normal	3170	33357.5	150.333	1788.4	1.7884e+06	0.5	0.0484946	0.0484946
			2023 09 30 data (uptake rate=27 uL/min)
			Detector	Sensitivity	Particle size (nm)	Particle mass (fg)	# detected particles	Avg. int. (counts)	Avg. int. (counts/s)	Meas. Time (min)	NP# TE
			Analog	Normal	60	2.18271					0.313556
			Analog	Normal	100	10.1052					0.320952
			Analog	Normal	200	80.8413					0.3
			Analog	Normal	480	115.808					0.299481
			Analog	Normal	730	407.366					0.283926
			Analog	Normal	990	1016.06					0.177185
			Analog	Normal	1570	4052.42					0.0985185
			Analog	Normal	2060	9154.14					0.0756889
			Analog	Normal	3170	33357.5					0.039037

## Sheet: Au Matlab stats
stats	Detector	Sensitivity	# particles	Avg. int.	Bkgd	Threshold	# particles %RSD	Avg. int. %RSD
100 nm Au	Analog	Reduced	138	67.6063	0.00136581	2.86446
100 nm Au	Analog	Reduced	139	76.1823	0.00131899	2.86109
100 nm Au	Analog	Reduced	151	75.4427	0.00125909	2.8555
			142.667	73.0771			0.041402	3.88021
100 nm Au	Pulse	Reduced	168	60.9828	0.00149978	2.87389
100 nm Au	Pulse	Reduced	150	67.0878	0.00140258	2.86487
100 nm Au	Pulse	Reduced	141	72.4387	0.00129242	2.85899
			153	66.8364			0.0733658	4.68025
100 nm Au	Pulse	Normal	147	191.618	0.0109781	3.11556
100 nm Au	Pulse	Normal	157	209.709	0.00623521	3.03362
100 nm Au	Pulse	Normal	131	222.503	0.00623716	3.02506
			145	207.943			0.07385	12.6705
100 nm Au	Analog	Normal	140	906.799	0.0105161	3.11526
100 nm Au	Analog	Normal	143	945.585	0.00628918	3.02667
100 nm Au	Analog	Normal	153	920.712	0.00633779	3.02951
			145.333	924.365			0.0382416	16.0436
1000 nm Au	Analog	Reduced			0.00221611	2.90397			100s measurement time		448	25538.2
1000 nm Au	Analog	Reduced			0.00114601	2.8433			100s measurement time		120	19954
1000 nm Au	Analog	Reduced	568	23495.6	0.0014669	2.86174			100s measurement time
1000 nm Au	Analog	Reduced	506	24603.8	0.00141219	2.85854			100s measurement time
1000 nm Au	Analog	Reduced	673	26049.5	0.00153712	2.86639			100s measurement time
1000 nm Au	Analog	Reduced			0.00165698	2.87308			100s measurement time		713	25360.8
1000 nm Au	Analog	Reduced			0.00138024	2.85595			100s measurement time		400	23309.6
1000 nm Au	Analog	Reduced	620	24390.1	0.00146232	2.86257			100s measurement time
1000 nm Au	Analog	Reduced			0.00134033	2.85455			100s measurement time		136	24423.6
			591.75	24634.7			0.104572	916.507
1000 nm Au	Pulse	Reduced	133	93.4541	0.00120122	2.85059			100s measurement time
1000 nm Au	Pulse	Reduced	155	89.4664	0.00137183	2.8577			100s measurement time
1000 nm Au	Pulse	Reduced	163	93.9497	0.00133846	2.85254			100s measurement time
			150.333	92.2901			0.0843738	2.00684
150 nm Au	Analog	Normal	603	2596.66	0.0122038	3.19544
150 nm Au	Analog	Normal	659	2667.38	0.0135374	3.22925
150 nm Au	Analog	Normal	704	2699.82	0.0138834	3.23272
			655.333	2654.62			0.0630435	43.071
150 nm Au	Analog	Reduced	651	166.279	0.0056187	3.06862
150 nm Au	Analog	Reduced	611	191.593	0.00528184	3.05579
150 nm Au	Analog	Reduced	593	201.819	0.00492275	3.04454
			618.333	186.564			0.0392014	14.9385
150 nm Au	Pulse	Normal	655	2420.66	0.0123114	3.20785
150 nm Au	Pulse	Normal	637	2491.28	0.012556	3.20698
150 nm Au	Pulse	Normal	643	2524.31	0.0119509	3.18894
			645	2478.75			0.011602	43.2299
150 nm Au	Pulse	Reduced	581	181.93	0.00497732	3.0462
150 nm Au	Pulse	Reduced	547	191.894	0.0048229	3.03672
150 nm Au	Pulse	Reduced	574	191.583	0.00469951	3.03413
			567.333	188.469			0.0258386	4.62534
1500 nm Au	analog	reduced			0.00179612	2.87427			100s measurement time			484	58393.2
1500 nm Au	analog	reduced			0.00116403	2.84137			100s measurement time			151	59192.1
1500 nm Au	analog	reduced	364	59269.2	0.00137897	2.85444			100s measurement time
1500 nm Au	analog	reduced			0.00164094	2.86897			100s measurement time			510	59751.2
1500 nm Au	analog	reduced			0.00107976	2.83631			100s measurement time			120	51926.4
1500 nm Au	analog	reduced	301	57353.7	0.00121916	2.84537			100s measurement time
1500 nm Au	analog	reduced			0.0010034	2.83083			100s measurement time			64	49498.7
1500 nm Au	analog	reduced			0.00109685	2.83796			100s measurement time			132	50360.2
1500 nm Au	analog	reduced			0.00101428	2.83157			100s measurement time			48	35670.2
			332.5	58311.5			0.0947368	957.786
200 nm Au	Analog	Normal	333	6203.44	0.00753908	3.0742
200 nm Au	Analog	Normal	337	5978.36	0.00832781	3.09633
200 nm Au	Analog	Normal	340	6517.35	0.00864793	3.10067
			336.667	6233.05			0.00851715	221.039
200 nm Au	Analog	Reduced	260	478.569	0.00162377	2.87513
200 nm Au	Analog	Reduced	281	493.26	0.00151698	2.87122
200 nm Au	Analog	Reduced	276	517.092	0.00168801	2.87906
			272.333	496.307			0.0328887	15.8739
200 nm Au	Pulse	Normal	313	133.202	0.00807942	3.08184
200 nm Au	Pulse	Normal	327	135.836	0.00792381	3.08161
200 nm Au	Pulse	Normal	342	133.448	0.0087766	3.09755
			327.333	134.162			0.0361758	1.18784
200 nm Au	Pulse	Reduced	292	235.855	0.00164025	2.88284
200 nm Au	Pulse	Reduced	352	242.247	0.002165	2.90728
200 nm Au	Pulse	Reduced	301	239.717	0.00198538	2.89727
			315	239.273			0.083872	2.6281
500 nm Au	Analog	Normal	54	1.09214e+08	0.00783731	3.04038
500 nm Au	Analog	Normal			0.00844367	3.05605			60	9.84948e+07
500 nm Au	Analog	Normal	61	1.93669e+08	0.00874773	3.06202
			57.5	1.51441e+08			0.0608696	4.22275e+07
500 nm Au	Analog	Reduced			0.000898125	2.83187			86	7855.81
500 nm Au	Analog	Reduced	75	10232.4	0.000961372	2.83273
500 nm Au	Analog	Reduced	65	10310.8	0.0010313	2.83737
			70	10271.6			0.0714286	39.2106
500 nm Au	Pulse	Normal	57	142.658	0.00691353	3.02264
500 nm Au	Pulse	Normal	64	152.505	0.0077916	3.04069
500 nm Au	Pulse	Normal	82	147.247	0.00810665	3.04644
			67.6667	147.47			0.155621	4.02343
500 nm Au	Pulse	Reduced	46	98.3397	0.000783644	2.82324
500 nm Au	Pulse	Reduced	57	96.9301	0.000973801	2.83204
500 nm Au	Pulse	Reduced	46	95.3385	0.00157398	2.86057
			49.6667	96.8694			0.104405	1.226
60 nm Au	Analog	Reduced check	68	16.9244	0.00852757	3.16151
60 nm Au	Analog	Reduced check	74	18.1571	0.00773619	3.13786
			71	17.5408			0.0422535	37.3993
60 nm Au	Pulse	Reduced	59	17.8835	0.00834263	3.14858
60 nm Au	Pulse	Reduced	60	16.8347	0.00911621	3.17165
60 nm Au	Pulse	Reduced	64	17.074	0.00910121	3.17017
			61	17.264			0.0354139	0.44876
60 nm Au	Pulse	Normal	583	127.738	0.010219	3.16387
60 nm Au	Pulse	Normal	591	129.887	0.00977124	3.14601
60 nm Au	Pulse	Normal	579	131.713	0.0104896	3.16511
			584.333	129.779			0.00853772	1.6249
60 nm Au	Analog	Normal	692	130.529	0.0139939	3.22617
60 nm Au	Analog	Normal	654	127.783	0.0132467	3.21554
60 nm Au	Analog	Normal	630	127.572	0.012743	3.20353
60 nm Au	Analog	Normal	641	133.005	0.0138412	3.22018
			654.25	129.722			0.035754	2.22567
60 nm Au	Analog		2099	138.609	0.0135237	3.21026	100 s
80 nm Au	Analog	Reduced	409	26.0006	0.00930243	3.17028
80 nm Au	Analog	Reduced	463	28.439	0.00923934	3.17328
80 nm Au	Analog	Reduced	468	29.8485	0.0107161	3.20357
			446.667	28.096
80 nm Au	Pulse	Reduced	426	26.3956	0.0102845	3.20349
80 nm Au	Pulse	Reduced	505	29.1157	0.0104346	3.20669
80 nm Au	Pulse	Reduced	510	28.0885	0.00885947	3.16662
			480.333	27.8666
80nm Au	Analog	Normal	729	328.883	0.0179987	3.28024
80nm Au	Analog	Normal	740	343.839	0.0170319	3.27269
80nm Au	Analog	Normal	772	344.69	0.0171249	3.27425
			747	339.137
80nm Au	Pulse	Normal	738	257.06	0.0164213	3.26591
80nm Au	Pulse	Normal	748	265.687	0.0173365	3.27941
80nm Au	Pulse	Normal	708	259.08	0.0171111	3.27038
			731.333	260.609
730 nm SiO2	Dual	Normal	257	625.576	2.87097	11.6797
730 nm SiO2	Dual	Normal	237	641.796	2.9043	11.7466
730 nm SiO2	Dual	Normal	247	671.852	2.99248	11.8699
730 nm SiO2	Pulse	Normal	198	158.183	2.95418	11.8041
730 nm SiO2	Pulse	Normal	207	167.363	3.01155	11.9389
730 nm SiO2	Pulse	Normal	216	172.409	3.03045	11.9698

## Sheet: SiO2 Matlab stats
stats_column1	summaryArray_stats_1	summaryArray_stats_2		Std dev	Bkgd (counts)	Threshold (counts)				NP	# particles	Average intensity (counts)	Std dev
480 nm Si_Analog_Normal	399	191.633			5.80273	17.3725				480	403	195.746	0.0451222	2.93357
480 nm Si_Analog_Normal_1	383	197.338			5.85113	17.4714				690	388	540.431	0.0239011	6.95799
480 nm Si_Analog_Normal_2	427	198.269			5.93213	17.6041				730	314.333	753.043	0.0182446	6.68378
	403	195.746	0.0451222	2.93357						895	299.333	1209.63	0.0139976	28.6539
690 nm Si_Analog _Normal	380	531.206			6.06685	17.8443				990	142	1915.9	0.0402498	4.14833
690 nm Si_Analog _Normal_1	383	542.077			6.18094	18.0577				1050	305.333	1722.48	0.0319031	12.5786
690 nm Si_Analog _Normal_2	401	548.009			6.19926	18.0677				1570	161.333	6132.44	0.0191604	29.9951
	388	540.431	0.0239011	6.95799						2060	154.667	10732.1	0.0476093	269.484
730 nm Si_Analog _Normal	321	747.886			6.03763	17.8214				3170	138.333	27670.1	0.0443007	710.23
730 nm Si_Analog _Normal_1	307	748.761			6.21606	18.1196
730 nm Si_Analog _Normal_2	315	762.482			6.23235	18.124
	314.333	753.043	0.0182446	6.68378
895 nm Si_Analog _Normal	298	1172.32			6.08141	17.8683
895 nm Si_Analog _Normal_1	305	1241.97			6.19882	18.0972
895 nm Si_Analog _Normal_2	295	1214.61			6.23822	18.1408
	299.333	1209.63	0.0139976	28.6539
990 nm Si_Analog _Normal	145	1921.77			5.82538	17.3421
990 nm Si_Analog _Normal_1	147	1913.13			5.91548	17.5349
990 nm Si_Analog _Normal_2	134	1912.81			5.91761	17.5397
	142	1915.9	0.0402498	4.14833
1050 nm Si_Analog _Normal	297	1709.43			5.54543	16.8945
1050 nm Si_Analog _Normal_1	319	1739.48			5.70441	17.1735
1050 nm Si_Analog _Normal_2	300	1718.54			5.72638	17.2642
	305.333	1722.48	0.0319031	12.5786
1570 nm Si_Analog _Normal	157	6122.91			5.49321	16.7411
1570 nm Si_Analog _Normal_1	163	6101.4			5.56829	16.879
1570 nm Si_Analog _Normal_2	164	6173			5.55144	16.8447
	161.333	6132.44	0.0191604	29.9951
2060 nm Si_Analog _Normal	154	10413.7			5.37415	16.5137
2060 nm Si_Analog _Normal_1	146	11072.7			5.46506	16.687
2060 nm Si_Analog _Normal_2	164	10710.1			5.4874	16.7499
	154.667	10732.1	0.0476093	269.484
3170 nm Si_Analog _Normal	131	27957.1			5.35235	16.5793
3170 nm Si_Analog _Normal_1	138	26693			5.357	16.5742
3170 nm Si_Analog _Normal_2	146	28360.1			5.3775	16.6289
	138.333	27670.1	0.0443007	710.23
60 nm Au_Analog_Normal	669	136.793	0.0148341	3.23559
80 nm Au_Analog_Normal	749	356.055	0.0451953	3.57352
80 nm Au_Analog_Normal_1	780	361.047	0.0274641	3.3949
80 nm Au_Analog_Normal_2	763	372.698	0.0294461	3.41539

## Sheet: Sort
Detector	Sensitivity	Particle size (nm)	Particle mass (fg)	# detected particles	Avg. int. (counts)	Avg. int. (counts/s)		# particle % RSD	Intensity RSD			Au density	19.3	g/cm3
Analog	Normal	60	2.18271	654.25	129.722	1.29722e+06		0.035754	2.22567
Pulse	Normal	60	2.18271	584.333	129.779	1.29779e+06		0.00853772	1.6249
Analog	Reduced	60	2.18271	71	17.5408	175408		0.0422535	37.3993
Pulse	Reduced	60	2.18271	61	17.264	172640		0.0354139	0.44876
Analog	Normal	80	5.17384	747	339.137	3.39137e+06		0	0
Pulse	Normal	80	5.17384	731.333	260.609	2.60609e+06		0	0
Analog	Reduced	80	5.17384	446.667	28.096	280960		0	0
Pulse	Reduced	80	5.17384	480.333	27.8666	278666		0	0
Analog	Normal	100	10.1052	145.333	924.365	9.24365e+06		0.0382416	16.0436
Pulse	Normal	100	10.1052	145	207.943	2.07943e+06		0.07385	12.6705
Analog	Reduced	100	10.1052	142.667	73.0771	730771		0.041402	3.88021
Pulse	Reduced	100	10.1052	153	66.8364	668364		0.0733658	4.68025
Analog	Normal	150	34.1049	655.333	2654.62	2.65462e+07		0.0630435	43.071
Pulse	Normal	150	34.1049	645	2478.75	2.47875e+07		0.011602	43.2299
Analog	Reduced	150	34.1049	618.333	186.564	1.86564e+06		0.0392014	14.9385
Pulse	Reduced	150	34.1049	567.333	188.469	1.88469e+06		0.0258386	4.62534
Analog	Normal	200	80.8413	336.667	6233.05	6.23305e+07		0.00851715	221.039
Pulse	Normal	200	80.8413	327.333	134.162	1.34162e+06		0.0361758	1.18784
Analog	Reduced	200	80.8413	272.333	496.307	4.96307e+06		0.0328887	15.8739
Pulse	Reduced	200	80.8413	315	239.273	2.39273e+06		0.083872	2.6281
Analog	Normal	500	1263.14	57.5	1.51441e+08	1.51441e+12		0.0608696	4.22275e+07
Pulse	Normal	500	1263.14	67.6667	147.47	1.4747e+06		0.155621	4.02343
Analog	Reduced	500	1263.14	70	10271.6	1.02716e+08		0.0714286	39.2106
Pulse	Reduced	500	1263.14	49.6667	96.8694	968694		0.104405	1.226
Analog	Reduced	1000	10105.2	591.75	24634.7	2.46347e+08		0.104572	916.507		100 s meas time
Analog	Reduced	1500	34104.9	332.5	58311.5	5.83115e+08		0.0947368	957.786		100 s meas time

## Sheet: Sheet2
Detector	Sensitivity	Particle size (nm)	Particle mass (fg)	# detected particles	Avg. int. (counts)	Avg. int. (counts/s)		# particle % RSD	Intensity RSD
Analog	Normal	60	2.18271	654.25	129.722	1.29722e+06		0.035754	2.22567
Analog	Normal	100	10.1052	145.333	924.365	9.24365e+06		0.0382416	16.0436
Analog	Normal	150	34.1049	655.333	2654.62	2.65462e+07		0.0630435	43.071
Analog	Normal	200	80.8413	336.667	6233.05	6.23305e+07		0.00851715	221.039
Analog	Normal	500	1263.14	58.3333	1.33793e+08	1.33793e+12		0.0529921	4.22275e+07
Detector	Sensitivity	Particle size (nm)	Particle mass (fg)	# detected particles	Avg. int. (counts)	Avg. int. (counts/s)		# particle % RSD	Intensity RSD
Analog	Reduced	60	2.18271	71	17.5408	175408		0.0422535	37.3993
Analog	Reduced	100	10.1052	142.667	73.0771	730771		0.041402	3.88021
Analog	Reduced	150	34.1049	618.333	186.564	1.86564e+06		0.0392014	14.9385
Analog	Reduced	200	80.8413	272.333	496.307	4.96307e+06		0.0328887	15.8739
Analog	Reduced	500	1263.14	75.3333	9466.32	9.46632e+07		0.113847	1139.25
Analog	Reduced	1000	10105.2	464.889	24125	2.4125e+08		0.437829	1702.1
Analog	Reduced	1500	34104.9	241.556	53490.5	5.34905e+08		0.694561	7377.17
Detector	Sensitivity	Particle size (nm)	Particle mass (fg)	# detected particles	Avg. int. (counts)	Avg. int. (counts/s)		# particle % RSD	Intensity RSD
Pulse	Normal	60	2.18271	584.333	129.779	1.29779e+06		0.00853772	1.6249
Pulse	Reduced	60	2.18271	61	17.264	172640		0.0354139	0.44876
Pulse	Normal	100	10.1052	145	207.943	2.07943e+06		0.07385	12.6705
Pulse	Reduced	100	10.1052	153	66.8364	668364		0.0733658	4.68025
Pulse	Normal	150	34.1049	645	2478.75	2.47875e+07		0.011602	43.2299
Pulse	Reduced	150	34.1049	567.333	188.469	1.88469e+06		0.0258386	4.62534
Pulse	Normal	200	80.8413	327.333	134.162	1.34162e+06		0.0361758	1.18784
Pulse	Reduced	200	80.8413	315	239.273	2.39273e+06		0.083872	2.6281
Pulse	Normal	500	1263.14	67.6667	147.47	1.4747e+06		0.155621	4.02343
Pulse	Reduced	500	1263.14	49.6667	96.8694	968694		0.104405	1.226
