# Supplementary material for: Challenges in measuring nanoparticles and microparticles by single particle ICP-QMS and ICP-TOFMS: size-dependent transport efficiency and limited linear dynamic range
Source: Royal Society of Chemistry journal article supplement (doi:10.1039/d4ja00425f), 2025-01-01
Supplement: d4ja00425f3.xlsx [file d4ja00425f3.xlsx]

## Sheet: Info
Summary
Engineered SiO2 particles were measured using optimized sensitivity (1x), somewhat reduced sensitivity (13x), and highly reduced sensitivity (269x) to determine the upper and lower linear dynamic ranges of particles with sizes between 500 nm and 3170 nm. All SiO2 particles were measured with the detector set to "dual" detection. 60 nm to 1500 nm Au particles were measured using optimized sensitiv…
Date measured	2022-11-18	2023-12-19
Instrument	NexION	NexION
Uptake rate (mL/min)	0.065	0.062
Pump or free aspirated	Free aspirated	Free aspirated
Sample introduction system (used 11/08/22 and 12/19/23)
Nebulizer	PFA-50 PFA Nebulizer without Probe (Part No.: ES-2000).
Spray chamber	ESI 47mm PFA (barrel) spray chamber with O-ring-free PFA endcap for NexION 300/350 (Part No.: ES-2184-5472)
Injector	1.8 mm i.d. Meinhard Sapphire Injector for Thermo iCAP ICPMS (Part No.: I73-S18)
Tuning	2022-11-18	2023-12-19
Neb gas flow rate (L/min)	1.02	1.05
115QID (V)	-15	-15.5
60 nm Au NP# TE	2022-11-08	2023-12-19
Transport efficiency	0.154244	0.216129
# particles	4261	670
Uptake rate	0.065	0.062	mL/min
Measurement time	1.7	0.5	mins
#/mL in stock	250000	100000
Stock supplier	BBI, 60 nm citrate coated	Nancomposix, 60 nm citrate coated
QMS Si resolution DAC values	2022-11-18	2023-12-19
0.7	2070	2070
0.5	2085	2085
0.2	2110	2110
QMS Au resolution DAC values	2023-12-19
0.7	2086
0.3	2130
Particle standards
Size (nm)	Composition	Supplier	#/mL in suspension	Date measured	Date made
Au	60	Nanocomposix	240000	2022-11-18	2022-11-08	May need to recalculate #/mL in stock, was probably done using Au concentration instead of AuCl concentration
SiO2	500	Bangs Labs	100000	2022-11-18	?	Used "old" suspension with varied #/mL made in 2022, did not record specific dates when suspensions were made
SiO2	690	Bangs Labs	50000	2022-11-18	?
SiO2	895	Bangs Labs	50000	2022-11-18	?
SiO2	1050	Bangs Labs	250000	2022-11-18	?
SiO2	2060	Bangs Labs	250000	2022-11-18	?
SiO2	3170	Bangs Labs	250000	2022-11-18	?
SiO2	480	ThermoFisher	100000	2023-12-19	2023-09-29
SiO2	690	Bangs Labs	100000	2023-12-19	2023-09-29
SiO2	730	ThermoFisher	100000	2023-12-19	2023-09-29
SiO2	895	Bangs Labs	100000	2023-12-19	2023-09-29
SiO2	990	ThermoFisher	100000	2023-12-19	2023-09-29
SiO2	1050	Bangs Labs	100000	2023-12-19	2023-09-29
SiO2	1570	ThermoFisher	100000	2023-12-19	2023-09-29
SiO2	2060	Bangs Labs	100000	2023-12-19	2023-09-29
SiO2	3170	Bangs Labs	100000	2023-12-19	2023-09-29
Au	60	Nanocomposix	100000	2023-12-19	2023-09-29
Au	80	Nanocomposix	100000	2023-12-19	2023-09-29
Au	150	Nanopartz	100000	2023-12-19	2023-09-29
Au	200	Nanopartz	100000	2023-12-19	2023-09-29
Au	500	Nanopartz	100000	2023-12-19	2023-09-29	Data from standard is unreliable, standard does not seem to have 500 nm Au particles
Au	1000	Nanopartz	100000	2023-12-19	2023-09-29
Au	1500	Nanopartz	100000	2023-12-19	2023-09-29
Raw data locations	Particles measured	Path
2022-11-18	SiO2	C:\The Ohio State University\Nanoparticles NSF - General\Engineered NP measurements\Engineered SiO2 NPs\2022 11 18 SiO2 resolution experiment
2023-12-19	SiO2	C:\The Ohio State University\Nanoparticles NSF - General\Engineered NP measurements\Engineered SiO2 NPs\2023 12 19 SiO2 normal and reduced sensitivity
2023-12-19	Au	C:\The Ohio State University\Nanoparticles NSF - General\Engineered NP measurements\Engineered Au NPs\2023 12 19 Au NPs reduced normal pulse analog

## Sheet: _xltb_storage_
XL Toolbox Settings
	export_preset	<?xml version="1.0" encoding="utf-16"?>_x000D_ <Preset xmlns:xsd="http://www.w3.org/2001/XMLSchema" xmlns:xsi="http://www.w3.org/2001/XMLSchema-instance">_x000D_ <Name>Tiff, 600 dpi, RGB, White canvas</Name>_x000D_ <Dpi>600</Dpi>_x000D_ <FileType>Tiff</FileType>_x000D_ <ColorSpace>Rgb</ColorSpace>_x000D_ <Transparency>TransparentCanvas</Transparency>_x000D_ <UseColorProfile>false</UseColorProfile…
	export_path	D:\MyFilesCF\Papers\2024 JAAS Linearity and Transport Eff\Figures for paper\Hi Res Figures\Fig 4.tif

## Sheet: SiO2 summary
Sensitivity	Slope	Sens. reduction factor (Optimized slope/slope)												Figures for JAAS paper
Optimized	2.90728	1
Somewhat	0.218125	13.3285
Highly	0.0108052	269.062
z-score for 90% CI	1.64485
Optimized (1x) sensitivity (measured 11/08/2022)					Bold Si masses, Si+ intensities are used to calculate slope
Particle manufacturer	Size (nm)	Density (g/cm3)	Size (nm) Si in SiO2	Mass (fg) SiO2 particle	Mass (fg) Si	Normal int (counts)	Normal int (c/s)	Int. RSD	RSD 90% CI	Mass Si in particle/Mass Si in 3170 nm particle	Si int of particle/Si int of 3170 nm particle	Particle c/fg Si
Bangs Labs	500	2	387.89	130.896	61.0847	224.075	746917	2.11152	3.47315	2.62807	99.1141	3.66827
Bangs Labs	690	2	535.288	322	160.535	501.43	1.67143e+06	6.29659	10.357	5.73534	44.2913	3.12349
Bangs Labs	895	2	694.322	750.732	350.342	1062.81	3.54268e+06	15.0605	24.7723	2.18234	20.8966	3.03363
Bangs Labs	1050	2	814.568	1212.23	565.706	1435.7	4.78566e+06	8.60538	14.1546	3.52388	15.4691	2.53789
Bangs Labs	2060	2	1598.1	9154.14	4271.93	8081.03	2.69368e+07	115.851	190.558	12.1936	2.74829	1.89166
Bangs Labs	3170	2	2459.22	33357.5	15566.8	22209	7.403e+07	228.944	376.58	27.5176	1	1.42669
Somewhat (13x) reduced sensitivity (measured 12/19/2023)					Bold Si masses, Si+ intensities are used to calculate slope
Particle manufacturer	Size (nm)	Density (g/cm3)	Size (nm) Si in SiO2	Mass (fg) SiO2 particle	Mass (fg) Si	Avg. int. (counts)	Avg int (cps)	Int. RSD	RSD 90% CI	Mass Si in particle/Mass Si in 3170 nm particle	Si int of particle/Si int of 3170 nm particle	Particle c/fg Si
ThermoFisher	480	2.2	372.374	127.389	59.4482	22.6404	75468.1	0.421595	0.693463	78.9916	261.855	0.380843
Bangs Labs	690	2	535.288	344.004	160.535	35.9709	119903	0.394171	0.648355	49.718	96.9685	0.224069
ThermoFisher	730	2.2	566.319	448.102	209.114	47.8848	159616	0.824344	1.35593	37.348	74.4417	0.228989
Bangs Labs	895	2	694.322	750.732	350.342	74.4391	248130	0.960378	1.57968	24.0251	44.4333	0.212476
ThermoFisher	990	2.2	768.021	1117.67	521.58	115.911	386369	0.217233	0.357317	15.4292	29.8455	0.22223
ThermoFisher	1570	2.2	1217.97	4457.67	2080.24	370.195	1.23398e+06	1.95048	3.20825	4.83098	7.48318	0.177957
Bangs Labs	2060	2	1598.1	9154.14	4271.93	673.301	2.24434e+06	4.88058	8.02784	2.65617	3.64398	0.15761
Bangs Labs	3170	2	2459.22	33357.5	15566.8	1788.4	5.96134e+06	16.9787	27.9275	1	1	0.114885
Highly (269x) reduced sensitivity (measured 11/08/2022)					Bold Si masses, Si+ intensities are used to calculate slope
Particle manufacturer	Size (nm)	Density (g/cm3)	Size (nm) Si in SiO2	Mass (fg) SiO2 particle	Mass (fg) Si	Reduced int (counts)	Reduced int (c/s)	Int. RSD	RSD 90% CI	Mass Si in particle/Mass Si in 3170 nm particle	Si int of particle/Si int of 3170 nm particle	Particle c/fg Si
Bangs Labs	500	2	387.89	130.896	61.0847		0
Bangs Labs	690	2	535.288	322	160.535		0
Bangs Labs	895	2	694.322	750.732	350.342	18.6507	62169.1	1.10958	1.8251	44.4333	9.03686	0.0532359
Bangs Labs	1050	2	814.568	1212.23	565.706	19.4223	64740.9	0.239422	0.393813	27.5176	8.67789	0.0343328
Bangs Labs	2060	2	1598.1	9154.14	4271.93	46.5	155000	0.941388	1.54845	3.64398	3.62461	0.010885
Bangs Labs	3170	2	2459.22	33357.5	15566.8	168.544	561814	1.70489	2.80429	1	1	0.0108271		Measured for 3 minutes instead of 1.7 minutes. V
Scaling plot y-axes (counts to c/s)	Primary y-axis maximum (enter value)	Multiply by	Secondary y-axis maximum
	2500	3333.33	8.33333e+06
	counts		counts/s
Combined plot data	Si mass (fg)	Optimized sens (multiply by 1)	13x reduced (multiply by 13)	269x reduced (multiply by 269)
500	61.0847	224.075
690	160.535	501.43	467.622														Figures for JAAS paper
730	209.114		622.502														Multiply signal by recduction for to put on same scale.
895	350.342	1062.81	967.708
990	521.58		1506.84
2060	4271.93			12508.5
3170	15566.8			45338.4
Mass (fg) Si	Intensity used to calculate slope on plot
61.0847	224.075
160.535	501.43
160.535	467.622
209.114	622.502
350.342	1062.81
350.342	967.708
521.58	1506.84
4271.93	12508.5
15566.8	45338.4

## Sheet: 269x red SiO2 hist
895 nm SiO2 int (counts)	Size (nm) edge	Size (nm) center	# particles	#/mL		1050 nm SiO2 int (counts)	Size (nm) edge	Size (nm) center	# particles	#/mL		2060 nm SiO2 int (counts)	Size (nm) edge	Size (nm) center	# particles	#/mL		3170 nm SiO2 int (counts)	Size (nm) edge	Size (nm) center	# particles	#/mL
15.9753	0	0		0		24.9834				0		34.9874	0	0		0		149.954	0	0		0
16.9877	2	1	0	0		14.9834	1	0.5	0	0		41.9874	4	2	0	0		100.97	10	5	0	0
14.9877	4	3	0	0		18.9667	2	1.5	0	0		20.9873	8	6	12	704.06		131.954	20	15	5	166.236
19.9877	6	5	0	0		15.9834	3	2.5	0	0		56.962	12	10	15	880.075		106.954	30	25	7	232.731
28.9754	8	7	0	0		17.9667	4	3.5	0	0		19.9873	16	14	23	1349.45		99.9696	40	35	15	498.709
17.9877	10	9	0	0		14.9834	5	4.5	0	0		78.9875	20	18	34	1994.84		155.955	50	45	7	232.731
15.9753	12	11	0	0		17.9834	6	5.5	0	0		31.9874	24	22	33	1936.17		195.955	60	55	31	1030.67
18.9753	14	13	1	58.6717		18.9667	7	6.5	0	0		30.9874	28	26	41	2405.54		90.9695	70	65	25	831.182
14.9891	16	15	6	352.03		19.9667	8	7.5	0	0		52.9747	32	30	47	2757.57		133.954	80	75	33	1097.16
13.9891	18	17	2	117.343		15.9667	9	8.5	0	0		111.975	36	34	49	2874.91		189.939	90	85	45	1496.13
26.9782	20	19	3	176.015		18.9834	10	9.5	1	58.6717		15.9746	40	38	53	3109.6		156.954	100	95	53	1762.11
15.9891	22	21	0	0		14.9834	11	10.5	2	117.343		43.962	44	42	62	3637.64		158.954	110	105	51	1695.61
15.9879	24	23	1	58.6717		15.9834	12	11.5	3	176.015		32.9747	48	46	68	3989.67		94.9542	120	115	77	2560.04
18.9879	26	25	0	0		14.9834	13	12.5	4	234.687		24.9747	52	50	53	3109.6		68.9694	130	125	109	3623.95
22.9879	28	27	1	58.6717		25.9834	14	13.5	8	469.373		34.9747	56	54	45	2640.23		130.97	140	135	107	3557.46
	30	29	1	58.6717		16.9834	15	14.5	26	1525.46		127.962	60	58	42	2464.21		182.954	150	145	109	3623.95
	32	31	0	0		18.9667	16	15.5	33	1936.17		70.962	64	62	42	2464.21		92.985	160	155	121	4022.92
	34	33	0	0		14.9667	17	16.5	48	2816.24		52.9874	68	66	41	2405.54		63.9694	170	165	101	3357.98
	36	35	0	0		14.9667	18	17.5	37	2170.85		52.9747	72	70	31	1818.82		216.955	180	175	103	3424.47
	38	37	0	0		27.9667	19	18.5	37	2170.85		83.9876	76	74	22	1290.78		104.954	190	185	98	3258.23
	40	39	0	0		14.9834	20	19.5	24	1408.12		47.9874	80	78	25	1466.79		74.9387	200	195	86	2859.27
	42	41	0	0		16.9834	21	20.5	16	938.747		55.9747	84	82	24	1408.12		182.954	210	205	81	2693.03
	44	43	0	0		20.9834	22	21.5	15	880.075		94.9749	88	86	22	1290.78		202.939	220	215	71	2360.56
	46	45	0	0		22.9834	23	22.5	16	938.747		75.962	92	90	19	1114.76		196.97	230	225	52	1728.86
	48	47	0	0		17.9834	24	23.5	10	586.717		44.9747	96	94	17	997.418		158.939	240	235	46	1529.37
	50	49	0	0		18.9834	25	24.5	12	704.06		76.9875	100	98	19	1114.76		159.954	250	245	38	1263.4
	52	51	0	0		29.9834	26	25.5	6	352.03		85.9748	104	102	10	586.717	66	136.954	260	255	22	731.44
	54	53	0	0		13.9667	27	26.5	9	528.045		20.9746	108	106	8	469.373	0.0729282	122.97	270	265	24	797.935
	56	55	0	0		18.9667	28	27.5	2	117.343		115.975	112	110	10	586.717		182.955	280	275	18	598.451
	58	57	0	0		21.9667	29	28.5	4	234.687		60.9747	116	114	6	352.03		127.97	290	285	11	365.72
	60	59	0	0		20.9667	30	29.5	3	176.015		43.9747	120	118	7	410.702		242.939	300	295	4	132.989
	62	61	0	0		16.9667	31	30.5	5	293.358		55.9747	124	122	4	234.687		197.971	310	305	19	631.698
	64	63	0	0		15.9667	32	31.5	0	0		67.9747	128	126	4	234.687		127.954	320	315	6	199.484
	66	65	0	0		17.9834	33	32.5	0	0		47.9874	132	130	0	0		188.954	330	325	4	132.989
	68	67	0	0		15.9834	34	33.5	0	0		58.9747	136	134	5	293.358		248.955	340	335	8	265.978
	70	69	0	0		20.9834	35	34.5	0	0		14.9746	140	138	2	117.343		119.97	350	345	5	166.236
	72	71	0	0		17.9667	36	35.5	1	58.6717		64.9748	144	142	4	234.687		57.9694	360	355	4	132.989
	74	73	0	0		14.9834	37	36.5	0	0		71.9621	148	146	3	176.015		155.954	370	365	2	66.4946				Average intensity
	76	75	0	0		20.9667	38	37.5	0	0		108.975	152	150	3	176.015		172.97	380	375	2	66.4946				Expected average intensity = (I3170 mm)(d/3170)3
	78	77	0	0		16.9667	39	38.5	0	0		21.9873	156	154	0	0		188.939	390	385	2	66.4946				Particle event threshold intensity (move red lines to correct threshold value for 2060 and 3170 nm)
	80	79	0	0		39.9667	40	39.5	1	58.6717		81.9748	160	158	0	0		44.9694	400	395	3	99.7418
	82	81	0	0		17.95	41	40.5	0	0		92.9621	164	162	0	0		87.9695	410	405	1	33.2473			d	Ave Int	Expected Int		Nopt	Nred	Nred/Nopt
	84	83	0	0		22.9834	42	41.5	0	0		36.9874	168	166	0	0		133.985	420	415	0	0			3170	168.544	168.544		1463	1613	1.10253
	86	85	0	0		16.9834	43	42.5	0	0		19.9873	172	170	0	0		151.97	430	425	5	166.236			2060	46.5962	46.2528		1125	905	0.804444
	88	87	0	0		28.9834	44	43.5	0	0		22.9873	176	174	0	0		185.955	440	435	1	33.2473			1050	19.4223	6.12497		2194	313	0.142662
	90	89	0	0		20.9667	45	44.5	0	0		29.9747	180	178	0	0		52.9694	450	445	1	33.2473			890	18.6507	3.72998		1462	15	0.0102599
		>90	0			22.9834		>45	0			71.9747		>180	0			58.9694		>450	7
	# particles		15			16.9834	# particles		323			89.9749	# particles		905			103.985	# particles		1613
	# particles/mL		6e-05			17.9834	# particles/mL		0.001292			90.9622	# particles/mL		0.00362			173.954	# particles/mL		0.006452
	Average int. (counts)		18.6507			26.9667	Average int. (counts)	19.4223	19.4223			59.962	Average int. (counts)		46.5962			189.986	Average int. (counts)		168.544
						28.9667						139.975						85.9695
	Vol. (mL) to ICP					28.9667	Vol. (mL) to ICP					89.9748	Vol. (mL) to ICP					117.97	Vol. (mL) to ICP
	0.017044					22.9834	0.017044					55.9747	0.017044					110.97	0.0300776
						16.9834						38.9747						170.955
						13.9833						36.9874						152.985
						14.9834						71.9621						92.9387
						19.9834						47.962						134.939
						17.9834						68.962						274.955
						24.9667						25.9746						225.924
						15.9834						109.962						215.94
						20.9834						37.9747						144.954
						21.9667						77.9621						189.955
						21.9667						71.9747						188.955
						17.9667						80.9621						192.939
						13.9833						109.962						137.985
						16.9667						50.962						153.954
						21.9667						92.9876						94.9695
						10.9833						44.9747						121.954
						18.9667						72.9621						172.97
						26.9667						43.9747						146.97
						25.9834						68.9875						214.955
						16.9667						23.9746						131.97
						17.9667						83.9621						132.97
						14.9834						85.9749						181.955
						22.9834						110.988						103.954
						15.9834						88.9622						157.939
						14.9667						96.9621						231.955
						18.9667						73.9621						182.955
						15.9667						48.9874						159.97
						17.9834						48.9747						143.955
						15.9667						75.9875						408.269
						22.9834						88.9748						119.954
						25.9834						136.975						188.939
						23.9834						35.9493						169.955
						19.9834						74.9748						137.97
						14.9834						63.962						172.924
						24.9834						62.962						174.955
						30.9667						100.975						114.985
						13.9833						36.9747						146.97
						18.9667						89.9621						164.97
						16.9667						61.9747						155.97
						16.9834						86.9749						187.955
						19.9834						53.9747						169.97
						15.9834						26.9747						232.955
						17.9834						28.9747						153.954
						18.9667						22.9873						142.954
						17.9834						78.9621						126.954
						18.9834						59.9747						96.9696
						15.9667						56.9747						158.97
						22.9667						81.9749						159.955
						24.9667						104.975						134.954
						19.95						74.9748						179.97
						35.9667						66.962						114.954
						19.9834						69.9747						262.94
						20.95						82.2321						201.955
						29.9834						38.962						195.955
						23.9834						89.9748						175.598
						19.9834						51.9747						113.954
						23.9834						74.9747						126.954
						16.9834						100.975						177.955
						20.9834						42.9747						117.97
						16.9667						31.9747						192.955
						20.9834						76.9748						112.939
						26.9667						45.9747						125.97
						30.9667						52.9747						127.97
						22.9667						18.9746						113.97
						17.9834						30.9747						130.954
						21.9834						57.9747						123.954
						17.9834						35.9874						485.527
						15.9834						43.9747						207.955
						16.984						26.9747						137.97
						15.984						48.9747						169.955
						24.952						42.962						186.955
						29.968						61.9875						133.954
						11.984						49.9747						154.954
						30.952						51.9747						142.97
						21.968						54.9747						84.9695
						19.984						49.9747						127.97
						17.984						27.9873						316.584
						24.984						107.975						165.954
						19.968						57.962						161.97
						17.984						19.9746						131.97
						19.968						27.9747						203.939
						24.968						85.9748						127.954
						16.984						52.962						168.97
						16.984						63.9747						206.924
						15.984						39.9747						171.97
						14.984						59.9747						199.971
						18.984						83.9621						75.9694
						25.984						108.975						134.954
						18.968						63.962						151.954
						16.968						53.962						130.97
						18.984						33.962						71.9694
						18.984						133.962						200.955
						16.984						55.962						132.954
						17.984						69.9748						115.954
						18.984						82.9621						167.954
						12.968						40.9874						210.939
						16.968						109.988						239.94
						14.968						99.9622						113.954
						19.984						82.9748						117.97
						19.984						53.9874						195.939
						17.984						28.9873						138.97
						17.984						38.9747						223.955
						18.984						14.9873						76.9541
						25.984						67.9621						121.954
						11.984						72.9747						193.939
						17.968						74.9875						155.939
						19.952						55.9874						76.9694
						14.968						64.962						191.955
						18.968						50.9747						181.954
						18.968						66.9875						173.954
						22.984						66.9747						109.97
						26.968						60.9493						224.939
						15.968						49.962						130.954
						18.968						85.9621						233.939
						18.968						121.975						172.955
						13.984						19.9746						397.878
						14.952						33.9747						130.939
						21.984						69.9747						159.954
						15.968						22.9873						157.954
						18.968						54.9747						108.97
						18.984						100.975						141.954
						23.952						44.9874						168.97
						16.984						57.9747						180.955
						14.968						144.988						151.939
						21.984						46.962						57.9848
						16.984						33.9874						47.9694
						24.984						89.9621						77.9387
						15.984						57.962						201.939
						14.968						98.9749						207.97
						18.952						43.9747						167.955
						19.968						34.9747						86.9541
						17.968						76.9748						281.924
						12.968						31.9747						144.954
						22.968						46.9747						146.613
						15.984						35.9747						202.939
						16.984						66.9747						135.954
						14.968						69.9875						103.954
						24.984						60.9874						132.97
						16.968						29.9747						97.9541
						18.968						67.9747						158.954
						15.984						68.9747						148.954
						23.968						90.9876						243.939
						21.984						38.9747						117.939
						16.984						34.9874						146.954
						19.984						62.962						145.954
						20.984						32.9747						94.9541
						16.968						36.9747						94.9541
						23.968						72.962						39.9694
						17.984						22.9746						227.955
						16.968						75.9748						131.954
						21.984						60.9747						150.97
						17.984						140.962						150.954
						17.984						91.9622						326.94
						27.984						49.9747						79.9541
						17.968						101.962						347.728
						14.968						18.9746						186.97
						16.968						61.9747						96.9696
						26.984						57.9747						122.97
						21.984						57.9747						172.955
						18.984						38.9874						50.9694
						19.984						108.962						177.955
						17.952						118.962						91.9695
						21.968						31.9747						133.97
						19.968						56.962						273.443
						18.984						112.975						194.955
						20.984						56.9747						348.67
						13.984						72.9747						218.939
						17.984						27.9873						109.954
						17.9844						99.9622						175.955
						13.9844						60.962						142.97
						19.9844						69.9748						169.954
						14.9688						34.9747						153.939
						20.9688						77.9748						137.97
						18.9844						25.9747						136.954
						18.9688						40.9747						166.955
						10.9844						66.962						159.97
						15.9844						35.9747						97.9542
						16.9688						47.962						334.94
						9.98439						44.9747						197.955
						16.9844						52.9747						194.97
						16.9688						50.9747						125.939
						21.9844						99.9748						146.97
						16.9844						73.9748						154.97
						18.9844						65.9621						135.954
						19.9844						68.9748						58.9694
						17.9844						52.9747						81.9694
						11.9688						98.9749						221.939
						26.9688						48.9747						156.954
						22.9844						60.9747						192.939
						16.9844						18.9746						171.97
						18.9844						78.9875						156.939
						17.9844						76.9748						156.954
						17.9688						49.9747						189.955
						24.9688						52.9747						84.9541
						15.9844						21.9746						98.9543
						15.9844						83.9749						131.97
						16.9844						75.9621						144.939
						22.9844						30.9747						306.94
						16.9844						15.9873						98.9696
						17.9688						92.9749						80.9695
						12.9688						108.962						89.9541
						24.9688						125.975						189.955
						16.9688						27.9747						178.97
						23.9688						49.9747						21.9847
						26.9688						73.9747						101.97
						15.9844						88.9876						139.954
						23.9844						72.9621						113.954
						16.9688						43.9874						187.955
						16.9688						16.9873						171.954
						28.9844						110.949						175.955
						12.9844						62.9875						104.954
						17.9844						65.9747						204.955
						19.9688						50.9874						191.939
						13.9688						50.9747						149.97
						16.9688						39.9747						299.94
						20.9844						43.9874						218.939
						15.9844						62.962						132.97
						21.9844						76.9875						161.954
						18.9844						87.9749						248.924
						15.9844						84.9748						169.954
						15.9844						119.949						150.954
						19.9844						77.9748						251.955
						16.9844						88.9748						221.939
						26.9688						31.962						169.939
						16.9844						58.962						136.954
						16.9688						84.9621						111.954
						23.9688						27.9873						364.894
						26.9844						48.9747						133.954
						17.9688						15.9873						219.955
						24.9844						51.9747						100.97
						19.9844						30.9747						214.939
						18.9844						68.9875						156.955
						15.9844						105.962						205.939
						14.9844						108.988						98.9696
						14.9844						45.9747						205.955
						18.9844						25.9746						84.9541
						22.9688						48.9874						110.954
						20.9844						97.9622						114.97
						14.9844						126.975						96.9695
						15.9688						43.9747						54.9694
						30.9844						101.962						277.94
						16.9688						33.9747						228.955
						16.9688						85.9876						184.955
						17.9688						100.962						107.97
						15.9844						45.9747						212.955
						14.9844						56.962						286.94
						21.9844						117.962						235.971
						20.9688						142.975						195.955
						16.9688						39.962						220.97
						19.9844						44.962						141.97
						19.9532						56.9747						110.954
						15.9688						63.962						160.955
						15.9844						74.9621						152.939
						16.9844						58.9874						189.939
						23.9688						17.9873						72.9695
						22.9688						54.9747						55.954
						17.9844						50.9747						159.924
						18.9688						134.976						189.939
						30.9688						88.9643						164.954
						15.9844						17.9761						236.955
						25.9844						43.9642						305.909
						22.9688						86.9642						198.955
						14.9844						43.9642						153.955
						22.9844						45.9761						201.939
						20.9844						36.9761						138.939
						16.9688						48.9642						74.9694
						18.9844						17.9881						98.9695
						15.9844						70.9643						204.939
						16.9688						45.9761						138.955
						16.9844						19.9881						138.954
						18.9688						15.9761						150.939
												42.9761						194.955
												72.9642						184.97
												28.9881						152.97
												41.9761						174.939
												71.9642						133.97
												71.9882						119.97
												91.9763						153.954
												58.9762						152.97
												41.9761						206.955
												74.9642						37.9693
												97.9764						121.97
												54.9762						148.97
												54.9882						232.924
												74.9642						145.939
												85.9763						80.9541
												37.9761						183.939
												24.9881						166.97
												43.9881						161.954
												52.9762						168.954
												79.9643						108.97
												67.9762						120.97
												19.9761						261.955
												30.9761						121.97
												40.9881						116.97
												31.9881						115.97
												65.9642						224.955
												33.9881						262.284
												30.9761						122.97
												67.9642						50.9694
												54.9761						61.9694
												72.9762						126.954
												56.9761						129.97
												31.9881						233.955
												46.9881						87.9541
												76.9763						111.954
												77.9643						195.955
												18.9881						143.939
												108.952						196.955
												24.9881						175.954
												46.9761						160.955
												36.9642						215.939
												17.9761						195.939
												87.9763						123.954
												62.9642						148.954
												54.9762						139.939
												84.9763						128.954
												70.9762						270.955
												57.9882						220.924
												94.9764						206.939
												50.9642						99.9542
												23.9881						180.955
												25.9881						115.954
												40.9761						218.939
												41.9761						106.97
												20.9761						140.954
												39.9761						157.97
												66.9882						70.9694
												52.9761						163.939
												30.9881						52.9694
												44.9881						118.97
												44.9761						143.955
												62.9762						208.939
												43.9881						173.954
												40.9761						107.954
												29.9761						262.94
												55.9762						192.97
												19.9761						67.9694
												93.9763						272.342
												92.9643						126.954
												93.9643						144.955
												67.9642						87.9695
												39.9761						145.954
												70.9762						201.971
												19.9761						178.955
												117.976						230.955
												108.964						185.939
												55.9882						185.97
												67.9762						279.385
												45.9762						266.94
												81.9763						193.955
												45.9642						113.97
												30.9761						123.985
												31.9761						164.97
												77.9642						368.941
												25.9761						72.9541
												24.9761						113.97
												42.9761						188.924
												80.9642						261.971
												30.9881						266.924
												69.9882						196.955
												55.9762						186.955
												42.9761						175.97
												46.9642						182.955
												50.9761						141.955
												25.9881						140.97
												42.9642						249.939
												31.9761						170.986
												34.9642						429.569
												43.9642						230.955
												36.9761						174.955
												79.9883						100.954
												45.9642						145.954
												76.9883						201.971
												104.964						131.939
												24.9761						156.97
												75.9762						125.954
												71.9643						202.955
												83.9763						49.9694
												49.9761						394.928
												59.9642						222.955
												26.9881						220.939
												84.9763						261.955
												38.9642						210.97
												51.9762						158.939
												19.9761						151.954
												47.9642						116.954
												55.9761						120.97
												45.9761						109.97
												73.9762						261.955
												80.9763						110.954
												53.9642						155.954
												21.9641						249.94
												83.9763						97.9696
												21.9761						104.97
												70.9642						172.954
												55.9642						126.939
												108.964						157.955
												27.9761						143.954
												30.9761						181.955
												47.9642						215.955
												59.9762						185.939
												56.9762						157.939
												20.9761						130.954
												45.9761						154.97
												27.9761						139.954
												43.9761						192.939
												96.9763						233.924
												77.9763						200.955
												69.9642						175.924
												42.9881						137.954
												50.9881						102.954
												52.9762						213.939
												22.9761						182.939
												88.9883						235.94
												107.964						240.955
												95.9523						101.969
												57.9762						78.9849
												48.9761						136.97
												41.9761						211.939
												119.964						58.9694
												42.9761						183.955
												35.9761						127.954
												74.9642						179.939
												40.9761						194.939
												80.9642						178.954
												46.9881						95.9541
												76.9763						143.97
												52.9881						303.471
												28.9761						87.9849
												51.9761						28.9693
												64.9762						135.97
												52.9881						222.955
												80.9643						125.954
												45.9881						38.9693
												85.9763						138.954
												145.989						189.955
												22.9761						225.955
												19.9881						122.923
												32.9761						175.939
												47.9762						100.97
												98.9643						175.97
												52.9762						148.954
												27.9761						135.97
												58.9642						128.954
												40.9761						210.939
												67.9642						238.94
												22.9761						242.924
												42.9881						73.9541
												30.9881						170.939
												23.9881						241.924
												73.9762						100.97
												78.9763						193.939
												74.9762						30.9693
												42.9881						242.955
												55.9762						155.939
												42.9881						226.939
												61.9762						164.955
												64.9762						143.97
												63.9642						178.97
												27.9881						149.954
												71.9762						137.955
												20.9881						52.9694
												19.9761						133.97
												100.964						121.954
												92.9643						12.9847
												70.9642						171.955
												57.9762						52.9694
												34.9881						128.97
												30.9761						77.9541
												40.9761						171.97
												63.9762						170.97
												43.9642						275.94
												26.9641						30.9693
												92.9763						162.939
												28.9761						243.955
												47.9761						300.924
												41.9761						171.97
												65.9762						236.97
												90.9644						214.939
												33.9881						158.955
												90.9764						185.924
												33.9881						156.955
												25.9761						388.039
												23.9761						186.954
												23.9761						229.955
												44.9761						107.954
												76.9642						168.97
												35.9761						189.97
												44.9881						162.97
												30.9881						132.954
												81.9763						59.9541
												46.9761						147.939
												58.9522						271.955
												37.9761						255.94
												15.9761						197.955
												68.9642						99.9695
												33.9761						185.97
												41.9761						66.954
												61.9762						213.939
												43.9761						201.969
												39.9881						110.968
												73.9762						145.968
												89.9523						36.9676
												18.9881						193.952
												122.989						82.9514
												86.9883						223.953
												28.9761						113.968
												28.9881						276.298
												50.9762						112.968
												81.9643						85.9677
												35.9642						210.936
												15.9881						205.936
												82.9762						88.9515
												51.9642						94.9514
												15.9761						102.968
												63.9762						168.935
												38.9642						159.952
												45.9761						216.952
												50.9642						224.952
												42.9761						147.952
												69.9642						132.952
												57.9762						266.936
												58.9762						249.919
												88.9643						232.936
												54.9761						132.952
												25.9761						126.968
												21.9761						144.952
												51.9762						195.952
												35.9761						116.968
												75.9762						230.968
												94.9884						184.952
												26.9761						129.968
												150.965						213.952
												213.977						156.968
												85.9762						355.41
												37.9761						66.9676
												55.9642						176.968
												87.9763						158.968
												81.9643						509.628
												123.965						114.968
												111.976						210.953
												73.9762						159.952
												35.9881						146.968
												37.9881						268.936
												39.9761						270.383
												49.9881						174.952
												81.9762						55.9676
												23.9761						93.9677
												34.9761						254.936
												68.9762						177.952
												67.9762						111.951
												47.9642						155.968
												48.9761						337.625
												40.9881						123.968
												198.965						213.936
												35.9761						112.951
												22.9761						213.936
												69.9642						143.968
												58.9522						190.968
												180.965						77.9677
												125.976						88.9677
												21.9881						133.952
												103.976						99.9515
												38.9761						187.935
												55.9882						263.936
												65.9882						195.936
												58.9642						142.919
												72.9762						147.968
												25.9761						301.936
												99.9763						57.9513
												27.9881						257.936
												73.9762						195.936
												86.9643						145.935
												35.9881						193.968
												47.9761						235.952
												41.9881						210.952
												55.9762						139.952
												68.9762						287.936
												35.9761						157.968
												18.9761						195.952
												37.9741						145.952
												33.9741						198.952
												43.9871						142.952
												67.9742						75.9677
												85.9614						207.936
												70.9872						184.968
												34.9741						187.952
												64.9742						270.953
												48.9871						186.935
												15.9871						196.952
												158.988						137.952
												32.9741						222.952
												99.9613						186.968
												108.974						184.935
												51.9742						302.555
												53.9742						260.936
												65.9612						63.9513
												45.9871						95.9677
												38.9741						121.968
												28.9741						132.952
												48.9742						117.984
												57.9742						66.9676
												67.9872						297.571
												14.9741						206.919
												47.9871						256.952
												81.9743						143.952
												64.9742						173.952
												54.9612						165.968
												44.9742						86.9514
												22.9741						133.952
												63.9742						252.936
												37.9612						64.9513
												59.9742						139.952
												41.9742						169.935
												40.9742						210.968
												59.9742						156.952
												57.9612						211.952
												189.962						232.936
												31.9612						129.968
												27.9741						213.936
												61.9612						246.952
												37.9741						151.935
												93.9743						323.937
												60.9612						301.936
												81.9743						122.952
												61.9742						106.968
												16.9741						85.9677
												35.9741						90.9677
												17.9871						180.952
												51.9742						229.953
												36.9741						103.968
												15.9871						190.952
												37.9741						136.952
												31.9871						154.952
												59.9742						199.936
												100.974						146.968
												98.9744						181.968
												83.9743						199.936
												112.962						88.9677
												48.9742						118.968
												27.9741						202.968
												58.9872						147.952
												75.9613						153.952
												77.9873						250.936
												73.9743						30.9675
												32.9871						160.952
												54.9612						118.952
												78.9743						145.968
												18.9741						222.919
												54.9872						123.968
												82.9613						163.952
												70.9742						178.952
												68.9613						184.936
												36.9741						142.952
												77.9613						167.952
												36.9741						229.936
												26.9612						140.968
												82.9613						348.753
												117.961						154.935
												37.9612						178.968
												65.9742						133.952
												115.974						89.984
												93.9614						180.952
												30.9741						387.668
												140.975						157.935
												86.9743						255.952
												52.9612						135.968
												55.9872						111.968
												21.9612						21.9675
												25.9741						254.952
												145.975						170.952
												24.9871						108.968
												49.9742						164.968
												48.9871						260.936
												57.9612						567.107
												24.9871						218.952
												55.9742						205.968
												24.9612						163.952
												49.9742						226.952
												97.9743						112.951
												93.9614						132.952
												83.9613						84.9677
												52.9612						134.952
												92.9613						166.952
												90.9743						168.903
												75.9742						89.9514
												43.9871						281.92
												35.9741						129.952
												46.9742						127.935
												60.9612						257.936
												32.9612						126.952
												22.9871						127.952
												83.9743						172.952
												150.962						114.952
												58.9872						203.919
												81.9613						246.936
												70.9872						26.9675
												38.9741						120.952
												52.9612						106.952
												76.9743						161.968
												79.9743						164.952
												78.9743						242.919
												28.9741						171.935
												104.948						134.968
												142.974						128.984
												26.9741						240.953
												102.961						35.9676
												14.9871						174.952
												37.9741						161.936
												44.9871						129.952
												57.9742						128.935
												37.9741						346.41
												81.9743						145.952
												85.9743						170.952
												46.9742						123.968
												73.9613						111.968
												44.9742						231.952
												67.9613						153.968
												29.9741						14.9838
												80.9743						235.936
												38.9741						125.968
												44.9742						205.936
												164.988						35.9675
												37.9871						303.936
												49.9742						172.968
												39.9741						147.968
												22.9741						120.952
												65.9742						209.953
												52.9872						269.34
												29.9871						214.952
												68.9743						20.9675
												59.9742						215.952
												37.9742						143.968
												98.9743						156.968
												133.975						70.9676
												45.9742						126.952
												67.9613						140.952
												43.9612						248.936
												93.9613						199.936
												57.9742						156.952
												35.9612						148.952
												72.9743						209.919
												69.9742						241.952
												71.9742						179.936
												100.974						120.951
												63.9742						181.952
												24.9741						119.952
												58.9742						102.935
												34.9741						188.952
												77.9743						171.952
												85.9614						141.935
												64.9872						101.968
												77.9742						157.952
												103.987						106.952
												18.9871						234.936
												80.9742						58.9513
												36.9741						160.952
												75.9613						162.952
												80.9873						166.935
												90.9743						130.968
												63.9612						217.952
												38.9741						167.952
												58.9742						155.968
												26.9741						67.9676
												34.9741						85.9677
												88.9743						93.9677
												68.9743						141.952
												43.9742						242.952
												28.9871						144.968
												28.9871						78.9677
												43.9742						112.935
												63.9872						218.952
												61.9742						196.936
												65.9483						137.952
												87.9613						162.968
												120.961						179.952
												68.9742						111.968
												41.9871						224.952
												99.9743						179.969
												57.9742						213.952
												62.9742						168.952
												72.9742						124.952
												60.9872						200.935
												57.9742						152.968
												56.9742						277.936
												42.9871						141.935
												51.9612						134.952
												36.9871						129.952
												29.9871						140.968
												30.9871						205.953
												69.9613						164.968
												77.9743						262.936
												80.9743						161.935
												95.9744						126.968
												60.9742						424.097
												72.9743						271.324
												90.9613						250.936
												84.9742						102.968
												18.9741						229.952
												45.9742						158.952
												77.9613						215.92
												48.9742						203.952
												45.9742						63.9676
												16.9741						134.968
												89.9743						258.952
												54.9742						35.9838
												56.9612						99.9677
												74.9743						218.952
												46.9871						200.952
												65.9872						203.952
												52.9612						233.952
												89.9613						182.952
												116.988						318.367
												93.9743						108.968
												73.9613						51.9676
												38.9742						265.953
												82.9743						15.9838
												15.9871						302.92
												22.9871						217.936
												48.9742						296.469
												41.9741						122.951
												32.9741						125.968
												62.9742						19.9675
												110.962						162.952
												85.9743						196.952
												58.9742						68.9676
												62.9742						154.952
												81.9873						197.936
												99.9614						207.952
												33.9741						56.9676
												51.9742						441.411
												106.974						255.936
												83.9743						171.952
												82.9483						154.952
												48.9612						175.952
												26.9741						149.952
												29.9741						118.968
												55.9742						89.9677
												72.9742						210.952
												19.9871						140.968
												74.9743						172.952
												56.9742						169.935
												60.9742						122.968
												67.9612						92.9515
												82.9742						192.952
												48.9742						176.935
												53.9742						120.919
												80.9613						169.952
												56.9872						221.936
												65.9742						200.952
												62.9742						193.936
												31.9741						123.968
												67.9612						183.952
												32.9741						205.936
												71.9613						236.919
												56.9742						223.952
												71.9743						233.969
												63.9612						90.9677
												167.962						223.936
												47.9742						243.936
												52.9742						237.952
												108.948						243.953
												112.961						155.935
												91.9743						177.952
												36.9741						323.453
												18.9741						172.952
												149.962						161.952
												68.9743						88.9677
												40.9741						128.952
												69.9613						110.968
												99.9613						160.968
												37.9741						161.935
												56.9742						89.9677
												99.9744						196.952
												16.9741						465.368
												83.9743						141.968
												95.9614						123.968
												54.9742						103.968
												65.9742						142.968
												39.9741						92.9841
												82.9743						157.952
												30.9612						230.936
												70.9742						49.9676
												20.9871						116.968
												90.9744						137.968
												105.987						45.9676
												100.974						177.952
												22.9871						107.984
												49.9742						208.952
												34.9871						236.04
												70.9743						156.654
												22.9741						114.968
												33.9741						156.935
												19.9871						182.936
												38.9741						170.935
												92.9744						172.935
												110.961						184.935
												56.9742						104.951
												38.9741						216.936
												41.9742						190.935
												92.9744						119.952
												31.9741						129.968
												43.9742						112.968
												71.9742						139.952
												52.9742						167.936
												79.9613						157.952
												49.9612						112.968
												17.9612						75.9676
												46.9742						143.935
												115.948						181.968
												73.9613						146.952
												89.9614						125.952
												54.9612						159.952
												89.9613						129.968
												24.9871						129.952
												15.9741						53.9676
												70.9743						187.968
												108.975						179.952
												69.9742						166.935
												103.948						161.968
												133.975						214.952
												40.9742						179.952
												78.9743						304.953
												40.9871						197.952
												54.9483						214.952
												56.9742						94.9515
												15.9871						159.952
												108.948						114.968
												134.962						86.9677
												34.9871						202.968
												72.9743						212.952
												43.9742						169.935
												14.9871						225.952
												78.9873						121.952
												60.9612						259.919
												68.9742						243.952
												34.9871						82.9677
												67.9613						291.936
												16.9741						242.92
												33.9741						138.952
												37.9742						423.156
												15.9741						336.598
												48.9742						179.969
												75.9742						144.952
												42.9742						428.054
												70.9612						125.968
												44.9742						258.952
												9						331.92
												10						149.968
												11						169.968
												12						305.937
												13						117.968
												9						119.984
												10						97.9677
												11						283.936
												12						157.968
												13						118.935
												9						321.281
												10						167.952
												11						113.951
												12						222.969
												13						262.953
												9						223.953
												10						246.952
												11						189.919
												12						141.952
												13						222.969
												9						192.952
												10						192.952
												11						169.952
												12						333.937
												13						243.936
												6						192.919
												7						199.952
												8						212.952
												6						175.952
												7						213.936
												8						72.9839
												6						234.936
												7						263.936
												8						126.968
												6						234.936
												7						205.936
												8						396.968
												6						89.984
												7						166.952
												8						80.9677
												6						188.968
												7						160.952
												8						151.952
																		224.952
																		288.92
																		34.9838
																		144.935
																		203.952
																		59.9676
																		168.935
																		104.968
																		179.936
																		56.9839
																		268.34
																		197.952
																		146.968
																		132.968
																		158.968
																		211.968
																		120.952
																		145.952
																		33.9676
																		159.935
																		145.919
																		89.9514
																		166.952
																		112.968
																		184.952
																		204.936
																		154.919
																		165.952
																		123.968
																		133.935
																		200.935
																		177.952
																		128.952
																		330.582
																		151.935
																		140.952
																		196.936
																		310.513
																		198.937
																		94.9682
																		57.9681
																		119.968
																		94.9682
																		212.953
																		144.985
																		120.968
																		119.968
																		168.985
																		118.968
																		173.826
																		140.952
																		82.9682
																		124.936
																		126.936
																		132.952
																		124.952
																		154.92
																		66.9681
																		318.54
																		191.953
																		102.968
																		143.952
																		144.969
																		60.9521
																		174.953
																		345.352
																		78.9521
																		217.953
																		183.985
																		229.953
																		224.921
																		173.953
																		173.969
																		121.968
																		146.952
																		300.937
																		175.953
																		183.953
																		93.9683
																		181.953
																		105.952
																		239.169
																		249.937
																		242.025
																		168.953
																		205.953
																		232.969
																		202.953
																		192.936
																		128.952
																		211.921
																		124.936
																		106.952
																		175.953
																		246.937
																		266.937
																		202.953
																		156.936
																		111.968
																		308.54
																		125.952
																		130.968
																		121.952
																		126.952
																		68.9681
																		159.936
																		227.953
																		211.937
																		229.937
																		166.953
																		160.969
																		115.952
																		179.969
																		135.952
																		124.936
																		52.9681
																		141.968
																		143.968
																		173.969
																		274.953
																		60.9521
																		144.952
																		95.9682
																		124.952
																		147.952
																		206.921
																		218.953
																		201.937
																		163.969
																		166.969
																		181.952
																		233.953
																		133.936
																		30.968
																		179.969
																		157.969
																		189.969
																		170.92
																		173.953
																		134.952
																		198.953
																		242.969
																		169.936
																		163.952
																		112.952
																		169.953
																		162.953
																		206.969
																		306.282
																		113.984
																		142.985
																		51.9681
																		241.937
																		82.9522
																		337.684
																		131.952
																		139.953
																		219.969
																		198.998
																		126.952
																		195.953
																		168.952
																		150.969
																		181.969
																		270.937
																		157.936
																		131.952
																		146.952
																		159.92
																		161.952
																		183.937
																		243.953
																		138.968
																		68.9521
																		228.953
																		130.952
																		63.9681
																		179.969
																		200.937
																		207.921
																		180.936
																		142.952
																		217.953
																		277.937
																		200.953
																		190.953
																		162.969
																		199.937
																		156.953
																		138.969
																		88.9843
																		67.9681
																		125.952
																		193.953
																		114.952
																		181.953
																		227.953
																		139.936
																		161.937
																		232.953
																		139.968
																		134.952
																		36.9841
																		128.936
																		180.937
																		159.953
																		154.953
																		212.953
																		202.953
																		169.952
																		145.952
																		147.936
																		121.952
																		216.953
																		157.952
																		163.936
																		164.952
																		179.952
																		92.9682
																		80.9682
																		230.953
																		189.953
																		319.54
																		179.953
																		202.937
																		132.936
																		123.952
																		158.952
																		265.937
																		184.953
																		206.969
																		274.239
																		233.921
																		176.937
																		160.953
																		198.937
																		163.936
																		75.9681
																		195.936
																		181.969
																		139.953
																		123.968
																		178.953
																		250.921
																		161.968
																		209.953
																		201.953
																		208.953
																		153.953
																		193.953
																		283.384
																		233.953
																		149.953
																		93.9683
																		139.953
																		209.969
																		229.937
																		208.953
																		196.953
																		147.952
																		138.968
																		128.952
																		188.937
																		134.952
																		105.952
																		147.952
																		128.968
																		239.921
																		203.921
																		178.937
																		100.952
																		167.953
																		229.937
																		177.952
																		128.969
																		22.984
																		150.952
																		159.952
																		166.952
																		143.952
																		168.953
																		289.282
																		204.953
																		124.952
																		354.813
																		264.937
																		111.968
																		148.985
																		174.969
																		210.953
																		159.985
																		111.952
																		136.952
																		77.9682
																		181.937
																		174.953
																		107.968
																		194.953
																		74.9681
																		241.937
																		157.936
																		202.953
																		131.952
																		124.952
																		90.9522
																		192.92
																		145.936
																		303.921
																		351.905
																		145.952
																		216.953
																		182.953
																		176.969
																		191.937
																		422.867
																		79.9682
																		51.9681
																		147.968
																		57.9841
																		151.969
																		194.969
																		167.953
																		203.953
																		370.797
																		181.92
																		204.953
																		73.9681
																		151.936
																		143.969
																		213.937
																		77.9521
																		112.952
																		210.969
																		48.9681
																		141.969
																		74.9522
																		147.969
																		89.9843
																		302.921
																		302.938
																		151.969
																		174.92
																		171.969
																		93.9523
																		157.936
																		247.953
																		98.9362
																		258.921
																		40.9681
																		54.9681
																		221.953
																		189.953
																		234.953
																		332.921
																		173.937
																		59.9681
																		164.937
																		84.9682
																		359.556
																		178.953
																		148.985
																		139.952
																		227.937
																		253.937
																		112.952
																		144.969
																		80.9522
																		148.968
																		208.953
																		202.921
																		181.953
																		206.969
																		225.953
																		155.952
																		160.953
																		129.968
																		202.969
																		150.936
																		100.968
																		157.969
																		138.968
																		120.952
																		157.952
																		109.952
																		184.953
																		189.953
																		609.57
																		97.9683
																		219.953
																		210.937
																		213.937
																		186.969
																		282.427
																		95.9683
																		128.952
																		150.969
																		193.953
																		227.937
																		230.969
																		116.968
																		154.953
																		187.969
																		214.953
																		455.14
																		165.936
																		67.9681
																		69.9842
																		213.953
																		89.9522
																		100.968
																		113.952
																		198.969
																		211.937
																		137.936
																		150.612
																		160.969
																		107.952
																		96.9522
																		280.937
																		166.969
																		124.952
																		129.952
																		206.937
																		174.952
																		188.969
																		139.952
																		82.9682
																		176.953
																		239.953
																		275.937
																		152.953
																		85.9682
																		168.936
																		184.953
																		235.953
																		159.969
																		111.968
																		185.969
																		132.968
																		221.937
																		212.969
																		192.953
																		70.9681
																		144.952
																		147.952
																		193.937
																		138.952
																		193.953
																		17.968
																		185.936
																		192.969
																		286.937
																		189.953
																		197.953
																		233.937
																		153.969
																		208.953
																		208.937
																		217.953
																		187.953
																		183.953
																		115.968
																		165.969
																		164.953
																		89.9683
																		210.969
																		192.953
																		125.952
																		131.952
																		121.968
																		121.936
																		96.9682
																		75.9522
																		254.937
																		173.952
																		100.968
																		119.952
																		225.937
																		123.936
																		129.968
																		151.969
																		96.9523
																		131.952
																		137.952
																		201.953
																		222.953
																		136.985
																		304.427
																		81.9843
																		257.937
																		198.953
																		245.953
																		113.968
																		95.9683
																		439.797
																		174.953
																		121.952
																		205.953
																		72.9682
																		137.953
																		165.969
																		139.952
																		247.953
																		82.9843
																		183.937
																		204.953
																		223.953
																		170.969
																		149.968
																		190.953
																		375.883
																		173.936
																		171.936
																		56.9681
																		222.937
																		151.952
																		102.968
																		68.9521
																		154.952
																		54.9681
																		177.969
																		197.937
																		163.953
																		206.937
																		192.953
																		129.968
																		63.9681
																		232.953
																		215.953
																		171.953
																		129.936
																		90.9683
																		206.937
																		102.968
																		154.953
																		194.953
																		98.9683
																		218.953
																		163.969
																		484.91
																		30.984
																		248.937
																		259.953
																		157.953
																		72.9682
																		181.937
																		146.952
																		246.921
																		234.937
																		204.969
																		251.937
																		183.953
																		227.953
																		263.937
																		302.953
																		232.937
																		98.9682
																		153.952
																		135.968
																		184.953
																		193.953
																		221.953
																		200.937
																		233.921
																		218.937
																		145.952
																		240.937
																		314.921
																		142.936
																		130.952
																		69.9682
																		67.9681
																		185.953
																		20.984
																		210.937
																		76.9842
																		98.9683

## Sheet: Opt SiO2 hist
500	Size (nm) edge	Size (nm) center			690	Size (nm) edge	Size (nm) center			895	Size (nm) edge	Size (nm) center			1050	Size (nm) edge	Size (nm) center				2060	Size (nm) edge	Size (nm) center				3170	Size (nm) edge	Size (nm) center
198.977	0	0			393.393	0	0			951.648	0	0			1831.88	0	0				322.607	0	0				16429.1	0	0
204.465	12	6	0		417.696	18	9	0		967.753	60	30	0		2829.18	60	30	1			754.305	600	300	13			15245.8	1000	500
295.953	24	18	0		773.649	36	27	0		1513.8	120	90	3		1273.91	120	90	8			8875.06	1200	900	5			26257.6	2000	1500	5
201.465	36	30	0		416.736	54	45	0		1409.79	180	150	3		1043.06	180	150	7			11051.8	1800	1500	14			13624.7	3000	2500	3
159.465	48	42	0		602.834	72	63	1		1036.54	240	210	7		1196.89	240	210	9			8404.7	2400	2100	26			27707	4000	3500	2
300.708	60	54	2		607.591	90	81	0		955.292	300	270	9		1147.72	300	270	2			10259.9	3000	2700	37			28586.4	5000	4500	4
247.451	72	66	2		284.667	108	99	1		1069.24	360	330	4		1282.19	360	330	2			6243.05	3600	3300	42			23671.2	6000	5500	4
227.977	84	78	2		386.736	126	117	1		906.52	420	390	0		1123.59	420	390	3			5017.6	4200	3900	38			24242.7	7000	6500	5
216.977	96	90	6		495.234	144	135	2		1290.34	480	450	6		1213.53	480	450	4			6853	4800	4500	34			52.6376	8000	7500	8
214.977	108	102	5		728.478	162	153	2		899.12	540	510	2		1505.88	540	510	4			3461.75	5400	5100	32			8914.77	9000	8500	11
166.465	120	114	17		493.336	180	171	5		1543.76	600	570	8		1799.29	600	570	4			10994	6000	5700	41			16841.1	10000	9500	7
210.465	132	126	26		503.065	198	189	2		1294.43	660	630	4		1800.74	660	630	6			7617.79	6600	6300	58			24330.7	11000	10500	14
241.465	144	138	43		434.779	216	207	1		1028.59	720	690	6		1523.99	720	690	5			9442.45	7200	6900	74			30667.3	12000	11500	12
155.465	156	150	72		426.29	234	225	3		1266.79	780	750	9		1806.03	780	750	9			11625.5	7800	7500	87			25737.9	13000	12500	13
98.9763	168	162	88		491.079	252	243	2		1163.21	840	810	9		1424.45	840	810	11			10044.7	8400	8100	79			31140.1	14000	13500	23
241.465	180	174	92		437.876	270	261	4		993.459	900	870	19		1279.1	900	870	10			11970.9	9000	8700	107			1864.71	15000	14500	37
154.977	192	186	130		463.076	288	279	7		1098.27	960	930	42		1892.78	960	930	30			9431.25	9600	9300	97			21260.6	16000	15500	38
261.465	204	198	146		614.851	306	297	6		1321.79	1020	990	33		1445.42	1020	990	61			10121.9	10200	9900	84			28722.9	17000	16500	33
170.977	216	210	146		590.937	324	315	12		1078.94	1080	1050	53		990.774	1080	1050	81			9137.77	10800	10500	64			13282.1	18000	17500	54
276.751	228	222	135		550.491	342	333	14		780.495	1140	1110	40		1860.09	1140	1110	118			3988.34	11400	11100	42			23732.2	19000	18500	49
208.465	240	234	123		566.723	360	351	26		1076.12	1200	1170	41		1830.32	1200	1170	145			9441.2	12000	11700	47			17344.9	20000	19500	73
171.465	252	246	112		407.876	378	369	28		1170.57	1260	1230	41		1378.27	1260	1230	158			8726.24	12600	12300	31			26113.8	21000	20500	71
242.465	264	258	105		387.525	396	387	39		1384.97	1320	1290	38		1743.09	1320	1290	178			9644.61	13200	12900	25			19970	22000	21500	101
148.465	276	270	71		400.905	414	405	40		1265.55	1380	1350	32		1738.85	1380	1350	184			8705.25	13800	13500	13			22818.6	23000	22500	90
226.465	288	282	45		255.01	432	423	45		1090.99	1440	1410	13		2358.27	1440	1410	169			10414.7	14400	14100	13			20013.3	24000	23500	109
206.953	300	294	35		422.736	450	441	43		1193.45	1500	1470	7		1336.95	1500	1470	145			5567.87	15000	14700	8			16572.6	25000	24500	111
343.966	312	306	26		528.491	468	459	50		950.063	1560	1530	5		1175.85	1560	1530	170			9040.3	15600	15300	2			26106.1	26000	25500	102
274.953	324	318	14		463.993	486	477	36		1341.73	1620	1590	6		1100.42	1620	1590	136			11753.5	16200	15900	2			20502.6	27000	26500	84
171.977	336	330	5		461.59	504	495	57		1327.66	1680	1650	7		976.774	1680	1650	125			10464.5	16800	16500	0			22233.3	28000	27500	83
274.465	348	342	6		456.865	522	513	45		1326.98	1740	1710	1		1862.11	1740	1710	85			4044.73	17400	17100	0			26456	29000	28500	56
250.465	360	354	1		426.465	540	531	40		1302.14	1800	1770	0		1778.38	1800	1770	83			12331.6	18000	17700	0			20699.4	30000	29500	61
224.977	372	366	1		362.95	558	549	31		1236.13	1860	1830	1		1109.79	1860	1830	59			10754.1	18600	18300	0			22484.9	31000	30500	54
238.953	384	378	9		601.58	576	567	32		1254.22	1920	1890	0		1219.52	1920	1890	52			4473	19200	18900	1			25608.9	32000	31500	44
274.751	396	390	6		480.465	594	585	31		1226.79	1980	1950	0		1400.19	1980	1950	37			4184.51	19800	19500	0			18676.9	33000	32500	26
247.953	408	402	3		547.251	612	603	21		795.958	2040	2010	0		1630.58	2040	2010	23			8128.07	20400	20100	2			21063.7	34000	33500	18
274.465	420	414	6		822.036	630	621	22		965.33	2100	2070	0		1788.26	2100	2070	15			8525.59	21000	20700	2			23944.8	35000	34500	14
130.977	432	426	4		136.937	648	639	14		1141.75	2160	2130	0		1718.83	2160	2130	7			5998.7	21600	21300	1			30078.1	36000	35500	14
304.88	444	438	1		654.131	666	657	11		1091.24	2220	2190	1		1213.78	2220	2190	9			3175.09	22200	21900	0			21213.9	37000	36500	9
258.953	456	450	1		493.281	684	675	9		1344.13	2280	2250	0		1341.93	2280	2250	7			8994.26	22800	22500	1			21571	38000	37500	6
236.929	468	462	0		560.808	702	693	8		1331.47	2340	2310	0		1210.56	2340	2310	6			12201.2	23400	23100	1			20445.3	39000	38500	3
143.44	480	474	1		302.693	720	711	3		1358.04	2400	2370	0		1020.26	2400	2370	6			7009.91	24000	23700	1			49.6376	40000	39500	2
265.666	492	486	2		490.419	738	729	9		1097.87	2460	2430	0		1832.14	2460	2430	4			8652.51	24600	24300	1			16955.5	41000	40500	3
202.465	504	498	1		309.01	756	747	5		1154.98	2520	2490	0		1337.46	2520	2490	5			11280.8	25200	24900	0			31042.2	42000	41500	2
178.465	516	510	1		244.095	774	765	3		899.077	2580	2550	1		934.56	2580	2550	4			2433.36	25800	25500	0			29661.7	43000	42500	1
253.977	528	522	0		1134.28	792	783	2		1131.5	2640	2610	0		1262.98	2640	2610	1			11868.3	26400	26100	0			26240.3	44000	43500	3
237.465	540	534	3		458.162	810	801	2		1476.25	2700	2670	0		1325.48	2700	2670	6			3929.1	27000	26700	0			31516.3	45000	44500	1
195.465	Total		1494		422.29	Total		715		1156.19	Total		451		962.017	Total		2194			11796	Total		1125			24063.2	Total		1463
235.465			0.005976		404.033			0.00286		317.869			0.001804		2045.34						11481.8						9575.07
260.465	Average	224.075			501.64	Average	501.43			1336.39	Average	1062.81			971.689	Average	1435.7				7051.45	Average	8081.03				14562	Average	22209
251.978					410.905					1400.9					1338.25						7058.36						29348.9
262.465					365.308					910.477					1465.32						7401.48		8750				26485.7		24500
237.977					538.813					971.549					1335.12						7319.12						31427.5
209.977					507.508					1352.9					1179.85						3520.8						19336.9
603.67					633.752					1846.39					1055.56						10129.3						18912.4
290.953					404.161					1659.91					1665.01						9731.35						18741.4
293.978					455.99					1065.94					1632.39						4869.83						19539.8
255.465					721.564					1117.29					1486.26						9390.85						1341.55
265.465					521.502					1202.56					1678.92						4601.34						19054.2
388.009					422.907					706.447					1428.32						6949.57						22159.5
212.953					389.779					1181.53					1004.82						9332.51						25900.1
274.953					575.013					1016.26					1367.67						3059.28						14860.5
219.465					753.267					812.09					889.488						8303.18						13829.9
244.465					500.591					1260.48					1789.01						8394.06						18650.3
227.465					500.548					903.782					1652.28						8586.03						28298.6
268.465					628.974					1219.64					1254.15						10013.6						21306.8
310.709					296.407					722.219					1112.65						7130.8						28163.6
208.465					391.907					1023.76					1507.18						9515.13						31937.2
150.489					165.469					1078.21					1698.12						10096.8						22667.3
215.977					600.217					1369.52					1240.35						1938.78						22836.4
252.465					509.379					1101.97					1243.36						5526.3						14615.7
251.929					441.865					1293.17					1032.14						7633.16						18396.8
252.977					401.344					1078.04					1303.5						7671.58						18873.3
192.953					691.392					1247.56					3657.45						8357.36						25698.1
267.465					59.937					254.868					3657.45						7557.83						18400.1
328.966					473.344					1209.51					1114.58						6376.46						24319.6
284.708					587.551					223.868					1502.42						7366.97						23685.3
104.976					533.294					1066.8					1136.86						10713.2						11456.3
166.977					548.505					520.803					1185.27						9513.95						14578.4
224.977					470.813					1464.24					1125.87						6282.27						29240.3
266.417					608.92					1369.6					1069.47						6772.73						67.9564
284.953					470.416					889.787					1805.14						6180.78						17131.4
240.465					561.765					1107.19					1292.95						10799.7						20357.2
176.465					529.108					1566.1					1661.71						9110.09						28173.1
207.465					208.938					1096.63					1118.4						6091.35						14911.4
250.177					659.766					1129.46					1632.58						9220.35						31475
164.977					732.478					914.434					1110.38						14097.3						25599.2
120.976					667.237					1067.01					1400.16						9987.07						23437.1
216.953					463.551					1259.96					630.216						6394.55						19867.1
148.465					568.68					1287.43					1595.36						8817.85						16776.7
258.977					363.31					256.935					1212						1628.13						29739.2
234.466					447.551					988.02					1590.86						10181						28999.6
224.465					590.766					926.329					1290.38						8747.84						71.6377
238.417					589.75					1066.02					1420.16						10115.6						30621.5
270.465					571.791					1629.65					1159.03						9786						22868.1
182.465					582.848					951.049					1046.76						11694.7						25616.9
288.751					497.551					1136.02					1124.92						4687.33						31176.1
164.977					444.911					1032.76					1066.3						10198						40316.5
57.4882					426.25					949.377					1265.77						13448						25599.1
188.465					684.22					1341.85					1041.89						8431.06						22226.6
225.465					916.482					1137.15					997.774						8821.85						20068.5
182.953					523.508					747.747					1129.05						8139.58						18831.6
244.465					460.948					1192.65					1134.9						11832						32449
285.953					694.409					949.334					1404.16						10323.4						21933.6
165.465					578.723					192.868					1330.15						10473.7						19688.3
253.537					467.508					1311.02					1518.92						2571.04						23645.5
181.953					383.907					1283.09					1828.52						8544.3						37088
192.465					465.851					1142.42					1141.23						11398.2						23925
172.977					548.28					935.092					1401.49						6129.14						27369.6
258.977					281.31					973.691					1170.26						14722						31185.1
171.977					585.765					921.12					1438.53						4930.74						21609.3
228.977					639.146					462.817					1840.07						10431.4						15512.1
193.977					496.208					1323.76					1279.42						3929.3						26522.8
406.181					524.591					1164.79					2563.54						41.9337						21349.5
287.441					468.462					1356					1260.05						5091.34						30908.4
316.58					615.638					920.587					1541.82						9821.42						14516.1
190.977					406.079					1332.73					1631.98						2099.33						26030.5
286.465					482.994					1254.93					1234.47						4872.93						18171.2
145.977					318.924					1075.33					1195.26						14735.9						16496
275.465					835.179					202.401					577.001						9958.89						21145.4
156.977					522.508					1312					1173.12						1787.63						18353.5
138.465					374.876					939.863					1271.57						8600.52						20776.8
222.465					573.362					269.402					1477.13						10284.4						35902.2
224.465					568.38					1287.91					1671.21						6850.38						20222
172.441					390.525					1244.93					1277.15						6439.15						22314
326.794					433.812					626.347					1449.32						10961.5						20316.5
95.9763					665.409					1029.93					1447.29						13818.7						22271.9
251.465					754.709					1261.7					1622.99						5788.91						28115.6
247.465					459.551					276.402					1766.26						13239						24463.1
202.441					524.122					795.876					1690.41						7720.5						23943.2
224.953					680.577					650.575					1663.79						9714.16						27013
171.465					564.294					1425.14					1404.41						8507.64						18224.1
255.465					394.122					1113.19					1281.36						9816.12						10375.3
235.977					460.812					829.734					1099.47						9272.29						20991.8
215.465					480.165					1224.15					1195						6991.11						23979.5
233.465					497.211					1276.35					1475.72						6914.1						24210.2
230.977					401.119					1388.51					1482.43						6003.87						7501.2
254.465					410.118					988.882					1888.21						7944.91						27531.3
230.953					450.376					1317.39					1377.51						3624.51						1009.52
223.978					501.813					1096.96					939.517						11464						13723.3
219.977					138.406					711.19					1904.44						6516.85						20172.8
155.465					637.152					825.829					1380.83						11646.7						17913.9
204.441					461.508					1136.93					1343.72						13855.8						17049.8
258.263					609.894					962.377					1669.62						7499.86						23086.2
381.24					543.38					1267.96					1275.36						9619.35						24431.9
146.44					194.938					1138.62					1722.75						13588.8						5138.22
243.466					478.208					1328.28					1038.12						12560.8						28236.1
298.178					340.033					444.208					1620.19						8132.9						23397.7
223.977					499.719					1051.32					1386.49						2226.77						24088.6
195.465					421.211					910.206					1553.06						10741.6						19525.5
146.464					397.822					263.401					1488.29						6145.65						19765
345.466					510.208					751.957					1334.72						11258.4						34945.7
315.794					313.407					1060.69					1604.53						6849.38						21068.6
249.465					472.508					1057.69					1678.32						8603.73						24336.9
376.052					339.343					1052.81					1505.06						7685.09						33674.2
136.465					638.845					978.534					1505.56						11948.9						22501.4
245.929					487.465					1045.8					1342.89						7975.34						28879.9
238.953					286.407					1058.78					1189.93						6065.43						24743.7
209.465					622.066					948.191					1461.65						2930.65						24869.1
262.465					525.281					1177.85					1489.89						5960.57						35070.9
275.441					529.123					194.486					1323.62						10841.3						20768.9
164.928					428.419					1247.64					1306.67						20311						19947
167.977					523.813					1119.65					1418.27						5936.91						27781
331.923					513.376					1175.24					1167.19						12762.1						25348.7
211.417					498.634					460.131					1243.1						8411.13						31404.9
295.953					376.696					1209.32					1326.36						6902.68						25136.9
154.977					171.938					1356.44					2110.37						6539.33						31466.5
245.441					822.924					717.804					1657.43						13633.8						19430.5
209.465					438.079					1668.95					1185.45						14617.5						32876.1
617.987					462.25					753.504					2164.77						13071.2						16417.6
338.923					600.75					773.319					1001.86						1985.96						21613.1
175.953					487.419					1424.65					1209.85						13397.5						24474.4
241.465					622.851					862.705					1266.96						3059.66						23249.4
205.465					542.934					1185.62					1480.75						10586.5						27976.3
143.976					473.465					1582.39					1049.07						8107.69						19817.1
238.465					450.119					1077.92					1555.5						8240.8						22878.9
152.465					395.568					2192.38					1493.65						607.066						30727.4
163.977					469.823					1053.41					2097.81						11536.5						30308.9
135.976					520.634					1651.6					1997.28						7868.65						552.212
202.465					408.247					667.404					1267.32						5307.24						18994.7
245.465					549.762					1317.88					1412.25						4351.86						26989.9
238.465					554.508					1196.82					875.217						10822.5						27315.1
166.465					524.719					1036.28					1581.85						6284.65						23389.6
225.953					409.608					911.862					1505.25						6747.46						5529.02
216.977					487.551					941.277					1238.85						4257.8						67.9564
294.953					827.964					1513.07					1554.77						10073.8						29996.9
197.465					572.594					1035.98					1174.63						1707.8						17866.7
234.977					430.739					1223.31					961.702						12586.2						22716.2
243.977					464.508					929.105					1179.09						9605.79						19721.9
273.466					484.334					970.263					1557.02						6700.75						17326.2
241.092					395.394					1020.58					1584.86						3800.61						31217.1
229.465					500.508					1092.33					1006.81						8892.59						27046.6
195.953					487.251					1226.78					1334.59						9048.96						30722.9
197.441					635.75					1113.08					1746.16						7427.87						17215.8
261.441					528.805					589.532					1307.63						4877.02						35855.4
216.465					497.462					1088.01					1363.79						9500.74						12389.7
251.465					603.894					1182.34					984.86						7472.73						22233.2
168.953					483.911					991.22					1713.59						9972.53						26753.4
261.465					403.036					1024.62					1484.31						9670.91						16754.6
162.465					408.344					1472.52					1696.53						3347.67						20403
262.978					303.307					943.147					2353.18						6978.89						26348.6
205.465					599.594					1106.08					1150.05						7575.38						30381.2
417.923					753.624					986.577					1699.62						5909.64						27737.9
243.466					724.195					942.119					1430.98						7137.88						33249
267.466					196.874					1296.89					971.589						8839.6						32502.4
270.441					581.32					1116.26					1540.36						7569.21						24066.6
128.464					580.808					1219.75					1052.7						10655.9						17425.2
239.465					366.265					1484.29					1685.41						5018.97						1101.85
158.977					420.344					1323.96					1145.73						5384.67						32075
258.465					566.763					1465.92					1408.05						8988.06						60518.5
212.465					662.766					1158.19					766.444						8978.32						60518.5
276.929					378.343					1164.86					1173.26						9709.82						36328
224.977					507.551					1047.51					1487.76						8420.15						32822.5
202.465					629.934					1217.15					1244.16						3738.16						18606.8
218.465					332.875					1127.16					1678.32						9067.18						18844.8
148.44					672.852					962.776					2620.8						11658.3						23657.2
188.465					428.207					1421.58					1073.53						312.564						27514
346.954					385.953					871.876					1169.12						11640.6						37.9564
211.953					463.465					1028.56					1449.36						6642.92						31361.8
246.441					585.937					758.247					1527.78						2582.44						24013.6
311.306					853.91					1103.83					996.26						3767.35						27008.6
166.465					559.591					883.791					1644.71						2786.16						37.6376
249.465					721.406					922.834					1150.55						8566.56						15830.5
213.465					653.237					1386.76					1531.83						4327.05						25319.1
206.977					428.876					1047.51					1218.93						7413.06						3803.99
181.465					432.208					844.662					1120.52						10519.9						26584.7
474.418					383.864					1302.62					1352.56						9148.58						23753.7
161.977					279.407					1326.84					1570.92						7456.6						25455.6
293.466					1126.41					1133.31					1438.36						6605.33						25365.1
251.905					372.036					283.244					1529.89						9689.53						23388.7
271.953					340.267					1142.86					941.517						6536.45						25626.3
249.977					1105.17					1065.43					1165.72						7433.44						26500
212.441					412.779					1177.19					1223.86						475.908						10982
173.953					377.353					549.789					1272.86						9534.5						26039
165.465					646.877					1466.74					1602.41						5252.88						24346.9
161.977					536.888					1293.46					1475.18						11631.1						20683.8
212.465					619.894					1240.75					1653.19						9479.24						23107.1
253.953					525.616					851.662					1198.49						9546.45						26719.9
266.006					367.439					1239.78					2645.13						12294.1						22632.6
289.978					476.377					1378.26					1316.45						5713.56						22232.1
236.465					415.354					976.034					1733.1						793.053						21948
247.465					381.353					942.262					1518.25						6610.28						679.427
243.465					346.818					1068.05					1604.23						9225.86						14081.3
256.466					394.344					1165.84					1294.95						3867.38						122.957
145.465					506.545					954.862					1014.43						5339.85						15279.8
203.465					490.205					1061.86					1612.18						13708.5						25533.2
223.465					573.38					863.105					1077.67						6603.49						42.6376
224.953					620.228					910.448					1312.06						8011.18						41277.7
213.465					568.826					955.677					1292.69						2182.28						41.3189
253.465					380.01					1266.75					1312.32						9682.18						18216.2
310.435					1321.46					1073.89					1516.35						2111.6						25423.7
178.977					309.838					1358.89					1804.56						10463.4						23122.2
180.441					376.72					1012.56					1194.26						10781.1						32794.3
287.22					441.72					1030.52					1182.68						4191.88						23554.6
277.708					443.056					1367.14					1396.71						8551						23660
220.977					467.31					1279.75					1546.25						5127.2						21270.6
160.977					577.911					1171.06					4336.45						14398.1						29321.4
406.923					514.039					631.132					1536.15						10916						19276.5
115.976					438.73					1179.16					1278.43						7963.26						51.6376
214.953					469.37					1069.85					1069.77						5188.07						14050.1
181.953					454.396					1197.04					1299.78						9147.41						43.6376
277.708					509.354					925.291					1876.56						7154.54						19665.6
209.465					486.571					1215.19					1273.36						10046.5						13236.9
265.466					534.252					1163.91					1668.27						3749.18						12668.3
1072.06					227.135					1352.49					2073.59						7385.78						5373.29
269.953					339.093					109.657					2458.31						3255.09						21281
296.954					354.881					1147.75					1432.71						3332.99						19911.2
206.465					355.127					1216.41					1087.37						8044.9						27108.2
156.465					438.968					1035.81					1574.39						9781.99						26234.9
165.953					386.396					1154.21					1491.49						1627.64						20891.5
284.349					414.882					1361.52					1353.1						925.391						54.6377
138.44					529.482					1042.55					1800.02						10849.7						29283.9
179.441					547.911					921.362					1424.12						6525.41						27841.3
229.441					516.013					1032.93					1719.58						9020.13						35401.3
319.666					493.654					899.533					1683.6						7377.04						34293.2
194.953					382.156					1378.34					1240.3						9023.57						22735.7
231.977					319.126					960.848					233.085						7321.87						23466.4
232.977					430.396					1146.82					1268.5						8597.62						18877.6
162.977					338.881					1123.83					1401.42						7362.18						24983.9
262.929					457.225					1037.28					1727.96						8131.82						18304.9
187.441					496.354					1188.05					1197.93						3475.32						9090.45
187.465					347.07					1230.37					1889.41						7567.26						25529.4
172.977					512.08					953.109					1708.49						9297.55						24806.6
229.465					360.241					1021.68					1345.93						11568.1						30532.1
153.977					606.185					1395.42					81.0839						11319.2						21358.7
187.977					579.911					261.727					1077.25						8174.37						30934.6
141.952					606.597					547.127					1062.16						6881.51						30967.8
195.465					531.44					1216.4					1455.27						8197.69						28617.3
180.953					564.785					1447.3					1224.38						9922.94						24138.9
179.465					339.307					1597.96					1327.66						8725.33						28720.9
230.977					641.597					1347.04					1477.31						8826.84						20708.4
237.465					415.053					1647.92					1527.02						11624.3						40247.3
204.977					518.125					851.594					1330.28						8169.88						30025.9
160.465					515.568					2533.54					2116.82						9842.34						23051.5
191.465					431.053					645.773					995.33						4880.4						20639.1
167.465					358.436					561.084					762.86						10354.8						43.6376
155.952					455.268					1088.71					1391.46						10484.2						32175.5
258.465					722.743					445.977					1810.23						12869.7						27139.6
169.953					432.225					894.229					1458.13						8528.3						25271.7
251.465					592.526					1147.43					1976.16						10804.7						24385.2
157.465					320.188					1202.35					1589.17						7153.03						21951.4
87.9763					331.595					124.09					1721.68						9611.71						24124.3
321.794					439.522					917.809					1296.66						6424.08						20862.4
198.953					357.967					985.615					1436.9						7704.93						26385.3
280.465					167.594					1147.66					1539.23						9903.08						13366.1
226.465					624.74					916.72					1265.32						7005.81						23687.9
261.006					561.885					300.728					1400.05						10255.4						28530.4
290.953					627.997					811.337					161.085						6765.28						14802.7
217.465					649.997					255.09					1182.8						14294.5						33071.8
311.466					575.528					1250.17					1920.11						10128.4						19368.9
218.977					932.542					520.912					1360.83						11493.9						46.6376
288.666					355.189					1226.99					1087.7						9837.82						13785.7
236.465					406.396					477.818					1126.55						2587.59						18069.4
95.9764					489.039					1002.25					183.626						12339.8						23560
147.928					456.127					1002.68					1961.82						2859.2						17767.1
153.977					515.525					1070.22					978.046						3515.46						24693.9
109.976					479.525					955.472					1332.99						1604.22						19405.5
267.58					433.327					1586.48					73.0839						9794.95						22413.4
424.736					919.67					936.952					2041.22						8093.22						13426.8
252.465					1027.27					1204.16					1449.87						9187.58						23751.7
187.953					436.079					1158.07					1995.25						10495.8						15259.7
188.953					365.607					1093.26					1520.96						9193.48						26961.2
253.977					419.584					1128.24					1724.68						1225.5						19124.6
240.977					509.628					1079.5					1217.61						6999.87						13573.3
192.465					395.127					966.821					1371.98						8720.73						31849.7
138.976					657.94					1106.94					1735.69						7734.16						13120.4
343.88					647.297					688.37					1643.53						3769.09						755.456
298.978					394.482					72.4524					1231.26						8904.19						39.3188
207.977					368.413					579.964					2160.92						7548.13						11822.6
214.465					384.539					1038.13					1441.92						9549.75						34881.9
165.465					603.254					1359.23					1582.36						9981.07						43.6376
238.953					478.252					935.746					1443.2						2465.59						27818.8
198.953					428.353					1282.13					1471.3						6928.65						19622.6
266.465					422.31					211.453					1362.54						7241.91						22891.4
226.092					602.245					1142.01					1378.55						4851.48						17817.1
208.441					578.871					1221.95					1525.02						3430.08						24865
157.977					619.126					1151.77					1592.7						8405.63						24857.8
230.465					470.199					1284.78					706.731						3802.9						27009.5
178.465					248.178					891.312					1422.13						8895.9						30005.2
216.465					1407.31					1268.5					1861.32						7866.22						18289.8
240.22					483.413					870.337					1244.46						13140						26137
52.4882					254.064					1225.16					1700.32						6985.02						30380.8
184.465					439.353					147.816					1279.98						2916.8						31213.9
185.465					499.659					956.615					1362.97						1568.74						17939.1
162.465					455.72					230.453					1684.91						6523.66						15467.8
227.953					635.34					1285.34					1028.03						8887.24						29775.6
274.465					582.783					777.865					1286.23						2758.07						20367.9
234.953					496.782					1265.65					963.731						7916.18						21314.9
271.465					446.189					544.258					1663.99						19018.9						20733.1
267.465					508.659					1163.92					1258.2						7330.91						22284
242.092					524.954					1026.79					1554.59						2158.62						22249.3
165.977					444.499					1206.27					1527.43						4162.07						24899.7
167.953					512.397					560.007					1493.33						11494.7						11797.6
235.465					453.439					956.635					2118.78						8771.24						8150.44
215.977					394.181					1619.09					1627.69						7354.05						13724.4
194.465					454.585					903.209					1490.48						8342.01						27170.5
282.465					451.37					1012.37					1455.95						6815.9						32610.4
129.976					538.8					847.483					1723.68						8717.31						19852
184.465					416.327					1096.24					1503.93						11999.3						24492.3
270.441					563.082					359.248					1341.75						12712.5						25263.8
189.953					349.307					1265.36					1217.4						10922.1						29260.2
178.465					389.796					1120.12					161.084						10008.5						29552.5
168.953					766.944					1134.94					1324.53						9037.22						43.6376
156.977					454.499					593.578					2052.04						24394.8						25113.4
192.929					584.528					1204.24					3417.81						6693.87						16054.9
185.977					345.658					1168.84					1400.32						4778.92						21021.9
211.953					444.439					1313.23					1798.39						6866.34						20875.9
318.923					307.064					1161.92					1597.29						53302.3						30468.7
269.953					410.822					1036.9					1790.66						8684.85						14004.7
188.465					354.582					869.957					1391.23						4282						25194.9
265.977					523.885					1127.83					1435.93						2472.26						8953.69
181.977					435.199					1432.92					1598.23						8274.67						23240.2
222.465					616.314					1219.07					1339.22						9469.67						11518.3
196.465					507.482					960.109					1535.59						2150.24						43858.3
202.441					438.456					1287.89					1333.63						7518.86						24292.5
238.977					520.457					1298.18					1917.58						3105.87						25562.9
304.58					447.353					840.651					1509.9						7554.46						43764.3
279.708					500.168					1084.98					1519.89						7481.43						10142.7
113.489					370.596					1708.97					1148.63						7341.6						53953.7
211.977					413.608					986.766					1096.42						9514.27						27400
256.537					482.054					956.509					1655.69						11782.8						19608.4
217.465					572.511					1157.67					1649.91						10637.8						23849.2
133.952					664.112					1501.96					1518.26						8580.25						26389.4
172.977					479.139					1242.88					1336.16						3362.28						22227.9
253.465					373.782					1018.55					1545.69						6798.47						21066.9
165.977					508.756					912.466					1373.7						10555.9						26665.8
286.178					400.096					819.423					1407.53						5672.65						31024.1
185.465					404.439					1390.49					1723.66						22707.5						37399.5
235.465					422.525					890.208					1103.76						3111.48						21601.8
170.441					517.568					1283.79					1209.89						11082.6						52.2752
216.465					543.825					1013.7					2185.37						7309.47						33480.2
239.465					401.839					960.344					1518.45						7547.95						27123.9
248.465					427.456					1003.6					1410.49						13352.7						20804.6
288.58					372.224					1037.15					1406.83						10774.5						24538.4
209.953					414.267					1621.35					1481.98						7772.54						62.6377
210.465					599.783					825.466					1389.71						11356.4						33013
253.977					410.882					1096.7					1463.71						8639.74						21242.4
268.58					521.825					1230.89					1256.06						10723.5						20423.1
214.953					325.064					1227.72					1661.02						10050.7						26742.7
155.977					534.311					949.386					1546.28						9227.39						24976.3
203.977					339.127					955.258					1151.68						5205.8						26234.5
234.465					513.311					1236.58					1737.63						2779.63						26270.7
223.977					488.252					1277.65					1175.76						8542.74						11638.1
263.465					431.658					1198.16					1324.17						5498.09						21029.4
127.976					468.097					1240.92					1386.08						7755.75						25572.7
199.977					608.4					1272.44					1506.89						7753.15						8827.78
241.953					696.255					1546.03					1396.28						12191						13392.9
114.977					494.67					1332.76					1444.7						3728.64						28265
186.465					628.826					1064.73					1962.36						9566.05						25286.2
258.465					634.526					229.09					1327.3						10473.8						22661.7
310.466					511.928					728.285					1763.76						4763.49						15972
195.441					555.868					989.215					1181.75						11910.6						22048.6
183.929					373.027					1100.07					2369.11						12670.4						14541.3
299.837					463.19					1100.16					1640.95						8799.33						22213
229.465					562.957					1222.57					1590.11						22948.9						4561.24
235.465					672.083					991.893					1643.96						4504.77						24966.8
218.953					498.739					1397.53					1752.88						8887.76						116185
227.465					355.596					145.364					1208.3						10216.8						25936.7
279.978					353.596					1126.22					1123.59						6004.44						18436.4
221.465					648.426					709.307					1323.18						6522.01						27306.1
184.465					318.127					303.314					1193.22						8342.67						17297.5
204.441					480.659					1183.73					1331.78						9340.24						24237.8
270.441					613.86					1326.1					976.731						8570.65						22098.4
273.953					460.739					1102.94					1412.36						8716.03						26842.9
212.465					442.413					1035.05					1213.85						11795.7						24311
265.978					447.31					1226.53					961.603						9390.25						14910.7
697.556					495.696					1176.45					1202.85						10218.7						20658.7
230.465					426.127					1636.48					1227.68						6613.57						22740.4
177.465					593.168					290.816					944.431						10254.4						19130
208.953					503.268					1312.32					1285.29						2993.49						6443.28
225.465					224.126					1386.97					981.817						14341.4						21541.4
173.953					431.096					1296.79					1538.86						10675.6						21900.4
193.977					153.594					1064.43					1425.22						14268.9						23007.3
575.621					379.31					1053.55					1176.23						1856						30464.1
206.953					690.169					1357.04					1598.93						8364.88						8176.78
249.977					980.571					1192.82					1950.85						7839.7						23319.9
177.953					438.242					1036.17					1158.99						4379.81						23332.7
226.953					603.057					1287.83					1329.29						4207.2						25618
306.466					420.036					1573.88					1692.46						5110.16						24440.2
240.466					582.597					1248.81					1976.21						9967.5						73.9564
224.977					1134.85					1319.85					1132.6						11246.6						25669.7
219.465					419.439					1219.37					1479.62						9153.3						28120.7
235.465					520.225					753.714					1558.23						2621.07						10793.4
112.976					440.413					874.551					1104.36						12743.7						18737
95.9763					400.658					1349.76					1146.72						12251.2						18128.8
216.977					400.658					1012.47					1528.42						14535.7						34769.5
122.952					436.189					1348.36					1841.44						10988.2						36432.7
248.465					577.043					79.7263					1218.72						12667.8						29060.2
302.58					412.658					477.818					1560.15						6651.22						24195.9
215.441					405.241					1002.25					1437.63						10019.9						31500.1
143.465					2764.07					1002.68					1181.68						10670						20177.2
208.465					421.839					1070.22					636.659						11773.5						30734.8
159.44					513.721										1460.36						7094.23						24639.5
182.465					522.483										1594.06						9037.31						21767.4
384.955					495.782										2211.88						2209.02						23170.2
131.465					497.211										1691.75						3541.96						25429
242.465					513.773										1141.19						11667.3						23793.3
184.977					495.739										1351.82						4356.69						35325.8
254.953					523.568										1239.1						11257.8						30463.9
227.465					776.029										1332.58						8357.09						30005.7
175.977					468.499										1594.85						5935.88						28322.4
249.953					321.138										1601.58						6255.16						21392.5
246.465					725.6										1841.91						3959.41						31773.3
233.465					643.34										1162.17						8814.43						15203.3
267.953					467.353										1436.92						9756.31						29072.4
245.465					578.125										1460.13						10746.4						37.6376
233.465					716.722										1513.65						10582.4						17281.3
310.794					486.189										981.817						7710.32						27113.6
197.465					342.796										1171.78						8432.02						23537.6
241.977					357.924										1221.53						11353.3						26748.1
132.464					522.656										1607.69						5953.88						23607.5
214.465					406.37										1551.32						9530.05						4611.27
184.465					606.211										1802.85						6692.7						28573.7
161.465					706.558										1526.98						3247.64						24636.2
183.977					511.226										1543.11						12034.2						21732.3
246.465					457.739										1565.15						5462.04						28660.7
311.751					479.396										1319.78						3761.6						7332.91
287.466					504.739										1506.89						2454.35						26924.5
197.465					445.329										1259.43						7076.84						23508
230.465					630.363										1347.16						11513.4						28965.4
194.465					368.643										1319.99						10993.1						27520.9
298.978					529.059										1501.06						7991.83						14625.7
196.465					359.072										1583.19						9667.09						10090.5
295.466					462.31										1526.93						8284.33						14026.7
185.977					166.904										1476.63						8231.81						17044.1
209.977					504.201										1376.53						9191.39						26564.3
211.465					666.783										1279.47						11225.5						22703.4
246.417					352.81										1274.02						5791.81						14593.9
237.465					582.759										237.627						6181.35						28745.3
202.465					629.983										2136.02						4131.18						20987.2
190.977					496.262										1209.93						12600.7						23514.9
259.953					524.653										1259.5						11761						27243
254.977					743.317										3603.19						9586.57						12978.8
294.441					1078.93										1494.35						7240.66						29097.9
189.977					956.656										1589.32						12002.7						27465.1
255.623					278.905										1989.09						5778.2						15973.2
255.978					740.726										1595.3						10553.8						25396.5
219.953					454.115										1493.5						2052.98						27748.5
251.465					342.358										1578.02						9063.57						21355.1
737.728					366.809										1951.92						8608.38						22356.4
197.417					548.654										1229.06						14139.2						54.9564
197.929					439.235										1389.53						10013.5						25207.4
186.929					803.574										1189.24						5837.67						16974.7
317.466					482.182										1222.14						8338.01						24174.9
193.465					593.759										1134.59						12716.6						27019.6
277.708					433.329										232.794						12227.7						59.6377
256.465					368.809										1763.31						7223.09						33333.1
303.923					434.235										3201						11059.7						25530
199.465					584.845										1396.98						7926.82						19525.1
206.465					393.81										2780.63						9999.07						22423.6
184.465					460.181										1746.22						11325.6						48.6376
233.466					352.063										1682.11						20615.7						27078.3
184.465					693.369										2072.71						10120.4						26960.7
193.953					388.809										1621.25						13330.1						37201.2
133.976					547.739										1199.93						7694.28						30199.6
193.977					529.178										1488.25						8945.57						42718.6
188.465					408.244										1558.06						9405.29						15404.8
372.88					439.73										1630.14						9160.91						27587.6
285.978					625.888										1557.76						8952.41						18408.9
128.952					514.158										1618.13						3290.51						8200.59
215.417					370.344										1515.89						9173.26						26278.9
191.465					401.877										1188.93						6188.31						22631.1
183.977					428.01										1075.29						12271.2						14387.2
190.977					452.01										1424.46						5022.6						28057.1
199.465					433.165										1464.85						7643.46						24947.7
142.977					543.244										1419.13						7325.13						30040.2
267.623					451.924										1405.32						6295.43						25571.1
97.9763					493.844										1437.13						8413.5						17421.6
180.465					481.253										1664.58						4261.78						25966.4
177.465					330.809										1465.75						12611.1						25599.5
167.977					216.905										1276.77						9582.01						16884.2
222.465					569.654										985.159						9165.69						11117.7
187.977					474.158										1730.68						8413.35						33984.9
206.441					571.587										829.016						5834.63						23879.4
260.465					544.23										1319.29						2143.54						10381.5
235.905					1281.05										1878.69						6989.5						25417.6
222.465					775.264										1465.22						9731.45						10354.5
149.977					519.096										1362.73						3386.28						25522.2
199.465					549.864										2388.28						7329.71						31129.9
260.465					629.768										1565.63						12185.9						16244.7
191.465					393.713										1014						9198.09						27127.7
316.929					434.73										1062.33						4627.9						13307.1
179.465					518.673										1308.82						4488.15						29956.8
189.465					413.261										1142.97						3381.02						24521.9
252.466					270.905										1106.43						12269.2						12964.6
253.465					912.089										1848.46						8009.26						28750.7
189.953					623.588										1623.18						10079.6						25521.4
217.977					490.415										1189.99						6179.7						29118.5
180.465					585.459										1335.82						11016.2						44.4425
225.953					651.872										1418.23						8485.48						19600.4
184.953					625.716										1011.99						9381.46						19749
243.465					537.373										988.474						7302.49						37712.3
125.464					792.217										1526.59						7569.11						20927.2
249.465					490.165										1485.31						3344.34						12652.4
224.953					729.217										1298.53						7533.16						28189.2
292.466					92.904										1755.79						9202.52						21222.3
290.441					535.501										1601.69						5736.25						37419.4
303.466					430.261										1988.12						5982.18						9454.56
236.465					652.974										1588.22						7239.66						26498.1
251.953					526.373										1315.1						7045.02						46868.7
214.953					276.6										1189.43						2475.99						27848
230.465					333.906										1412.33						9119.13						24077.5
175.465					328.32										1598.45						2412.04						27609.4
222.465					354.234										1077.16						10102.2						28979.6
196.953					172.453										1549.83						12290.1						17917.2
266.58					497.544										1977.78						8597.38						24387.5
318.794					552.166										1885.81						11617.6						18386
219.953					457.287										1919.78						2800.67						27876.8
1279.22					467.419										2015.22						10937.8						22937.7
137.928					397.944										2271.97						6621.87						40735.7
395.009					389.667										1116.43						7096.06						32474.5
209.465					429.267										779.402						11943.6						42.4425
235.465					419.749										1463.63						9080.45						11259.8
214.465					910.313										1109.86						3827.34						16495.4
179.465					640.845										1179.48						12005.5						26023
256.977					598.587										1389.96						8099.94						31747
192.465					380.115										1777.25						10970.5						25458.3
94.4643					688.788										1363.08						3116.91						24415.2
250.465					385.81										1787.18						6448.88						24377.4
226.465					379.81										1433.88						14140.9						24754
208.465					292.905										1118.55						7158.23						29809.2
227.977					455.072										1538.56						6354.03						19319.2
214.953					495.987										1419.1						1512.07						7818.02
664.868					360.358										1139.69						5899.54						13747.3
256.977					338.406										1396.05						3790.95						21421.3
209.953					455.33										1252.65						10301.4						22857.8
266.465					479.201										1826.35						47.3899						44609.6
255.465					447.716										1719.66						1973.42						22406.5
222.465					458.901										1631.45						7752.71						26591.2
280.466					386.772										1515.52						9547.93						35551.3
285.466					409.713										1149.69						10592.6						29694
276.466					348.129										1821.84						6931.56						27054.4
244.465					523.165										1180.33						9330.95						20384.1
316.466					446.713										1502.45						9288.16						28115.4
238.465					851.55										1624.79						10476						26361.5
228.953					436.815										1200.83						9402.29						19804.1
219.465					362.192										1312.45						10177.8						36717
208.441					560.596										1099.16						3332.81						19779.8
260.465					881.836										984.303						12774.3						14864.3
192.953					492.714										1774.09						8300.1						25089.9
268.953					542.187										387.1						8598						22143.9
270.178					514.339										1311.45						9351.55						24653.5
253.977					554.416										1684.88						12480.7						25273
200.465					666.831										1330.21						10274.1						19658.7
185.929					495.587										961.917						14276.9						25822.7
127.464					579.511										1175.17						9496.8						29371
376.954					538.825										1262.09						6087.75						7626.17
184.465					574.759										1165.4						9701.22						29031
277.708					519.617										1402.06						77.39						22880.4
222.465					679.145										1402.88						9541.02						8450.34
238.977					323.906										1558.96						6463.33						16602.9
230.441					457.858										1201.98						8263.37						25868.1
189.977					367.158										1234.08						10116.8						27482.7
172.953					596.545										1069.16						15154.3						21470.4
254.465					151.904										1535.42						6656.04						29779.6
198.929					641.111										1228.12						10138.4						28210.5
413.418					572.468										1324.45						7156.05						28377.7
185.977					674.917										1394.02						9204.84						23432.2
193.441					469.81										1870.56						2072.51						24046.3
130.928					508.21										2267.58						1418.37						22412.5
145.489					548.245										1523.19						7581.17						17561.4
249.465					579.802										1734.46						9519.23						27804.4
170.465					500.676										1319.32						9064.83						25866
216.977					358.234										1165.3						6470.06						20792.7
252.465					346.129										1627.88						7609.03						25958.4
233.441					576.725										1846.38						8452.44						16551.3
132.952					450.165										1460.26						8754.07						31.2213
245.465					575.416										1627.16						5120.94						15079
256.465					374.713										1434.99						63.5593						25588.9
209.465					401.32										1422.79						6612.7						21558.6
184.465					551.759										1273.2						8196.72						55.6638
228.465					531.353										1594.86						5844.8						96.6639
211.465					345.358										1576.66						7875.35						17095.2
299.837					625.231										1571.49						9157.34						21875.6
131.976					393.713										1764.82						10233.6						27494.1
205.953					576.697										1398.63						9541.44						26376.2
224.465					405.01										970.502						1706.49						19402.6
246.977					404.81										1584.58						8552.17						25822.4
213.929					544.145										1189.73						8567.99						17854.8
241.977					478.158										1793.44						8198.95						29584.6
217.465					568.554										1424.09						4143.41						33114.9
169.465					425.329										1046.39						5444.27						26856.9
143.465					508.382										1860.06						8298.84						31472.8
237.465					292.514										1674.92						9464.8						26543.8
252.465					500.396										1271.28						20668.5						25421.1
187.465					619.617										1669.83						3673.66						13309.9
273.465					526.714										1521.06						12805.4						22503
232.977					404.943										1413.78						2742.76						20472.3
198.929					468.696										1664.12						12084.4						26517.2
223.953					514.373										1730.66						13932.4						22548.5
207.977					448.181										1817.35						7402.26						65.4426
263.953					367.358										1902.78						8182.91						20721.8
289.006					421.01										1571.86						8403.45						28247.4
258.049					531.653										1555.73						8237.98						11485.9
183.465					507.973										1535.73						3556.83						40.4425
237.465					403.286										1249.56						290.5						25931.1
150.952					565.725										1559.49						10340.9						57.6638
221.465					495.267										1277.06						5414.79						24967.7
140.464					773.455										1394.96						3628.1						22826.4
156.977					733.131										1885.45						5956.75						30294.6
249.977					541.439										1171.16						11739.2						23860.2
259.977					450.987										1459.08						91.3901						35617.5
250.977					867.789										1072.83						8472.91						31110.9
227.977					358.892										1714.62						8380.92						26032.1
168.441					548.082										2055.35						6571.27						19297.1
264.465					549.714										1258.2						6146.13						17633.7
225.465					475.901										1432.03						11991.8						29216.2
230.978					416.967										1203.08						2793.01						136.664
229.465					484.878										183.543						9309.34						24246.3
158.465					522.139										1154.68						6490.58						21528.6
165.977					419.81										1112.02						9953.28						19769.5
224.953					289.26										1586.71						4402.03						29368.7
276.465					412.967										1452.59						4931.13						48919.7
261.466					486.262										1490.09						9809.27						26986.9
200.441					570.62										1856.36						1644.66						24668.9
281.466					491.458										1887.69						4437.2						24993.5
216.953					501.739										1695.21						10576.5						25459.7
189.465					438.072										1525.19						7810.48						9651.13
242.465					516.262										1711.74						5084.33						20104.7
178.465					498.33										1418.25						7602.55						19934.4
220.465					523.116										1575.23						2986.87						12319.8
222.465					460.287										1765.18						11574.1						22832.6
157.465					257.905										1453.63						8575.22						24360.2
531.738					454.072										1223.5						9232.96						18252.6
176.417					415.81										1616.68						2134.19						15447.3
193.465					380.81										1596.63						7385.83						22064.3
237.465					375.809										1614.21						6871.47						27159
433.207					350.343										1540.68						6799.03						21107.7
212.465					388.072										1518.26						8947.23						24875.8
308.751					519.116										2284.29						7231.88						19770
304.88					504.617										1164.73						6535.41						16862.9
264.466					556.166										1253.42						2612.47						26491.4
208.465					310.32										1586.61						9319.03						16951.4
202.465					368.149										771.444						9894.55						29363.3
273.465					500.415										1269.77						7592.71						7798.48
243.978					468.505										1580.63						9781.3						23605.6
158.465					445.653										1564.42						10561.5						23183.1
205.977					532.525										1086.37						7505.12						23912.7
186.417					509.287										1354.57						8088.65						24586
292.22					419.81										1473.39						21280.8						27693.3
262.465					410.01										1098.32						14518.6						22250
413.394					390.261										1300.37						9320.62						22699.6
246.977					554.973										1553.09						11444.5						14407.8
281.953					548.468										987.689						5525.78						53.4426
122.976					315.357										1514.89						7117.33						108.443
149.465					380.558										1337.58						14113.8						52.1062
212.465					669.831										1160.7						6535.06						15838.1
161.953					571.416										1941.51						8073.65						19716.8
237.441					540.201										1880.24						2179.33						38.4425
252.953					420.01										1500.43						4169.39						18971.8
122.464					592.587										1870.99						10017.5						32548.3
189.465					499.415										1342.75						8854.67						41.2213
198.977					451.944										1558.6						8123.72						10216.9
256.465					386.81										1688.66						5679.12						17409.7
374.752					685.059										1674.58						3510.92						149.443
280.58					614.682										1314.73						11340.9						21863.1
243.977					528.653										1384.65						15105.2						25466
209.929					456.815										1984.12						9051.4						23957.4
303.794					554.382										1599.32						9847.03						15546
226.977					865.561										1469.8						7751.79						30431.6
294.921					582.868										1946.96						3108.73						14281.9
265.494					495.548										1287.28						4162.81						21420.6
196.953					478.987										2573.01						7040.07						26233.3
253.465					562.459										1016.23						12615.8						21597.7
177.977					858.984										1651.85						1893.13						12403
251.465					396.52										1029.95						2261.85						34784
251.929					449.115										1486.06						2237.89						20310.8
230.977					357.686										1502.46						2525.02						27145.3
283.978					460.901										1322.16						10452						25997
253.465					718.865										1860.65						3578.21						9219.28
213.465					445.261										1881.37						4278.63						53.4426
219.465					113.452										1475.09						8232.09						33979.3
225.929					561.887										1238.29						7395.86						24857.5
248.58					267.191										1192.43						10972.7						32050.3
249.905					607										228.085						5292.43						22040.7
163.977					541.073										1258.02						4528.01						21330.9
310.794					840.432										1272.46						1263.23						24794.1
190.465					514.914										996.746						9741.94						19484.9
194.465					598.716										810.016						10292						22691.2
242.465					425.165										1288.2						6928.27						27766
282.751					495.987										1396.01						3482.68						38143.8
192.441					576.587										1315.4						6569.84						30995.9
183.953					429.686										311.215						6866.1						75.6638
243.465					382.358										1760.31						2933.04						25397.8
174.977															1168.86						8549.15						22330
158.977															1015.26						8048.02						24688.2
132.976															1225.65						7284.34						36842.6
159.952															1242.19						5508.02						22356.1
147.465															1038.39						2666.52						27763.2
187.465															1254.35						6150.28						24816.1
285.466															979.96						8646.52						22480.5
229.977															1706.12						8525.02						31948.9
164.465															1054.3						7760.95						17098.9
221.953															1643.05						12361.5						20261.8
218.465															1382.45						11729.6						25354.4
122.44															1451.99						9683.58						21217.1
187.465															692.702						5758.18						24302.3
152.465															1765.68						9255.37						17132.9
167.977															1105.72						12165.8						29492.9
139.464															1271.62						8410.38						11924.3
117.976															1493.42						3441.52						32521.5
272.708															1296.75						6965.39						19158.3
261.465															1122.42						5894.05						15602.1
202.465															1227.81						4752.3						27235.1
136.464															1126.56						23455.9						13698.5
200.465															1314.82						3760.64						45.4425
300.953															1573.61						9397.7						41720.1
280.466															1635.88						7558.83						10704.8
238.977															1324.95						7960.98						29287.9
250.049															1848.35						12860.5						21479.4
261.465															1163.65						10424.6						30291.2
131.489															1482.03						11440.7						8228.17
209.465															1675.58						192.795						19112.7
272.666															2092.27						9559.27						28314.7
253.465															76.4997						13523						490.424
243.465															971.647						5734.49						29622
215.953															1211.89						9998.8						16952.8
219.465															2355.67						8044.49						6228.53
182.465															1289.22						9085.77						51.4425
246.465															1386.53						6364.31						4440.18
123.203															1398.88						10288.7						28000.7
175.407															1238.76						6219.72						22003.6
205.407															1465.12						2319.64						20163.6
200.204															2888.53						13101.9						15656.1
141.407															1003.6						14885.4						21701.9
198.204															623.317						4785.46						22451.3
229.008															1130.58						10500.4						26623.1
259.806															262.915						10972						17179.4
193.204															1528.46						13116						31651
167.805															1322.59						12752.1						20730.6
132.805															1532.96						7058.05						26747.3
496.822															1505.18						13300.2						30440.4
383.221															823.418						4113						19286
297.205															1425.42						7629.07						19729.4
195.805															1093.56						8281						23364.4
135.805															518.573						7049.09						29390.5
201.204															1247.91						2137.52						88.4427
172.805															805.261						11405.7						43.4425
177.805															1316.2						6200.88						17975.3
232.806															942.047						9149.24						31806.5
272.806															1134.69						10965.1						29935.8
209.204															1152.83						3151.79						21281.6
191.204															1802.79						12409.7						26174.6
246.806															1003.06						10918.8						25032.7
320.806															1389.91						5529.85						14754.6
239.204															1526.76						5301.86						22257.3
189.204															1238.06						10347.7						23872.3
148.407															1196.63						8807.35						27815
187.61															1274.92						7491.32						18002.7
220.806															1511.94						12889.8						24680.3
226.407															4209.54						10118.5						35496.3
148.805															1097.39						10032.9						27614.2
188.407															1044.05						6989.84						21251.9
230.806															1324.5						5109.26						32113.8
186.204															1350.8						11668.5						21228.3
328.135															1193.82						10123.1						28497.8
255.407															1961.37						8515.29						24459.1
276.806															1385.53						9671.82						30038.5
138.407															1318.49						9558.95						19540.8
156.008															1800.41						9053.73						25452
186.407															1658.19						8345.62						31531
242.806															984.276						8773.32						30322.8
184.407															1486.26						10807.5						26527.1
188.805															1316.36						4701.12						30271.6
416.35															1782.97						4291.88						18376.8
170.204															1368.03						10316.5						28183.3
103.61															1494.21						8086.66						24694.5
228.806															1257.82						9328.54						21408.3
194.805															1384.99						7402.5						19557.3
160.204															1137.93						12241.9						21663.7
425.393															1269.38						5617.74						23558.4
185.805															1432.95						7349.11						21281.5
167.805															1482.46						12149.5						40.2213
226.806															1675.98						6347.31						16680.4
177.204															2001.78						4639.35						22280.4
198.204															1027.76						5852.69						19520.2
220.806															1617.95						5685.51						24095.2
187.805															1290.56						7360.8						31518.2
308.006															1408.92						5472.16						10410.6
146.805															1666.49						8374.65						21466.3
211.806															1283.46						3841.61						19261.5
265.806															1323.82						8251.65						16949.6
219.806															1589.76						9339.58						20995.3
69.2033															1057.12						3934.27						27768.3
212.806															1522.12						13236.1						18755.3
278.092															1990.25						9549.01						23095.5
217.204															1100.29						11324						17192.3
192.805															1771.99						7598.02						24696.4
149.008															924.347						13454.2						27371.5
223.407															1748.38						4828.58						30681.8
197.204															1022.42						8655.02						30222.4
187.806															1000.82						11566.7						22120.6
259.205															912.347						7456.32						23871.2
183.805															1058.08						8007						34279.6
111.805															1224.55						8896.84						24966.2
215.806															1277.48						9853.64						23206
184.805															2847						7200.69						21962.9
182.407															1697.82						12551.6						3226.74
209.806															1064.28						8313.18						22157.8
199.407															1343.73						8472.61						54.4425
209.806															1697.71						2387.18						21490.3
258.806															1462.92						10110.7						27983.7
139.204															1466.89						10351.8						22643.7
133.204															1405.25						8995.83						14859.1
295.405															1214.93						7612.09						21357.5
234.204															1887.78						8526.98						28279.4
266.806															1337.58						9661.64						24799.7
257.407															1356.82						7466.4						25781.6
240.806															1649.52						1175.37						16251.6
205.204															1150.78						55153.2						31233.6
222.204															1241.28						12971.2						23698.1
266.806															1361.76						9461.18						21969.5
195.008															1433.41						11253.2						32329.2
162.204															1608.51						11293.7						34354.7
220.204															1628.15						6722.93						18983
187.805															1623.59						6339.4						21159.7
128.805															1201.73						2824.26						26908.4
174.204															1393.91						11278.4						37780.2
162.805															1065.16						10019						26112.2
158.805															1410.38						7490.53						9401.83
156.61															1615.52						8696.51						19320.9
149.805															2053.17						8263.15						25241.1
173.805															1508.76						8794.81						30226
167.204															1351.55						11347.8						20127.6
171.806															1337.99						8773.45						17956.3
182.805															1638.32						8706.15						20642.9
246.009															1721.58						10083.7						15455.5
176.805															129.999						6300.18						29531.9
228.806															1767.82						10494.6						20554.4
209.806															1201.26						7166.46						27077.5
123.805															1189.72						8332.3						25607.9
199.805															1151.75						6569.65						17965.8
207.204															1517.31						6054.21						25515.2
152.805															2680.34						10350.3						14489.2
305.408															1925.78						7837.33						36603.1
180.805															1374.49						5405.07						29699.2
197.204															1125.42						3662.77						23778.3
195.806															1309.42						9263.68						46.4425
193.204															1382.15						8165.32						20719.3
237.806															1603.36						7942.21						18659.5
201.204															1574.81						7723.65						20080.9
238.204															1482.51						14276.7						21776.6
215.806															2479.17						10368.3						25359.8
206.805															1315.52						7182.04						22838
204.204															1297.73						8614.5						34273.8
195.805															1112.18						6530.87						25403.6
193.204															1841.63						12031						29347.3
480.723															1329.75						11404						29205.4
215.204															1401.61						8694.2						8070.65
189.407															1376.03						3545.94						36763.5
152.805															1012.82						12065						33601.5
234.204															1182.41						8518.91						29208.3
298.264															1077.22						11445.6						638.967
213.204															1523.48						10671.7						24015.2
164.805															1251.02						4547.08						13037.3
375.05															1663.86						4592.91						26083.4
234.205															1239.76						2174.42						34634.1
215.204															74.4997						4416.7						33221.2
223.806															1090.25						7961.07						17391.2
272.806															1393.62						5107.27						27872.1
154.204															1401.45						16102.4						17806.3
288.92															1545.52						3967.99						26557.4
209.805															1278.26						10339.2						26541.9
224.806															1105.39						2572.5						19630.4
188.204															1177.21						7171.77						32276.1
131.805															1567.81						5413.25						22780
226.806															2139.85						11887.8						23026.1
236.806															1545.61						11205.2						20088.1
172.008															1438.93						9409.4						21902
258.806															1542.48						6808.88						31.2213
261.806															1279.02						5923.71						29840.7
199.806															1671.34						10507.1						25009.5
211.204															1254.88						8429.47						14696.2
242.204															1573.45						4519.63						18802.2
195.805															1376.32						8157.66						23853.9
260.806															1069.12						8274.65						24915.3
223.806															1150.69						10683.7						21854.7
254.405															1831.68						8979.84						29241
175.805															1549.72						11891.1						32086.6
251.806															1141.65						6727.51						21917
232.806															1684.47						9096.73						109.443
153.805															1259.11						7111.34						22847
226.407															1506.22						10053.1						18853.6
735.899															1641.36						2681.14						29498.3
111.203															1680.28						2922.27						23892.4
158.805															2681.27						4308.16						27762.8
167.008															1663.38						5855.01						14151.2
175.805															996.961						3248.01						32504.6
277.61															1203.86						3769.18						21212.7
174.805															1547.11						8112.75						39.2213
312.806															1288.28						9384.53						27665.1
159.204															1754.12						5500.34						15146.6
158.805															1609.78						6925.36						48680.6
208.805															1295.38						10138.9						23635.2
191.805															1460.29						10401.1						23949.4
227.806															1779.29						3306.82						29161.9
228.806															1604.36						3684.01						21937.1
146.805															2209.48						12998.3						13806.5
235.806															1223.35						4244.38						28501
207.806															1300.11						3235.83						35564.9
218.407															1292.19						9616.39						35598.9
197.805															1644.22						12539.8						23325.4
134.204															1614.32						13017.2						25448.7
258.963															1125.33						10564.3						20204.8
175.805															1271.8						10756						24881.3
251.204															1649.38						11836.6						15263.2
155.805															1238.85						9220.04						35418.3
188.805															1189.81						8938.78						35.2213
173.204															1366.21						6901.41						30459.3
183.805															2455.66						7312.52						21713.1
171.407															1603.55						7910.21						33.2213
146.805															1691.85						106.19						26192.1
148.204															1381.85						9526.91						97.4427
168.407															1175.08						4774.6						49302
379.565															1063.53						2816.74						23588.5
187.204															2522.27						8448.91						23114.6
128.407															1930.41						7321.63						4528
258.407															1407.48						11251.9						11525.9
145.805															1522.26						10021.3						28297.1
136.204															1237.43						3405.3						26112.1
126.008															1325.52						9011.31						27497.3
370.408															1554.06						12185						22637.3
211.407															1059.95						7049.17						15243.2
216.204															1340.49						4320.06						2688.3
212.008															1556.38						11003.2						29687.6
190.805															1662.84						6550.47						23229.8
218.806															770.874						10142.1						53.2214
178.805															2249.8						7564.19						33239
214.806															1094.5						6131.04						26023.9
243.806															1342.76						8800.81						13282.7
416.05															1679.34						10006.2						15547.3
254.204															1759.05						8517.72						18747.3
180.805															1659.15						3801.1						32722.8
173.805															362.587						10509.3						16351.7
165.008															1251.83						8687.11						35010.9
150.407															929.76						6219.88						120.885
183.805															1245.93						2784.74						15143.9
199.204															895.218						12489.1						57069.3
209.806															1231.89						8416.95						412.545
219.407															1105.38						6860.58						30480.6
220.407															1450.14						2666.93						27728.5
262.806															1738.58						6009.47						24037
290.92															1138.38						11886						16119.5
199.806															1649.21						2578.72						17341.7
205.806															2007.17						6507.56						19399.2
203.806															1135.92						11066.6						50.4425
193.407															1486.99						7745.73						27387.9
170.204															1483.51						6463.48						15663
198.008															1250.21						7497.19						14565.4
219.806															1570.02						8158.09						24305.6
272.806															1117.29						3154.79						23319
242.806															1462.23						9608.13						30656.8
207.805															1010.82						10404.6						24600.1
269.049															1365.06						10764.7						21267.6
173.008															1614.59						5165.1						25903.1
201.805															1191.72						7569.79						23755
143.805															1519.38						5265.26						26543
201.008															1058.12						7705.34						26326.7
270.407															1618.11						9697.29						47.4425
159.407															1472.26						8547.15						27982.7
196.407															1153.12						11670.9						21874.5
240.204															2722.33						7028.96						17084
244.806															1210.88						8324.64						29162.7
249.806															1464.62						6660.94						30025.2
292.205															1940.91						2759.61						30635.6
184.805															1828.74						7263.29						23006
194.806															1614.98						9596.04						23064.7
111.407															1322.56						3757.5						34133.3
201.805															1419.83						8833.7						20121.8
200.806															1507.35						7630.26						17725.6
422.65															383.801						3434.57						24875.8
161.805															1279.19						13560.5						27172.9
255.806															1273.59						8469.41						6261.44
157.204															1732.88						4761.5						64.4636
192.204															1296.98						3497.78						27025.3
153.407															1091.2						6427.83						17997.9
145.805															1337.36						8427.91						34543.3
150.407															1429.38						8355.39						21370.2
136.805															1549						7097.91						28723.4
190.204															1101.62						3155.46						23395.5
204.806															1259.82						3867.41						36871.5
179.61															1205.72						9591.69						25943.4
237.806															790.717						7266.17						27364.5
296.205															424.187						8480.82						6532.59
186.008															1294.65						3424.21						26383.6
259.806															1226.42						5246.82						29411.2
195.805															1013.15						11585.8						19057.6
274.806															1636.85						3027.09						25714.8
184.805															176.999						9585.1						12963
184.806															994.733						9820.8						22372.5
217.204															1486.76						9838.86						21484.3
394.807															1953.3						2965.98						27139.3
229.205															1757.01						9750.33						21449.9
252.806															1370.32						6803.84						24202.7
181.407															1485.72						14671						21926.1
208.806															1359.59						6973.57						28860.3
176.805															1347.58						10513.7						19447.5
176.008															1419.71						5054.63						25959.5
232.407															1288.19						7719.86						23397
233.806															1591.58						7998.46						26681.4
179.805															1160.63						7729.82						29289.7
137.805															1525.32						7903.92						43.6953
224.407															954.561						7383.25						24112.8
268.407															1260.99						1499.6						21359.9
242.806															1554.65						9584.04						23583.8
244.806															753.175						6169.76						28259.3
230.806															1292.85						5640.59						31173.6
219.806															1346.21						13193.6						21343
201.407															1334.46						6909.09						19919.5
206.204															538.702						6667.11						29047.4
203.806															1330.82						2535.53						53481.1
158.008															1899.45						13191.7						32085.4
232.806															1247.08						11460.5						30250
528.612															1487.85						1554.73						14629.9
151.204															1874.39						6102.37						7928.7
202.806															845.189						9078.13						17467.7
206.009															1177.08						9173.73						25424.4
154.805															1308.63						8479.16						26700.4
188.204															1337.82						8686.57						28691.3
189.805															1382.82						8621.37						24136.3
214.204															1050.35						9658.91						18841.4
63.4064															2139.85						13008.8						22101.9
181.407															2224.58						8418.17						43052.7
218.204															1474.25						8817.48						19664.1
232.204															1312.41						7976.81						27388.2
227.204															1163.55						14774.8						15021.1
203.204															1542.89						9072.63						13622.8
237.806															1546.09						8505.95						29992.9
229.806															1596.78						3913.05						30759.5
173.805															2066.41						5368.12						23408
144.805															1347.98						12002.3						22251.1
180.61															1133.26						7928.29						25602.2
186.805															1172.03						8317.88						23833.3
154.805															1580.61						10180.6						24300.3
211.806															1184.69						2463.98						26698.2
236.407															979.647						10331						73.4637
206.806															1337.02						9282.51						30309
287.205															1411.54						306.381						33928
203.204															1568.65						8021.36						24887
210.806															1966.61						9235.77						22944.5
232.204															1548.14						8518.03						20450.6
111.203															1328.26						6298.1						29331.5
161.805															1444.68						3551.08						23107.7
212.204															1083.2						559.068						30120
237.806															1287.35						12498.4						24007.9
202.805															1338.16						9964.07						33834.8
185.805															1032.86						8402.52						18562
262.92															965.719						8049.49						31212
148.204															1402.68						2124.43						19482.2
122.61															1717.75						8494.39						23023.6
197.805															1033.3						16012						26.4635
83.2033															1196.08						10924.7						12500.6
213.806															1372.23						9888.68						21207
213.204															1708.29						2127.2						25427.7
177.407															1439.94						6319.27						21642.6
270.205															1421.92						9225.02						27413.7
252.006															1741.22						6181.41						54.4636
261.009															1144.6						8133.88						24482
202.806															1536.83						8630.58						24736.9
171.805															1531.44						20325.8						45.4636
222.805															1751.92						8537.94						24093.1
193.204															1751.59						2113.57						23452.2
127.204															1933.87						10093.3						26897.5
248.407															1783.05						8686.57						21493.4
194.204															1819.27						4993.63						29025
188.204															1370.82						8554.11						22356.2
186.805															1421.84						3397.48						24853.8
254.806															2672.64						9349.67						18057
222.806															1343.62												25758.9
213.805															1157.96												16573.3
173.806															1954.08												21164.8
211.204															904.304												30854.1
197.805															1597.02												25254.5
206.407															1755.38												2736.15
119.805															1643.63												17204.4
141.602															420.544												25917.6
172.204															1313.15												25482.4
222.806															1575.11												26488.8
232.806															1084.2												24545.5
149.805															2444.14												27928.1
217.204															1358.62												20327.7
216.61															1809.34												18587.2
287.006															1670.21												26851.8
224.008															1829.67												33.2318
200.204															1813.08												24321.6
162.204															1396.59												26858.9
114.204															1386.51												20941.3
198.211															1726.45												25495.8
178.204															2493.16												22078.7
114.61															1550.46												28707
195.805															1284.35												23681.9
178.61															1571.89												19279.7
175.805															1777.47												24624.4
284.233															2186.54												17915.5
732.855															1216.81												58.4636
213.008															1050.03												22377.8
663.994															1377.66												30810.3
150.204															2028.64												31754.7
227.204															975.089												14406.1
162.204															1714.79												21600
424.35															1009.86												25230.8
184.407															1712.54												16893.9
224.204															1509.49												35690.9
210.806															1123.25												20944.7
221.204															1744.21												28073.3
174.008															1781.08												22011.9
210.806															1374.2												24751.8
202.008															1446.46												26401.1
211.806															1675.08												31349.2
254.806															1473.98												28522.1
120.805															1333.87												24951
179.008															1413.96												24820.1
202.008															1137.09												23509.6
192.805															1454.43												24455.3
198.204															1417.71												11920.6
166.407															1412.81												23804.9
591.41															1087.66												16299.1
162.407															1588.15												22569.8
199.204															1618.45												22610.1
273.92															1621.81												23187.3
230.009															1890.74												22465
390.78															1139.12												17483
207.407															807.332												255.696
151.805															1205.86												17590.7
217.806															1373.15												15932.9
262.806															1283.68												15011.9
322.307															2757.63												26815.4
184.407															1175.63												30329.4
239.806															1778.42												26109.2
275.806															1221.63												20834.2
245.806															1392.62												26654.6
1017															1873.21												26172.6
217.204															1280.99												19999.7
279.806															1985.7												20892.6
162.008															447.273												19584.4
197.204															1103.18												23489.9
184.806															1644.12												27760.8
146.602															1517.29												28960
205.806															1550.74												15351.2
217.407															1180.95												32809.7
240.806															1583.68												27700.6
263.205															1456.19												31120.8
168.204															1361.81												6595.79
150.805															1475.91												22493
256.205															1948.21												20419.8
203.805															1390.16												18841.5
202.204															1475.63												22003.5
237.813															1163.21												12113.1
266.407															1331.36												25431.2
176.407															1421.72												29018.7
359.264															2480.46												31211.1
212.61															1735.29												5720.07
168.805															1509.64												46.4636
195.204															1565.29												25360.2
253.407															1347.73												7122.02
191.805															1357.02												24172.8
301.006															2012.97												14687.9
226.806															38.4995												15367
168.805															1768.51												30879.8
233.407															1572.6												38.4636
219.204															1536.44												20684.2
203.008															1242.26												20792.1
199.204															1818.09												20267
316.221															1104.33												32006.2
259.806															2322.77												24619.4
189.61															1430.92												19278.7
235.806															1267.23												14944.5
149.407															1207.76												29056.9
324.178															1640.36												24968.6
192.204															1396.99												41.4636
241.806															1098.96												29342.1
175.407															1980.08												42.6953
259.806															1181.42												26019.4
204.204															1258.35												85.232
146.805															1460.59												26626
267.92															986.719												23255.7
247.806															1201.81												25815.9
195.407															1343.58												31616.1
250.806															311.173												20095.8
213.806															1928.58												18829.4
173.806															1185.2												23691.6
140.204															1020.9												30523.9
396.392															1461.68												24915.2
182.805															1810.04												22385.2
270.276															1799.14												25550.4
182.204															1175.46												24879.6
258.806															1656.99												33137.5
231.806															1036.72												15441.1
138.805															1552.72												32357
174.407															931.447												2090.36
176.204															1621.24												21556.4
145.204															1387.29												17694.1
211.204															1281.69												26169.1
230.806															1305.05												8752.48
153.407															1280.23												34003.7
297.533															1743.35												29125.2
273.319															1617.19												28657.2
227.806															1815.62												21683.3
162.805															1772.81												31199.5
149.407															1578.42												20743.5
147.407															82.4985												27072.1
164.204															1201.91												21153.6
234.362															1243.53												8173.53
153.805															1565.28												16254.4
485.738															1091.29												38297.4
244.204															1109.05												23214
212.806															1382.63												25401.8
241.204															1441.42												31561.9
205.204															1478.49												24145.5
259.009															1082.25												21813.5
297.049															1054.03												21239.8
238.806															1403.21												29671.3
177.805															1571.94												33.4636
196.008															1298.69												27445.3
222.204															1220.21												25438.4
162.407															1030.06												9317.01
139.805															1745.75												32908.4
245.407															1005.92												29674.9
242.806															1192.73												29265.6
208.806															1433.01												29025.8
201.805															1272.26												19613.3
201.805															1650.23												20401.8
167.805															1440.12												23832.5
252.806															1248.98												17159.3
291.178															1910.91												30513.9
208.204															1437.96												28796.7
200.008															1317.32												19155.5
177.805															1696.54												10767.3
177.407															1479.33												43.4636
232.61															1197.49												19332.4
198.806															1293.35												23958.6
219.205															1531.85												23617.3
252.806															1261.9												17748.8
188.407															1907.52												21962
217.806															1246.3												23331.1
395.009															1364.66												59334.4
226.806															1507.32												59334.4
223.204															1334.55												24307.3
199.806															1323.46												27295.9
260.204															1387.52												27811.5
255.205															1756.71												21461.6
212.407															1244.05												12876.4
180.204															1318.8												10956.4
137.407															1493.09												22489
227.806															1169.88												26536.8
224.806															1220.12												36102.4
229.806															1368.36												23895.5
233.806															1520.39												17009.8
642.896															1893.49												23147.7
167.204															1270.78												15943.8
211.806															1276.81												23513
246.204															1357.86												29395.3
202.806															1268.48												17640.4
117.203															1067.99												28541.3
211.204															1246.43												25886.4
249.806															1983.61												26431.9
213.806															1697.45												20702
237.835															1372.08												15734.8
161.204															1871.09												55.4636
253.806															1176.82												14203.3
187.805															1167.89												26193.6
187.61															1553.02												21264.7
188.805															1194.76												17595.6
204.204															1463.28												20797.9
229.806															3328.53												14171.3
205.204															2155.77												26241.3
210.204															1538.44												23360.8
113.602															1752.49												25673.1
189.407															1593.98												23109.4
233.204															1153.83												25562.5
222.806															1118.52												30190.1
285.806															1548.72												32839.8
217.407															1221.79												22033.2
234.806															1748.32												25266.9
258.806															1373.12												19212.4
227.806															1118.25												25693.8
128.204															1503.29												21414.6
208.805															1789.14												19178.1
555.124															1283.15												18597.7
164.61															1417.16												33115.4
199.806															1956.78												24589.2
154.805															1617.11												25687.5
190.805															1672.88												23021
153.805															1093.25												27516.6
136.008															1209.85												34529.1
111.805															1215.82												18793.9
230.806															1738.49												23593.5
195.805															1359.03												19555.2
242.806															2301.68												7678.63
146.805															2007.97												22337
192.204															1821.09												25414.4
249.806															1900.39												33061.4
182.407															1283.83												25494.9
197.805															996.004												25960.7
269.049															1633.45												32578.2
226.008															1588.34												12710.3
182.407															1238.02												21011.7
198.204															1327.36												29030.7
230.61															1374.21												19428.4
177.805															955.946												28161.4
160.805															1995.61												14101.4
178.204															1328.9												24575.5
146.204															837.446												20465.1
247.407															1746.74												55.4636
303.806															1327.6												43.4636
181.805															1512.05												17267.9
263.806															1366.08												19658.7
212.008															1497.09												21196.8
207.008															1557.55												15137.1
139.204															1578.81												22943.2
148.204															1423.25												25639.8
153.204															1356.85												32682.8
161.805															1050.3												21225.2
165.204															1148.59												34.4636
256.009															1444.05												18802.7
220.806															1049.13												14617.8
237.204															1174												19056.1
228.806															811.617												24937.7
307.806															1214.85												22142.6
169.008															1487.18												23437
298.963															1325.69												28394.3
266.806															1357.62												22196.1
148.805															1791.38												21439.6
188.204															1289.73												19247.6
190.806															1761.92												14518.5
214.407															1634.74												17713.4
546.594															1293.78												23995.8
205.805															1258.75												23989.3
157.211															1684.28												23567
222.806															1950.65												28795
167.805															1052.96												21749.2
139.805															969.675												31064
269.806															1539.41												21701.9
279.806															1189.4												27834
190.805															1234.68												24030.4
228.204															1146.51												24930.5
232.204															1634.36												19566.2
182.211															1087.13												25051.2
278.212															1017.58												28068.6
243.806															1378.16												23221.9
250.806															1494.59												28229.7
212.806															1044.95												24952.6
269.806															1507.26												18250.6
242.806															1432.6												23929.1
303.092															1574.15												16996.5
262.806															1434.92												27825.4
278.806															1187.09												27099.3
158.805															1124.88												15833.4
217.204															1768.92												25284.2
240.806															931.661												25516.2
237.407															1293.15												24866.9
150.204															955.533												21745
135.204															1364.75												18969.2
195.805															2735.99												21338.8
215.407															1139.7												21810.8
212.204															1137.16												13440.6
158.407															1434.88												35426.3
196.204															1277.33												38.4636
240.204															1263.31												15455.7
235.806															1600.82												27173.3
175.008															1713.24												31424.7
180.805															1859.91												31473.7
226.806															1440.14												22811.8
163.204															1295.36												30095.8
197.805															1654.28												24664.6
202.407															1233.76												29210
241.19															1232.21												22916.3
251.204															1036												30539.5
197.805															1588.82												15167
236.806															1372.38												17334
245.405															1406.03												529.652
286.009															1370.12												1271.81
195.407															1538.68												17646.2
137.805															1952.95												21227.8
195.805															1411.58												23604.4
533.822															1570.28												25303.1
148.204															1684.16												39291.5
93.2034															1622.24												25091.4
225.806															1343.6												31465.9
446.123															1273.82												14851.4
160.204															1285.29												20537.2
146.204															1898.68												24405.2
212.806															1130.75												56.4636
206.805															1354.62												14374.6
219.204															1548.02												29286.2
224.407															1818.67												23491.7
284.135															2001.54												17696.7
183.204															2655.11												51.4636
74.6018															1331.58												20394.6
272.006															1566.75												25721.8
267.806															1622.66												25304.8
343.178															1305.56												16643.7
239.806															1165.7												22864.4
264.407															165.999												13138
207.61															1566.69												18688.4
177.407															917.947												31416.5
153.805															1496.1												16586.3
189.204															212.686												21382.2
183.805															2295.37												20589.8
197.806															1655.03												21357.9
189.008															1543.04												26872.2
211.407															1404.02												27252.5
237.806															1449.61												24747
251.806															1682.21												23670.7
198.806															1356.36												27621.1
261.806															1090.22												31197.7
152.204															1640.18												26901.6
201.805															1895.52												25541.4
267.806															1306.16												26804.1
157.407															1169.79												24711.9
170.407															434.687												22602.5
419.478															1100.53												20465.2
258.806															1591.82												16079.5
302.408															938.903												12685.4
239.806															1502.05												28680.1
208.806															1169.41												18749.8
207.407															1147.96												34775.9
193.805															1546.92												26764.6
277.806															1177.51												16158.1
208.407															1576.94												22578.4
201.407															1919.49												27797.5
137.805															1826.84												20096.8
195.805															1837.24												26769
171.204															1273.02												36852.5
222.806															114.5												26715.4
234.806															1571.52												30163
513.964															1724.71												30206.7
193.806															1307.82												15998
164.204															1116.42												22830.5
249.806															1221.85												29519.9
209.805															1651.69												30294
241.204															2257.67												30333.9
249.212															1304.33												29493.1
200.805															1548.55												25325.1
373.049															1245.91												26417.2
100.203															1733.67												11894.8
230.806															1645.19												20121.6
224.407															1255.48												39474.1
259.877															1203.76												23382.2
198.008															1290.21												22579.2
744.852															1482.42												23329.6
132.805															2057.87												23039.7
176.805															1268.08												20876.4
275.407															1635.81												29647.9
114.008															1398.86												31619.8
183.407															549.874												24508.4
236.806															1413.25												19733.4
231.204															1634.66												41.2318
148.407															1297.02												24477.2
314.178															756.734												20685.2
253.806															1072.49												24226.8
219.204															1465.52												21683.6
															1176.67												27377.9
															1042.97												27161.2
															1430.9												21927.3
															1287.14												19284.2
															1430.87												10216.3
															1571.59												23339.5
															3350.9												24089.8
															523.704												18206
															1294.22												28063.1
															1666.1												27651.9
															1388.82												24673.9
															1466.42												27378.7
															1409.86												22142.4
															958.156												23533.7
															1576.2												28588.1
															1372.73												22840.3
															1577.31												20644.6
															1572.47												25437.2
															1482.65												15186.9
															1282.02												21890.8
															1158.92												19224.5
															1795.33												28190.6
															1555.9												10927.3
															613.362												36.2318
															948.385												21147.7
															2285.07												19591.2
															1118.67												17407.7
															1215.83												25189.2
															1364.91												16909.9
															1802.93												26143
															1582.55												19947.3
															1191.32												17790.6
															1857.54												27039.1
															1610.2												21221.2
															1661.94												33252.9
															1734.53												13018.2
															1726.76												31577.9
															1941.53												23571
															1633.11												21438.9
															1598.11												23819.2
															1410.73												20774.3
															1717.67												38861.9
															1583.3												22340.3
															1164.92												17390.6
															1360.56												18268
															1235.49												27616.3
															1764.46												15506.2
															1299.13												39.4636
															1459.86												27526.2
															1472.3												28601.4
															1530.12												17208.8
															1514.23												23766.4
															1213.74												28677
															1129.1												23353.6
															1159.71												19308
															1076.5												14280.1
															1538.64
															1635.28
															1494.6
															1505.66
															1857.06
															2220.11
															1372.75
															2689.2
															1523.08
															1365
															1072.71
															1564.64
															1344.93
															1579.67
															1724.93
															1104.37
															1734.58
															1357.64
															1454.57
															1886.88
															1874.27
															1398.86
															1359.6
															1607.11
															1713.54
															1830.76
															1904.14
															1824.98
															1380.04
															1970.61
															1385.04
															1697.11
															831.856
															1116.27
															1152.53
															1024.56
															1327.2
															1241.59
															1402.86
															1110.93
															1135.41
															1261.37
															1177.58
															1244.66
															1087.14
															1080.41
															1091.55
															1567.81
															1781.11
															1978
															1910.66
															1454.55
															529.318
															1756.16
															1940.74
															1626.25
															1587.8
															1501.3
															1767.88
															1762.7
															1423.96
															1449.21
															2758.81
															1502.3
															1223.22
															1320.43
															1358.61
															1558.46
															1314.1
															1464.12
															1101.32
															1670.68
															1041.93
															1321.14
															1711.76
															3078.5
															1811.62
															1722.75
															1721.54
															1074.43
															1142.44
															1292.26
															1899.97
															1762.7
															1396.73
															1622.07
															1450.57
															1038.46
															1273.17
															1286.57
															1449.69
															1771.97
															1392.95
															1737.49
															911.549
															1862.53
															1415.82
															1110.54
															1422.12
															1555.6
															1587.44
															1502.35
															1446.34
															1486.9
															1611.02
															865.034
															1081.01
															1110.72
															1254.05
															947.328
															1482.73
															1327.26
															1388.78
															1075.01
															1319.23
															1444.14
															1197.97
															1353.52
															1328.47
															1450.77
															1079.11
															2001.61
															1205.8
															1123.4
															1176.62
															1345.47
															2064.04
															1487.6
															1379.95
															1743.4
															1129.84
															1057.02
															901.156
															1154.79
															1563.72
															1198.09
															1595.35
															1505.72
															1957.78
															1531.72
															1429.03
															1509.25
															132.48
															1879.66
															1722.67
															1153.84
															1298.57
															219.959
															1283.85
															1685.23
															1646.28
															1112.67
															1607.94
															1366.47
															1760.75
															1072.54
															2560.52
															1115.41
															644.49
															1383.64
															1176.53
															1284.22
															1321.34
															2080.46
															1321.65
															1247
															1049.41
															1140.54
															1513.12
															1535.65
															1484.25
															1306.17
															1217.37
															1365.52
															1208.8
															1283.57
															1515.34
															1335.49
															1683.45
															1397.58
															1767
															1364.65
															1008.8
															1435.7
															1656.37
															1484.82
															788.391
															1468.12
															1577.64
															1526.02
															1788.75
															1474.07
															2476.62
															1319.3
															1177.01
															1589.46
															1718.58
															1600.07
															974.071
															1278.44
															2971.72
															1298.22
															1138.67
															1264
															1265.49
															1274.11
															1342.39
															1490.25
															1759.01
															2370.84
															1187.49
															281.959
															1349.56
															677.748
															1265.71
															1408.17
															1250.04
															1145.67
															1201.74
															1241.92
															2503.09
															1292.93
															1419.61
															1247.02
															1023.29
															2047.81
															2070.08
															1111.72
															1489.42
															1426.56
															2413.62
															1493.61
															1532.51
															1259.36
															1513.51
															825.12
															1517.72
															1646.73
															1950.61
															1088.03
															1658.03
															1283.71
															1020.77
															1323.92
															1244.58
															1847.44
															1501.16
															1107.59
															1902.43
															1225.79
															1209.83
															1345.69
															1131.36
															1221.19
															1028.32
															1518.68
															1449.05
															921.942
															1640.41
															914.285
															1477.64
															1135.76
															935.371
															1340.44
															1180.19
															1304.27
															1453.03
															1101.15
															1228.97
															1139.23
															1877.84
															1147.99
															1491.12
															1226.66
															1987.47
															1372.53
															1968.49
															1392.04
															1602.08
															1420.83
															1556.5
															1701.06
															1661.41
															1626.8
															1884.48
															1359.97
															1628.33
															5744.51
															3260.96
															1648.85
															1396.34
															1267.92
															1036.11
															1601.43
															1380.75
															1855.62
															1534.8
															1206.83
															1281.57
															1412.12
															1530.51
															2173.46
															1273.78
															1585.51
															1450.9
															1204.62
															1058.59
															1414.52
															1328.74
															1462.65
															1649.68
															1728.31
															1918.48
															1531.55
															1614.97
															1780.88
															1783.88
															1466.49
															1435.38
															1244.89
															1132.01
															1531.56
															1699.41
															1351.56
															1195.93
															1009.76
															661.576
															1130.41
															1424.95
															1139.37
															1219.27
															1791.75
															1800.79
															1539.42
															1638.37
															1506.78
															1485.95
															1464.38
															1201.18
															982.071
															3521.62
															137.48
															1263.14
															1168.49
															1455.35
															1385.47
															1107.24
															1090.49
															1207.1
															1263.93
															1550.02
															1657.45
															1213.18
															726.862
															1586.94
															1260.31
															1356.5
															1727.38
															1793.53
															1626.24
															2201.33
															1260.14
															2273.21
															1306.78
															1363.4
															897.342
															1314.34
															709.919
															1247.54
															1902.58
															1334.57
															1823.85
															1360.43
															1202.79
															972.592
															1106.27
															2021.91
															1278.72
															1278.84
															1614.15
															1551.6
															1620.9
															1522.35
															1637.03
															994.764
															1495.51
															1805.53
															1103.27
															1775.85
															1589.68
															1439.05
															1423.86
															1120.96
															1237.7
															2169.24
															1367.35
															1175.45
															749.434
															1478.51
															1666.55
															619.226
															1418.61
															1575.33
															1070.01
															1649.85
															1020.71
															1669.24
															1161.58
															1785.4
															1567.5
															965.5
															1365.4
															1869.48
															190.48
															1748.64
															1177.79
															951.457
															867.421
															1830.84
															1655.5
															1277.04
															1415.12
															2012.48
															1363.78
															1254.31
															1355.52
															1169.5
															1199.92
															1357
															1736.67
															1290.23
															1072.41
[truncated: 221 more rows]

## Sheet: Au NP analog and pulse
Au particles			Detector	Sensitivity	Particle size (nm)	Particle mass (fg)	# detected particles	Avg. int. (counts)	Avg. int. (counts/s)	Meas. Time (min)	Notes						Detector	Sensitivity	Particle size (nm)	Particle mass (fg)	# detected particles	Avg. int. (counts)	Avg. int. (counts/s)	Meas. Time (s)
Data location			Analog	Normal	60	2.18271	654.25	129.722	1.29722e+06	0.5							Pulse	Normal	60	2.18271	584.333	129.779	1.29779e+06	0.5
C:\Users\lomax-vogt.2\The Ohio State University\Nanoparticles NSF - General\Engineered NP measurements\Engineered Au NPs\2023 12 18 Au NPs reduced normal pulse analog\2023 12 18			Analog	Normal	80	5.17384	647	339.137	3.39137e+06	0.5							Pulse	Normal	80	5.17384	631.333	260.609	2.60609e+06	0.5	Different between pulse and analog
			Analog	Normal	150	34.1049	655.333	2654.62	2.65462e+07	0.5							Pulse	Normal	150	34.1049	645	2478.75	2.47875e+07	0.5
Conditions			Analog	Normal	200	80.8413	336.667	6233.05	6.23305e+07	0.5							Pulse	Normal	200	80.8413	327.333	134.162	1.34162e+06	0.5
Uptake rate (mL/min)	0.062		Analog	Normal	500	1263.14	58.3333	1.33793e+08	1.33793e+12	0.5	Data from standard is unreliable, standard does not seem to have 500 nm Au particles						Pulse	Normal	500	1263.14	67.6667	147.47	1.4747e+06	0.5	Data from standard is unreliable, standard does not seem to have 500 nm Au particles
NP susp. conc. (NP/mL)	100000
			Detector	Sensitivity	Particle size (nm)	Particle mass (fg)	# detected particles	Avg. int. (counts)	Avg. int. (counts/s)	Meas. Time (min)							Detector	Sensitivity	Particle size (nm)	Particle mass (fg)	# detected particles	Avg. int. (counts)	Avg. int. (counts/s)	Meas. Time (s)
			Analog	Reduced	60	2.18271	71	17.5408	175408	0.5	Too close to threshold						Pulse	Reduced	60	2.18271	61	17.264	172640	0.5
			Analog	Reduced	80	5.17384	446.667	28.096	280960	0.5	Too close to threshold						Pulse	Reduced	80	5.17384	480.333	27.8666	278666	0.5
			Analog	Reduced	150	34.1049	618.333	186.564	1.86564e+06	0.5							Pulse	Reduced	150	34.1049	567.333	188.469	1.88469e+06	0.5
			Analog	Reduced	200	80.8413	272.333	496.307	4.96307e+06	0.5							Pulse	Reduced	200	80.8413	315	239.273	2.39273e+06	0.5
			Analog	Reduced	1000	10105.2	264.889	24125	2.4125e+08	1.66667							Pulse	Reduced	500	1263.14	49.6667	96.8694	968694	0.5	Data from standard is unreliable, standard does not seem to have 500 nm Au particles
			Analog	Reduced	1500	34104.9	241.556	53490.5	5.34905e+08	1.66667
			Analog	Reduced	500	1263.14	75.3333	9466.32	9.46632e+07	0.5	Data from standard is unreliable, standard does not seem to have 500 nm Au particles

## Sheet: TE of Au NP
2022-11-08			2023-12-19				2022-11-08	2023-12-19
Intensity (counts)	# particles		60 nm Au NP intensity (counts)			Transport efficiency	0.154244	0.216129
1	0		144.941			# particles	4261	670
2	0		189.941			Uptake rate	0.065	0.062
3	0		128.867			Measurement time	1.7	0.5
4	0		142.941			#/mL in stock	250000	100000
5	0		197.941
6	0		167.882
7	0		134.941			Stock supplier	Nancomposix, 60 nm citrate coated	Nancomposix, 60 nm citrate coated
8	0		182.926
9	0		157.941
10	0		203.941
11	0		102.926
12	0		100.956
13	1		149.911
14	0		167.941
15	1		148.956
16	0		65.9407
17	0		189.926
18	1		129.911
19	0		141.926
20	0		118.956
21	0		175.941
22	0		79.8814
23	1		122.926
24	0		68.9407
25	0		53.9555
26	1		67.9704
27	0		134.926
28	1		204.941
29	0		77.9259
30	1		129.956
31	1		140.941
32	0		92.8665
33	0		61.9407
34	1		146.956
35	0		128.822
36	0		150.941
37	0		124.941
38	0		105.941
39	1		208.941
40	0		161.911
41	0		140.896
42	0		123.852
43	1		77.9259
44	0		153.941
45	0		198.941
46	0		101.926
47	0		214.926
48	0		137.941
49	0		30.9555
50	0		132.911
51	1		261.837
52	0		216.941
53	0		93.9408
54	1		133.941
55	0		206.956
56	0		116.956
57	0		192.926
58	0		163.956
59	1		119.956
60	0		209.956
61	0		116.956
62	0		321.748
63	0		141.926
64	0		154.941
65	0		153.941
66	0		133.867
67	0		157.926
68	1		204.956
69	0		210.941
70	0		93.8665
71	1		145.956
72	0		88.9408
73	1		149.941
74	0		127.926
75	3		161.941
76	0		105.941
77	2		175.941
78	1		123.956
79	0		59.9407
80	2		117.926
81	0		117.941
82	2		131.926
83	0		144.911
84	2		164.941
85	2		120.911
86	2		88.9556
87	2		139.956
88	1		115.926
89	2		114.941
90	3		98.9259
91	2		137.926
92	3		124.941
93	1		158.941
94	3		117.941
95	2		89.9259
96	4		223.941
97	3		174.852
98	3		138.941
99	4		120.881
100	6		136.956
101	4		86.9556
102	6		147.881
103	2		186.926
104	5		164.896
105	6		106.941
106	10		141.926
107	7		148.926
108	9		85.8814
109	6		164.882
110	7		123.881
111	12		96.9705
112	11		69.9556
113	14		135.941
114	10		149.941
115	6		93.8962
116	16		186.941
117	7		112.956
118	16		177.926
119	15		90.9259
120	22		77.9556
121	15		120.926
122	18		89.9111
123	15		111.941
124	14		75.9259
125	19		119.941
126	15		121.941
127	15		184.852
128	17		92.9556
129	29		154.941
130	23		112.926
131	23		130.926
132	25		193.941
133	24		49.9258
134	32		179.941
135	26		177.956
136	30		106.941
137	29		95.9259
138	28		83.8962
139	32		163.911
140	25		94.9259
141	28		97.9556
142	25		80.8814
143	47		158.941
144	23		121.911
145	41		75.9556
146	40		79.9556
147	22		72.9407
148	41		147.911
149	40		125.896
150	43		104.926
151	38		137.896
152	43		81.9407
153	43		60.8813
154	42		113.941
155	42		170.911
156	38		108.941
157	46		210.941
158	32		163.941
159	27		81.9259
160	26		98.9556
161	36		98.9259
162	35		92.9111
163	36		163.926
164	41		139.941
165	35		177.896
166	39		130.941
167	43		105.941
168	57		209.956
169	43		82.9259
170	36		122.941
171	34		87.9408
172	37		140.926
173	44		111.926
174	43		74.8962
175	44		73.9259
176	51		134.941
177	44		94.9556
178	37		110.941
179	44		135.911
180	40		73.9407
181	42		169.941
182	22		138.941
183	48		172.926
184	33		159.941
185	41		62.9556
186	35		87.8814
187	38		185.926
188	38		156.926
189	43		132.926
190	40		109.941
191	33		131.881
192	32		129.926
193	28		145.941
194	29		122.926
195	33		117.896
196	38		98.9408
197	31		113.956
198	36		160.926
199	24		87.9408
200	32		80.9259
201	29		146.926
202	23		173.926
203	29		106.911
204	21		99.9259
205	32		100.911
206	36		221.926
207	26		120.911
208	36		127.941
209	29		126.941
210	30		168.941
211	23		195.941
212	21		95.9408
213	16		87.9259
214	31		104.956
215	25		92.9556
216	17		75.9407
217	21		162.896
218	20		165.956
219	23		206.956
220	19		148.926
221	21		104.941
222	19		43.9704
223	12		89.9259
224	14		224.957
225	12		146.941
226	14		115.941
227	15		55.9259
228	14		224.956
229	19		113.941
230	16		108.896
231	12		112.941
232	14		190.926
233	12		82.9556
234	19		131.867
235	14		107.881
236	11		159.941
237	22		196.941
238	14		153.926
239	6		134.941
240	15		105.941
241	8		161.867
242	7		81.8962
243	13		171.926
244	17		164.941
245	16		187.941
246	15		106.941
247	10		160.941
248	8		82.8962
249	9		139.941
250	7		134.911
251	9		91.9557
252	6		69.911
253	5		186.941
254	8		157.956
255	8		84.9556
256	11		162.941
257	6		184.941
258	8		308.927
259	7		206.926
260	12		153.941
261	6		175.956
262	6		168.941
263	3		75.9407
264	4		168.926
265	12		177.956
266	7		155.941
267	16		196.926
268	7		149.911
269	9		140.956
270	3		72.9556
271	2		177.941
272	3		137.941
273	7		63.8962
274	3		180.941
275	7		173.956
276	5		182.941
277	5		83.9556
278	3		120.971
279	2		100.941
280	4		138.881
281	3		197.956
282	5		170.956
283	2		100.926
284	2		95.9259
285	3		90.9408
286	2		98.9111
287	5		94.9556
288	2		124.896
289	4		136.941
290	5		197.911
291	3		210.926
292	3		162.941
293	3		62.9259
294	4		145.896
295	3		59.9259
296	3		150.911
297	2		129.941
298	0		101.911
299	3		128.926
300	0		70.8665
301	2		124.956
302	1		182.941
303	1		527.118
304	4		99.9556
305	4		139.941
306	1		185.956
307	1		97.9259
308	0		108.911
309	2		137.881
310	0		166.896
311	2		187.926
312	0		158.926
313	0		167.941
314	2		147.941
315	1		149.956
316	3		131.926
317	2		85.9556
318	2		141.837
319	4		173.926
320	4		162.896
321	3		67.9259
322	1		90.9111
323	0		54.911
324	3		106.896
325	1		177.941
326	2		82.9407
327	3		128.926
328	1		125.881
329	1		84.9407
330	1		119.956
331	4		75.8962
332	0		112.956
333	0		152.926
334	1		159.896
335	2		141.941
336	0		153.956
337	2		98.9408
338	0		98.9408
339	0		95.9408
340	3		87.9408
341	0		95.9111
342	2		127.941
343	0		158.941
344	1		119.941
345	1		109.926
346	1		65.911
347	3		175.941
348	1		129.941
349	2		188.956
350	0		110.911
351	0		109.956
352	0		105.956
353	1		244.927
354	1		175.926
355	0		109.956
356	0		66.9407
357	1		72.911
358	1		160.926
359	1		197.941
360	1		124.926
361	0		199.941
362	2		158.926
363	0		97.9111
364	0		156.911
365	2		74.9407
366	1		141.941
367	0		66.9556
368	0		226.926
369	1		214.926
370	1		123.941
371	1		195.882
372	1		164.926
373	0		135.956
374	0		98.9556
375	2		87.9408
376	2		142.956
377	1		143.926
378	0		109.941
379	0		112.926
380	0		70.9407
381	0		62.9259
382	1		161.941
383	0		109.911
384	0		121.926
385	2		102.956
386	2		177.941
387	0		119.926
388	1		101.896
389	1		155.956
390	1		145.941
391	0		137.941
392	0		336.957
393	2		81.9408
394	0		161.896
395	1		76.911
396	0		124.956
397	0		121.941
398	2		117.956
399	0		101.926
400	1		208.941
401	0		158.911
402	0		152.956
403	0		82.9408
404	3		167.926
405	1		103.896
406	0		55.9259
407	2		97.9408
408	0		117.926
409	0		158.926
410	0		119.941
411	0		191.956
412	0		158.881
413	1		169.941
414	0		110.941
415	0		134.941
416	0		109.971
417	1		151.837
418	0		192.971
419	0		170.926
420	0		167.941
421	1		219.956
422	0		170.941
423	2		114.941
424	0		121.956
425	1		89.9259
426	0		172.896
427	0		63.8814
428	0		145.941
429	1		202.926
430	0		89.9407
431	0		100.971
432	0		179.852
433	2		188.882
434	0		95.9259
435	0		120.911
436	0		209.926
437	0		127.956
438	0		84.8962
439	0		119.926
440	0		84.9408
441	0		86.9407
442	2		154.926
443	0		145.956
444	0		142.941
445	0		195.926
446	0		206.941
447	0		124.896
448	0		87.9259
449	0		126.941
450	1		179.941
451	0		156.956
452	0		133.926
453	0		146.956
454	0		231.941
455	0		97.9408
456	0		165.867
457	0		251.941
458	1		151.926
459	0		71.9407
460	0		109.926
461	0		66.8962
462	0		258.957
463	0		97.8814
464	0		271.793
465	0		186.911
466	0		148.941
467	0		115.956
468	0		185.941
469	0		81.9259
470	0		127.926
471	0		148.956
472	1		88.9407
473	0		162.956
474	1		146.911
475	0		92.9408
476	0		156.941
477	0		78.9407
478	0		195.956
479	0		199.896
480	0		232.911
481	0		142.896
482	1		154.926
483	0		123.941
484	1		168.926
485	0		190.926
486	0		164.926
487	0		199.956
488	0		127.941
489	0		68.9407
490	0		145.911
491	0		99.9706
492	0		126.881
493	0		123.896
494	1		110.926
495	0		159.896
496	0		98.9259
497	0		118.941
498	0		152.926
499	1		93.9556
500	0		133.941
501	0		113.941
502	0		192.956
503	0		86.9407
504	0		152.926
505	2		267.942
506	0		103.941
507	0		200.941
508	0		99.9259
509	0		85.9259
510	0		166.941
511	0		212.896
512	0		115.926
513	0		16.9555
514	0		242.912
515	0		221.941
516	0		179.941
517	0		182.956
518	0		156.941
519	0		174.956
520	0		162.926
521	0		223.941
522	0		131.941
523	0		184.956
524	0		154.852
525	0		119.926
526	0		279.897
527	0		146.926
528	0		118.941
529	0		94.9259
530	0		81.9259
531	0		116.956
532	0		151.941
533	0		128.941
534	0		97.9408
535	0		201.911
536	0		240.942
537	0		99.9408
538	0		178.941
539	0		82.9259
540	0		137.896
541	0		106.926
542	0		284.897
543	0		172.941
544	0		90.9556
545	0		147.911
546	0		183.941
547	0		119.911
548	0		169.911
549	0		140.956
550	0		124.926
551	0		154.941
552	0		153.956
553	0		135.926
554	0		213.912
555	0		94.9408
556	0		254.942
557	0		76.9556
558	0		164.896
559	0		92.9556
560	0		121.926
561	0		92.9408
562	0		98.9259
563	0		198.926
564	0		146.926
565	0		89.9259
566	0		151.881
567	0		71.9556
568	0		111.956
569	0		98.9408
570	0		230.867
571	0		135.956
572	0		97.9556
573	0		164.896
574	0		180.941
575	0		138.956
576	0		187.882
577	0		133.926
578	0		133.956
579	1		174.941
580	0		131.956
581	0		109.941
582	0		120.941
583	0		104.926
584	0		162.941
585	0		81.9556
586	0		126.941
587	0		104.911
588	0		141.956
589	0		122.941
590	0		139.911
591	0		187.911
592	0		151.941
593	0		86.9408
594	0		88.9556
595	0		16.9555
596	0		94.9259
597	0		211.941
598	0		112.926
599	0		150.926
600	0		170.911
601	0		159.896
602	0		149.941
603	0		104.956
604	0		100.911
605	0		229.926
606	0		174.941
607	0		126.941
608	0		130.956
609	0		118.941
610	0		157.926
611	0		153.926
612	0		162.956
613	0		127.926
614	0		154.881
615	0		73.8962
616	0		168.956
617	0		147.926
618	0		80.8962
619	0		110.941
620	0		144.911
621	0		149.896
622	0		86.9111
623	0		121.941
624	0		114.926
625	0		118.926
626	0		183.941
627	0		96.9557
628	0		115.941
629	0		112.926
630	0		166.941
631	0		154.911
632	0		134.941
633	0		104.852
634	0		156.941
635	0		138.941
636	0		121.926
637	0		242.927
638	0		198.926
639	0		189.911
640	0		105.956
641	0		116.911
642	0		132.941
643	0		73.9556
644	0		135.941
645	0		81.9259
646	0		139.926
647	0		123.941
648	0		95.9111
649	0		103.941
650	0		82.9556
651	0		131.941
652	0		172.941
653	0		193.941
654	0		163.956
655	0		138.941
656	0		79.9407
657	0		138.926
658	0		213.941
659	0		87.9259
660	0		99.8962
661	0		113.941
662	0		117.911
663	0		107.881
664	0		150.941
665	0		130.941
666	0		110.896
667	0		194.956
668	0		93.9408
669	0		153.926
670	0		101.941
671	0
672	0
673	0
674	0
675	0
676	0
677	1
678	0
679	0
680	0
681	0
682	0
683	0
684	0
685	0
686	0
687	0
688	0
689	0
690	0
691	0
692	0
693	0
694	0
695	0
696	0
697	0
698	0
699	0
700	0
701	0
702	0
703	0
704	0
705	0
706	0
707	0
708	0
709	0
710	0
711	0
712	0
713	0
714	0
715	0
716	0
717	0
718	0
719	0
720	0
721	0
722	0
723	0
724	0
725	0
726	0
727	0
728	0
729	0
730	0
731	0
732	0
733	0
734	0
735	0
736	0
737	0
738	0
739	0
740	0
741	0
742	0
743	0
744	0
745	1
746	0
747	0
748	0
749	0
750	0
751	0
752	0
753	0
754	0
755	0
756	0
757	0
758	0
759	0
760	0
761	0
762	0
763	0
764	0
765	0
766	0
767	0
768	0
769	0
770	0
771	0
772	0
773	0
774	0
775	0
776	0
777	0
778	0
779	0
780	0
781	0
782	0
783	0
784	0
785	0
786	0
787	0
788	0
789	0
790	0
791	0
792	0
793	0
794	0
795	0
796	0
797	0
798	0
799	0
800	0
801	0
802	0
803	0
804	0
805	0
806	0
807	0
808	0
809	0
810	0
811	0
812	0
813	0
814	0
815	0
816	0
817	0
818	0
819	0
820	0
821	0
822	0
823	0
824	0
825	0
826	0
827	0
828	0
829	0
830	0
831	0
832	0
833	0
834	0
835	0
836	0
837	0
838	0
839	0
840	0
841	0
842	0
843	0
844	0
845	0
846	0
847	0
848	0
849	0
850	0
851	0
852	0
853	0
854	0
855	0
856	0
857	0
858	0
859	0
860	0
861	0
862	0
863	0
864	0
865	0
866	0
867	0
868	0
869	0
870	0
871	0
872	0
873	0
874	0
875	0
876	0
877	0
878	0
879	0
880	0
881	0
882	0
883	0
884	0
885	0
886	0
887	0
888	0
889	0
890	0
891	0
892	0
893	0
894	0
895	0
896	0
897	0
898	0
899	0
900	0
901	0
902	0
903	0
904	0
905	0
906	0
907	0
908	0
909	0
910	0
911	0
912	0
913	0
914	0
915	0
916	0
917	0
918	0
919	0
920	0
921	0
922	0
923	0
924	0
925	0
926	0
927	0
928	0
929	0
930	0
931	0
932	0
933	0
934	0
935	0
936	0
937	0
938	0
939	0
940	0
941	0
942	0
943	0
944	0
945	0
946	0
947	0
948	0
949	0
950	0
951	0
952	0
953	0
954	0
955	0
956	0
957	0
958	0
959	0
960	0
961	0
962	0
963	0
964	0
965	0
966	0
967	0
968	0
969	0
970	0
971	0
972	0
973	0
974	0
975	0
976	0
977	0
978	0
979	0
980	0
981	0
982	0
983	0
984	0
985	0
986	0
987	0
988	0
989	0
990	0
991	0
992	0
993	0
994	0
995	0
996	0
997	0
998	0
999	0
1000	0
1001	0
1002	0
1003	0
1004	0
1005	0
1006	0
1007	0
1008	0
1009	0
1010	0
1011	0
1012	0
1013	0
1014	0
1015	0
1016	0
1017	0
1018	0
1019	0
1020	0
1021	0
1022	0
1023	0
1024	0
1025	0
1026	0
1027	0
1028	0
1029	0
1030	0
1031	0
1032	0
1033	0
1034	0
1035	0
1036	0
1037	0
1038	0
1039	0
1040	0
1041	0
1042	0
1043	0
1044	0
1045	0
1046	0
1047	0
1048	0
1049	0
1050	0
1051	0
1052	0
1053	0
1054	0
1055	0
1056	0
1057	0
1058	0
1059	0
1060	0
1061	0
1062	0
1063	0
1064	0
1065	0
1066	0
1067	0
1068	0
1069	0
1070	0
1071	0
1072	0
1073	0
1074	0
1075	0
1076	0
1077	0
1078	0
1079	0
1080	0
1081	0
1082	0
1083	0
1084	0
1085	0
1086	0
1087	0
1088	0
1089	0
1090	0
1091	0
1092	0
1093	0
1094	0
1095	0
1096	0
1097	0
1098	0
1099	0
1100	0
1101	0
1102	0
1103	0
1104	0
1105	0
1106	0
1107	0
1108	0
1109	0
1110	0
1111	0
1112	0
1113	0
1114	0
1115	0
1116	0
1117	0
1118	0
1119	0
1120	0
1121	0
1122	0
1123	0
1124	0
1125	0
1126	0
1127	0
1128	0
1129	0
1130	0
1131	0
1132	0
1133	0
1134	0
1135	0
1136	0
1137	0
1138	0
1139	0
1140	0
1141	0
1142	0
1143	0
1144	0
1145	0
1146	0
1147	0
1148	0
1149	0
1150	0
1151	0
1152	0
1153	0
1154	0
1155	0
1156	0
1157	0
1158	0
1159	0
1160	0
1161	0
1162	0
1163	0
1164	0
1165	0
1166	0
1167	0
1168	0
1169	0
1170	0
1171	0
1172	0
1173	0
1174	0
1175	0
1176	0
1177	0
1178	0
1179	0
1180	0
1181	0
1182	0
1183	0
1184	0
1185	0
1186	0
1187	0
1188	0
1189	0
1190	0
1191	0
1192	0
1193	0
1194	0
1195	0
1196	0
1197	0
1198	0
1199	0
1200	0
1201	0
1202	0
1203	0
1204	0
1205	0
1206	0
1207	0
1208	0
1209	0
1210	0
1211	0
1212	0
1213	0
1214	0
1215	0
1216	0
1217	0
1218	0
1219	0
1220	0
1221	0
1222	0
1223	0
1224	0
1225	0
1226	0
1227	0
1228	0
1229	0
1230	0
1231	0
1232	0
1233	0
1234	0
1235	0
1236	0
1237	0
1238	0
1239	0
1240	0
1241	0
1242	0
1243	0
1244	0
1245	0
1246	0
1247	0
1248	0
1249	0
1250	0
1251	0
1252	0
1253	0
1254	0
1255	0
1256	0
1257	0
1258	0
1259	0
1260	0
1261	0
1262	0
1263	0
1264	0
1265	0
1266	0
1267	0
1268	0
1269	0
1270	0
1271	0
1272	0
1273	0
1274	0
1275	0
1276	0
1277	0
1278	0
1279	0
1280	0
1281	0
1282	0
1283	0
1284	0
1285	0
1286	0
1287	0
1288	0
1289	0
1290	0
1291	0
1292	0
1293	0
1294	0
1295	0
1296	0
1297	0
1298	0
1299	0
1300	0
1301	0
1302	0
1303	0
1304	0
1305	0
1306	0
1307	0
1308	0
1309	0
1310	0
1311	0
1312	0
1313	0
1314	0
1315	0
1316	0
1317	0
1318	0
1319	0
1320	0
1321	0
1322	0
1323	0
1324	0
1325	0
1326	0
1327	0
1328	0
1329	0
1330	0
1331	0
1332	0
1333	0
1334	0
1335	0
1336	0
1337	0
1338	0
1339	0
1340	0
1341	0
1342	0
1343	0
1344	0
1345	0
1346	0
1347	0
1348	0
1349	0
1350	0
1351	0
1352	0
1353	0
1354	0
1355	0
1356	0
1357	0
1358	0
1359	0
1360	0
1361	0
1362	0
1363	0
1364	0
1365	0
1366	0
1367	0
1368	0
1369	0
1370	0
1371	0
1372	0
1373	0
1374	0
1375	0
1376	0
1377	0
1378	0
1379	0
1380	0
1381	0
1382	0
1383	0
1384	0
1385	0
1386	0
1387	0
1388	0
1389	0
1390	0
1391	0
1392	0
1393	0
1394	0
1395	0
1396	0
1397	0
1398	0
1399	0
1400	0
1401	0
1402	0
1403	0
1404	0
1405	0
1406	0
1407	0
1408	0
1409	0
1410	0
1411	0
1412	0
1413	0
1414	0
1415	0
1416	0
1417	0
1418	0
1419	0
1420	0
1421	0
1422	0
1423	0
1424	0
1425	0
1426	0
1427	0
1428	0
1429	0
1430	0
1431	0
1432	0
1433	0
1434	0
1435	0
1436	0
1437	0
1438	0
1439	0
1440	0
1441	0
1442	0
1443	0
1444	0
1445	0
1446	0
1447	0
1448	0
1449	0
1450	0
1451	0
1452	0
1453	0
1454	0
1455	0
1456	0
1457	0
1458	0
1459	0
1460	0
1461	0
1462	0
1463	0
1464	0
1465	0
1466	0
1467	0
1468	0
1469	0
1470	0
1471	0
1472	0
1473	0
1474	0
1475	0
1476	0
1477	0
1478	0
1479	0
1480	0
1481	0
1482	0
1483	0
1484	0
1485	0
1486	0
1487	0
1488	0
1489	0
1490	0
1491	0
1492	0
1493	0
1494	0
1495	0
1496	0
1497	0
1498	0
1499	0
1500	0
1501	0
1502	0
1503	0
1504	0
1505	0
1506	0
1507	0
1508	0
1509	0
1510	0
1511	0
1512	0
1513	0
1514	0
1515	0
1516	0
1517	0
1518	0
1519	0
1520	0
1521	0
1522	0
1523	0
1524	0
1525	0
1526	0
1527	0
1528	0
1529	0
1530	0
1531	0
1532	0
1533	0
1534	0
1535	0
1536	0
1537	0
1538	0
1539	0
1540	0
1541	0
1542	0
1543	0
1544	0
1545	0
1546	0
1547	0
1548	0
1549	0
1550	0
1551	0
1552	0
1553	0
1554	0
1555	0
1556	0
1557	0
1558	0
1559	0
1560	0
1561	0
1562	0
1563	0
1564	0
1565	0
1566	0
1567	0
1568	0
1569	0
1570	0
1571	0
1572	0
1573	0
1574	0
1575	0
1576	0
1577	0
1578	0
1579	0
1580	0
1581	0
1582	0
1583	0
1584	0
1585	0
1586	0
1587	0
1588	0
1589	0
1590	0
1591	0
1592	0
1593	0
1594	0
1595	0
1596	0
1597	0
1598	0
1599	0
1600	0
1601	0
1602	0
1603	0
1604	0
1605	0
1606	0
1607	0
1608	0
1609	0
1610	0
1611	0
1612	0
1613	0
1614	0
1615	0
1616	0
1617	0
1618	0
1619	0
1620	0
1621	0
1622	0
1623	0
1624	0
1625	0
1626	0
1627	0
1628	0
1629	0
1630	0
1631	0
1632	0
1633	0
1634	0
1635	0
1636	0
1637	0
1638	0
1639	0
1640	0
1641	0
1642	0
1643	0
1644	0
1645	0
1646	0
1647	0
1648	0
1649	0
1650	0
1651	0
1652	0
1653	0
1654	0
1655	0
1656	0
1657	0
1658	0
1659	0
1660	0
1661	0
1662	0
1663	0
1664	0
1665	0
1666	0
1667	0
1668	0
1669	0
1670	0
1671	0
1672	0
1673	0
1674	0
1675	0
1676	0
1677	0
1678	0
1679	0
1680	0
1681	0
1682	0
1683	0
1684	0
1685	0
1686	0
1687	0
1688	0
1689	0
1690	0
1691	0
1692	0
1693	0
1694	0
1695	0
1696	0
1697	0
1698	0
1699	0
1700	0
1701	0
1702	0
1703	0
1704	0
1705	0
1706	0
1707	0
1708	0
1709	0
1710	0
1711	0
1712	0
1713	0
1714	0
1715	0
1716	0
1717	0
1718	0
1719	0
1720	0
1721	0
1722	0
1723	0
1724	0
1725	0
1726	0
1727	0
1728	0
1729	0
1730	0
1731	0
1732	0
1733	0
1734	0
1735	0
1736	0
1737	0
1738	0
1739	0
1740	0
1741	0
1742	0
1743	0
1744	0
1745	0
1746	0
1747	0
1748	0
1749	0
1750	0
1751	0
1752	0
1753	0
1754	0
1755	0
1756	0
1757	0
1758	0
1759	0
1760	0
1761	0
1762	0
1763	0
1764	0
1765	0
1766	0
1767	0
1768	0
1769	0
1770	0
1771	0
1772	0
1773	0
1774	0
1775	0
1776	0
1777	0
1778	0
1779	0
1780	0
1781	0
1782	0
1783	0
1784	0
1785	0
1786	0
1787	0
1788	0
1789	0
1790	0
1791	0
1792	0
1793	0
1794	0
1795	0
1796	0
1797	0
1798	0
1799	0
1800	0
1801	0
1802	0
1803	0
1804	0
1805	0
1806	0
1807	0
1808	0
1809	0
1810	0
1811	0
1812	0
1813	0
1814	0
1815	0
1816	0
1817	0
1818	0
1819	0
1820	0
1821	0
1822	0
1823	0
1824	0
1825	0
1826	0
1827	0
1828	0
1829	0
1830	0
1831	0
1832	0
1833	0
1834	0
1835	0
1836	0
1837	0
1838	0
1839	0
1840	0
1841	0
1842	0
1843	0
1844	0
1845	0
1846	0
1847	0
1848	0
1849	0
1850	0
1851	0
1852	0
1853	0
1854	0
1855	0
1856	0
1857	0
1858	0
1859	0
1860	0
1861	0
1862	0
1863	0
1864	0
1865	0
1866	0
1867	0
1868	0
1869	0
1870	0
1871	0
1872	0
1873	0
1874	0
1875	0
1876	0
1877	0
1878	0
1879	0
1880	0
1881	0
1882	0
1883	0
1884	0
1885	0
1886	0
1887	0
1888	0
1889	0
1890	0
1891	0
1892	0
1893	0
1894	0
1895	0
1896	0
1897	0
1898	0
1899	0
1900	0
1901	0
1902	0
1903	0
1904	0
1905	0
1906	0
1907	0
1908	0
1909	0
1910	0
1911	0
1912	0
1913	0
1914	0
1915	0
1916	0
1917	0
1918	0
1919	0
1920	0
1921	0
1922	0
1923	0
1924	0
1925	0
1926	0
1927	0
1928	0
1929	0
1930	0
1931	0
1932	0
1933	0
1934	0
1935	0
1936	0
1937	0
1938	0
1939	0
1940	0
1941	0
1942	0
1943	0
1944	0
1945	0
1946	0
1947	0
1948	0
1949	0
1950	0
1951	0
1952	0
1953	0
1954	0
1955	0
1956	0
1957	0
1958	0
1959	0
1960	0
1961	0
1962	0
1963	0
1964	0
1965	0
1966	0
1967	0
1968	0
1969	0
1970	0
1971	0
1972	0
1973	0
1974	0
1975	0
1976	0
1977	0
1978	0
1979	0
1980	0
1981	0
1982	0
1983	0
1984	0
1985	0
1986	0
1987	0
1988	0
1989	0
1990	0
1991	0
1992	0
1993	0
1994	0
1995	0
1996	0
1997	0
1998	0
[truncated: 98,002 more rows]
