# Supplementary material for: Challenges in measuring nanoparticles and microparticles by single particle ICP-QMS and ICP-TOFMS: size-dependent transport efficiency and limited linear dynamic range
Source: Royal Society of Chemistry journal article supplement (doi:10.1039/d4ja00425f), 2025-01-01
Supplement: d4ja00425f6.xlsx [file d4ja00425f6.xlsx]

## Sheet: Au
Normal Sensitivity
Sample		Average Au Mass (fg)	Theoretical Mass(fg)	Average Au Intensity (Counts)	Predicted Intensiy based on 150 nm
NanoComposix 60nm Au		2.43896	2.18167	97.5582	98.4654
NanoComposix 80nm Au		5.61463	5.17137	224.585	233.399
Nanopartz 100nm Au		11.6273	10.1003	465.092	455.858
Nanopartz 150nm Au		38.463	34.0886	1538.52	1538.52
Nanopartz 200nm Au	2292.73	0
Sigma Millipore 200nm Au		71.1793	80.8027	2847.17	3646.87
Sigma Millipore 300nm Au		180.467	272.709	7218.68	12308.2
Sigma Millipore 400nm Au		226.288	646.421	9051.52	29174.9
Nanopartz 500nm Au
Nanopartz 1000nm Au		365.448	10100.3	14617.9	455858
Nanopartz 1500nm Au		342.437	34088.6	13697.5	1.53852e+06
Nanopartz 500nm Au		340.03	1262.54	13601.2	56982.3
Reduced Sensitivity	22.2862
Sample		Average Au Mass (fg)	Theoretical Mass(fg)	Average Au Intensity (Counts)
NanoComposix 60nm Au		3.84422	2.18167	7.68845	6.19655
NanoComposix 80nm Au		6.86408	5.17137	13.7282	14.6881
Nanopartz 100nm Au		12.9215	10.1003	25.8431	28.6877
Nanopartz 150nm Au		48.4105	34.0886	96.821	96.821
Sigma Millipore 200nm Au		105.665	80.8027	211.33	229.502
Sigma Millipore 300nm Au		319.635	272.709	639.27	774.568
Sigma Millipore 400nm Au		632.771	646.421	1265.54	1836.01
Nanopartz 500nm Au					0
Nanopartz 1000nm Au		4047.57	10100.3	8095.14	455858
Nanopartz 1500nm Au		7224.55	34088.6	14449.1	1.53852e+06
					0
Nanopartz 500nm Au		2306.77	1262.54	4613.54
Number of detected particles for optimized, reduced sensitivities?				=
