# Supplementary material for: Challenges in measuring nanoparticles and microparticles by single particle ICP-QMS and ICP-TOFMS: size-dependent transport efficiency and limited linear dynamic range
Source: Royal Society of Chemistry journal article supplement (doi:10.1039/d4ja00425f), 2025-01-01
Supplement: d4ja00425f7.xlsx [file d4ja00425f7.xlsx]

## Sheet: _xltb_storage_
XL Toolbox Settings
	export_preset	<?xml version="1.0" encoding="utf-16"?>_x000D_ <Preset xmlns:xsd="http://www.w3.org/2001/XMLSchema" xmlns:xsi="http://www.w3.org/2001/XMLSchema-instance">_x000D_ <Name>Tiff, 600 dpi, RGB, White canvas</Name>_x000D_ <Dpi>600</Dpi>_x000D_ <FileType>Tiff</FileType>_x000D_ <ColorSpace>Rgb</ColorSpace>_x000D_ <Transparency>WhiteCanvas</Transparency>_x000D_ <UseColorProfile>false</UseColorProfile>_x000…
	export_path	D:\MyFilesCF\Papers\2024 JAAS Linearity and Transport Eff\Figures for paper\Hi Res Figures\Fig 3a.tif

## Sheet: Summary
					Calc. by AVERAGE fnc														200k?		If 100k	If 200k
Size (nm)	Size (nm) Si in SiO2	Density	Particle mass (fg)	Mass (fg) Si	Normal int (counts)	Normal int (counts/s)	Std Dev	Counts/fg	Mass (fg) of particles	Size (nm) of Si in particles	Meas size/actual size	Particle mass/690 particle mass	Particle int/690 particle int	Si in SiO2 particle counts/fg		SiO2 density		# particles	# particles/mL (using 6% TE from Au NP#)	# particles/mL (using 12% TE from Au NP#)	SiO2 NP# TE	SiO2 NP# TE
480	384.394	2.2	127.389	59.4482	297.778	992595	92.6704	5.00904	60.9015	387.501	1.00808			5.00904		2		2859	190791	95395.4	0.11622	0.0581098		Meas. Time	3	mins
690	535.288	2	344.004	160.535	776.734	2.58911e+06	268.055	4.83841	158.857	533.416	0.996504	2.70042	2.60843	4.83841				2538	169369	84684.7	0.103171	0.0515854		# particles/mL in suspension	200000	Lucas says #/mL is 100,000	100000
730	584.6	2.2	448.102	209.114	1008.16	3.36053e+06	326.191	4.82108	206.188	581.86	0.995313	3.51759	3.3856	4.82108				2367	157958	78979	0.0962195	0.0481098		Uptake rate	0.082	mL/min
895	694.322	2	750.732	350.342	1421.09	4.73695e+06	504.328		290.64	652.403	0.939625	5.89322	4.7723	4.05629				2404	160427	80213.5	0.0977236	0.0488618		Vol. to ICP if 6% TE	0.014985
990	792.813	2.2	1117.67	521.58	1881.48	6.27159e+06	706.082		384.799	716.377	0.903589	8.77368	6.31838	3.60727				1917	127928	63964	0.0779268	0.0389634		60 nm Au NP# TE	0.0609146
1570	1175.94	1.8	3647.18	1702.02	3092.78	1.03093e+07	1268.32		632.534	845.458	0.718963	28.6302	10.3862	1.81713				1161	77477.5	38738.7	0.0471951	0.0235976		Vol. to ICP if 12% TE	0.02997
2060	1598.1	2	9154.14	4271.93	4077.41	1.35914e+07	1634.29		833.909	927.051	0.580094	71.8597	13.6928	0.954464				921	61461.5	30730.7	0.037439	0.0187195		60 nm Au NP# TE	0.121829
3170	2459.22	2	33357.5	15566.8	4578.54	1.52618e+07	2897.52		936.402	963.573	0.391821	261.855	15.3757	0.294122				324	21621.6	10810.8	0.0131707	0.00658537
					0.890546		Average	4.88951																Neb gas flow rate?
																								Soln-NP TE if Au particles are 50 nm?
																								Au solution sensitivity
		2.7																						Si solution sensitivity
																								Where did 8% TE come from in notes for 690 nm SiO2
					Calc. by AVERAGE fnc													0.33893	0.66107
Size (nm)	Size (nm) Si in SiO2	Density	Particle mass (fg)	Mass (fg) Si	Reduced int (counts)	Reduced int (counts/s)	Std Dev	Counts/fg*11	Mass (fg) of particles	Size (nm) of Si in particles	Meas size/actual size	Particle mass/690 particle mass	Particle int/690 particle int					# particles	# particles/mL			NP# TE
480	384.394	2.2	127.389	59.4482	39.6343	132114	10.0076	0.666703	92.9068	446.08	1.16048				Low int cut off by threshold			945	63063.1	31531.5	0.0384146	0.0192073
690	535.288	2	344.004	160.535	68.5296	228432	28.7857	0.426883	160.64	535.404	1.00022							2176	145212	72605.9	0.0884553	0.0442276
730	584.6	2.2	448.102	209.114	94.3046	314349	37.9027	0.450971	221.059	595.525	1.01869	1.30261	1.37611					1754	117050	58525.2	0.0713008	0.0356504
895	694.322	2	750.732	350.342	147.551	491838	60.0405	0.421164	345.875	691.359	0.995732	2.18234	2.1531					1886	125859	62929.6	0.0766667	0.0383333
990	792.813	2.2	1117.67	521.58	224.745	749151	94.3772	0.430893	526.825	795.462	1.00334	3.24901	3.27953					1819	121388	60694	0.0739431	0.0369715
1570	1175.94	1.8	3647.18	1702.02	686.092	2.28697e+06	311.231	0.403105	1608.27	1153.94	0.981291	10.6022	10.0116					1117	74541.2	37270.6	0.0454065	0.0227033
2060	1598.1	2	9154.14	4271.93	1532.78	5.10927e+06	583.074	0.358803	3592.99	1508.51	0.943939	26.6106	22.3667					989.5	66032.7	33016.3	0.0402236	0.0201118
3170	2459.22	2	33357.5	15566.8	2349.84	7.8328e+06	767.279	0.150952	5508.26	1739.41	0.707302	96.9685	34.2894					681	45445.4	22722.7	0.0276829	0.0138415
							Average	0.426603
Primary x-axis	Multiply by	Secondary x-axis
450	3333.33	1.5e+06			11.3343					Sens Reduction factor
							27.4327	0.692146		11.75

## Sheet: 60nmAu
Index	timestamp (s)	[197Au]+ (cts)		# detected particles	999
27	0.0482121	35.4034		Meas. time	2	mins
63	0.119766	48.1774		#/mL in suspension	100000
105	0.203702	51.8505		Uptake rate	82	uL/min
153	0.299676	59.1382			0.082	mL/min
174	0.341604	30.9392		TE	0.0609146
206	0.405692	32.2867
222	0.437776	29.5073		Avg. int (counts)	37.4306
257	0.507722	35.025		Mass of 60 nm Au NP	2.18
321	0.635768	26.1497		Mass of 50 nm Au NP	1.26
337	0.667631	23.5718
368	0.729663	52.654		c/fg if 60 nm Au NP	17.17
389	0.771624	29.5429		c/fg if 50 nm Au NP	29.7068	50 nm Au NP measured 4/19/19 had sensitivity of 48 c/fg
423	0.839638	37.9581
502	0.997585	29.3563
512	1.0177	32.9105
636	1.26559	59.4002
648	1.28957	38.6483
781	1.55553	39.2588
822	1.63768	12.3253
893	1.77956	16.0912
940	1.87349	42.6872
986	1.96553	26.4219
992	1.9776	18.2154
996	1.9855	53.6975
1036	2.06554	43.1902
1046	2.08577	37.2234
1055	2.10357	23.2443
1230	2.45371	33.0082
1319	2.63147	50.3494
1384	2.76155	41.2977
1437	2.86747	11.1497
1460	2.91338	44.5929
1530	3.05342	32.6992
1567	3.12735	30.7553
1591	3.17576	22.6503
1595	3.1842	21.0654
1698	3.38937	20.1409
1948	3.88932	17.6422
1956	3.90529	12.7867
1989	3.97126	28.2363
2001	3.99524	85.1214
2061	4.11532	38.2469
2096	4.18534	51.9497
2143	4.27966	37.1026
2207	4.40725	42.2307
2242	4.47722	27.1486
2293	4.57924	20.4549
2325	4.64321	42.7361
2473	4.93921	43.8006
2635	5.26327	29.9885
2724	5.44119	41.0529
2733	5.45929	28.7478
2897	5.7872	24.5169
2982	5.95707	44.6712
2984	5.9611	21.7714
3017	6.02712	50.4324
3033	6.05908	31.7626
3102	6.19707	39.4803
3113	6.21907	42.8145
3134	6.26109	58.0613
3136	6.26505	39.7846
3166	6.32517	30.8976
3244	6.48105	38.2992
3295	6.58306	23.5613
3368	6.72903	44.722
3427	6.84701	49.959
3437	6.86706	35.3714
3595	7.18299	38.7219
3632	7.25696	33.6697
3637	7.26702	36.5348
3654	7.30103	10.5586
3676	7.34494	43.275
3681	7.355	42.3665
3699	7.39096	29.9365
3744	7.48096	14.439
3842	7.67694	31.7013
4006	8.00485	22.0249
4055	8.10296	34.6728
4071	8.13495	28.4566
4222	8.43686	36.8738
4350	8.69281	12.8592
4389	8.77088	49.6155
4434	8.86081	60.2946
4445	8.88287	26.2555
4549	9.0908	39.7164
4612	9.21681	32.8338
4628	9.24873	16.5051
4740	9.47274	27.9969
4776	9.54473	32.6199
4826	9.64473	56.9321
4830	9.65276	39.7456
4891	9.77468	26.6962
4927	9.84679	54.6793
5090	10.1727	22.5637
5173	10.3387	35.039
5183	10.3587	43.0174
5208	10.4087	26.1308
5278	10.5487	43.1018
5655	11.3027	23.5255
5697	11.3866	21.9747
5749	11.4906	15.5193
5760	11.5126	34.8694
5829	11.6506	60.2249
5947	11.8865	53.0113
5966	11.9245	34.35
5972	11.9365	33.186
6168	12.3287	34.6174
6193	12.3784	15.2842
6239	12.4706	14.1943
6265	12.5225	57.6314
6306	12.6045	25.0281
6397	12.7864	50.7135
6457	12.9064	37.4927
6482	12.9564	30.3638
6602	13.1964	16.1019
6607	13.2065	51.3749
6611	13.2145	25.741
6631	13.2545	40.4258
6744	13.4803	30.2775
6850	13.6924	35.5383
6884	13.7605	14.5359
6954	13.9003	32.8894
6998	13.9883	36.7245
7026	14.0443	18.2295
7079	14.1503	43.5236
7108	14.2083	27.1122
7173	14.3389	9.99759
7175	14.3425	31.9381
7310	14.6123	28.7783
7353	14.6982	35.1847
7381	14.7542	49.3074
7436	14.8643	26.7369
7449	14.8903	42.9852
7502	14.9962	34.9694
7778	15.5482	20.6181
7785	15.5621	44.8786
7997	15.9861	57.8221
8032	16.0561	14.4753
8090	16.1721	31.7167
8151	16.2941	37.1113
8173	16.3381	31.2965
8182	16.3561	24.438
8247	16.4861	34.8505
8312	16.6161	55.8948
8425	16.8421	35.1902
8436	16.864	21.0412
8446	16.8841	37.2347
8477	16.9461	21.654
8491	16.974	23.6528
8587	17.166	23.7124
8608	17.208	23.2486
8618	17.228	24.0642
8685	17.362	34.1302
8795	17.582	43.0209
8798	17.5879	67.9745
8809	17.61	23.8948
8844	17.6799	29.549
8864	17.7199	24.5667
9149	18.2899	31.5636
9281	18.5539	32.5156
9356	18.7038	18.4249
9446	18.8838	57.8138
9508	19.0078	35.8712
9596	19.1838	69.0716
9639	19.2698	20.2388
9662	19.3158	44.0049
9665	19.3218	26.4394
9676	19.3437	38.0394
9782	19.5558	16.539
9842	19.6757	35.5725
9860	19.7118	11.1387
9864	19.7197	20.6299
9892	19.7757	38.725
10026	20.0437	22.6482
10042	20.0757	34.7341
10090	20.1717	54.289
10106	20.2037	45.5975
10108	20.2077	45.9355
10203	20.3977	27.5126
10255	20.5017	38.7998
10308	20.6076	45.8006
10316	20.6237	48.8558
10538	21.0676	32.6028
10603	21.1976	35.8927
10644	21.2796	73.4569
10913	21.8175	30.9858
10965	21.9215	9.85665
10989	21.9697	39.746
11050	22.0915	9.225
11139	22.2696	30.1817
11246	22.4834	35.3126
11254	22.4995	30.0515
11306	22.6035	20.342
11394	22.7794	24.148
11461	22.9134	30.4942
11512	23.0154	47.4891
11585	23.1614	55.4371
11598	23.1874	17.7096
11619	23.2294	62.0437
11644	23.2794	25.2874
11652	23.2954	43.5557
11688	23.3674	70.1827
11697	23.3854	18.936
11783	23.5574	40.7669
11825	23.6414	41.9696
11917	23.8253	60.475
12105	24.2013	26.0149
12235	24.4612	45.3495
12363	24.7173	25.1671
12367	24.7252	33.585
12673	25.3372	81.4152
12706	25.4032	101.116
12733	25.4572	101.762
12758	25.5072	28.0886
12810	25.6111	19.8343
12914	25.8191	43.8944
12921	25.8331	42.2506
12936	25.8631	16.0342
12953	25.8971	39.208
13133	26.2571	52.5955
13138	26.2671	29.7337
13163	26.3171	40.6491
13188	26.3675	52.2743
13279	26.549	162.849
13365	26.721	21.2279
13540	27.071	57.5605
13764	27.519	16.9605
13915	27.8209	97.2206
13983	27.9569	36.48
14036	28.0629	33.3282
14202	28.3948	45.4024
14208	28.4069	15.7497
14293	28.5768	31.1106
14386	28.7628	61.6168
14481	28.9528	56.637
14488	28.9669	12.4517
14533	29.0568	53.3531
14694	29.3787	35.2542
14732	29.4547	58.8515
14747	29.4848	32.4907
14779	29.5487	11.4376
14805	29.6007	36.4344
14844	29.6788	36.071
14865	29.7207	30.683
14964	29.9187	36.8188
15182	30.3547	78.1018
15283	30.5567	36.8282
15411	30.8126	29.8087
15417	30.8246	41.9073
15437	30.8646	33.4852
15473	30.9366	40.2631
15658	31.3066	19.763
15699	31.3886	35.9691
15716	31.4226	32.4697
15815	31.6205	39.5804
15849	31.6885	43.6922
15892	31.7745	45.8177
15907	31.8045	69.5881
15998	31.9865	37.9196
16032	32.0547	25.7594
16090	32.1704	78.5443
16109	32.2085	45.6322
16174	32.3385	57.4138
16208	32.4065	57.8937
16258	32.5066	16.7636
16315	32.6204	16.1491
16349	32.6884	31.2966
16422	32.8344	27.5583
16505	33.0004	34.5905
16513	33.0164	12.6711
16520	33.0305	29.6885
16547	33.0844	38.5924
16632	33.2544	57.4862
16685	33.3604	46.9882
16724	33.4384	24.8373
16726	33.4424	29.585
16744	33.4784	46.2538
16844	33.6783	37.3223
16854	33.6983	19.8358
16879	33.7483	5.58625
16990	33.9703	25.5412
17032	34.0543	23.8253
17159	34.3083	57.1418
17186	34.3623	31.698
17219	34.4283	31.9547
17270	34.5302	89.3035
17312	34.6143	32.9218
17360	34.7103	26.8281
17413	34.8162	34.5149
17435	34.8602	50.2697
17441	34.8722	22.2811
17506	35.0022	44.4915
17532	35.0542	61.2681
17546	35.0823	27.4699
17572	35.1342	29.4433
17589	35.1682	34.9496
17623	35.2362	21.0678
17664	35.3182	37.5401
17683	35.3562	23.5737
17728	35.4462	55.5
17898	35.7862	88.7506
18074	36.1381	42.2206
18098	36.1861	27.7914
18114	36.2181	25.3902
18190	36.3701	22.5039
18319	36.6281	37.0892
18394	36.7781	29.1573
18569	37.128	40.723
18599	37.188	35.7196
18903	37.7959	17.9111
18954	37.8979	47.792
18997	37.9839	23.7448
19039	38.0679	16.3257
19046	38.0819	34.3785
19122	38.2339	46.822
19165	38.3199	25.4306
19170	38.3299	52.4678
19225	38.4399	30.1726
19326	38.6419	31.9389
19603	39.1958	28.2837
19790	39.5697	31.113
19879	39.7478	35.3338
19902	39.7937	17.7041
19935	39.8597	36.395
19980	39.9497	34.5102
20017	40.0237	18.1793
20034	40.0577	64.6677
20053	40.0957	35.1119
20246	40.4816	48.2818
20282	40.5537	19.2985
20416	40.8216	71.5343
20544	41.0776	21.1943
20573	41.1356	43.718
20791	41.5716	37.5911
20868	41.7255	42.4377
20929	41.8475	20.3988
21029	42.0475	32.6783
21190	42.3694	23.3242
21255	42.4995	25.254
21276	42.5414	64.1547
21331	42.6514	29.3385
21370	42.7295	40.9138
21396	42.7815	64.7898
21465	42.9194	13.9526
21480	42.9494	50.5779
21497	42.9834	30.3953
21568	43.1254	39.8785
21666	43.3214	29.501
21670	43.3293	12.0906
21684	43.3574	46.6753
21717	43.4234	31.6878
21730	43.4494	48.1305
21865	43.7193	39.3703
22072	44.1333	22.8706
22111	44.2113	66.2007
22146	44.2813	78.3669
22164	44.3172	37.1777
22222	44.4332	20.7979
22300	44.5893	50.3551
22310	44.6092	87.0818
22446	44.8812	38.0663
22510	45.0092	31.2645
22557	45.1032	20.2646
22576	45.1412	25.4726
22824	45.6372	34.7171
22865	45.7191	30.465
22870	45.7291	23.4585
22971	45.9311	22.0448
23012	46.0131	26.6899
23078	46.1451	17.3719
23194	46.3771	18.251
23239	46.467	30.0255
23273	46.5351	40.1853
23322	46.633	36.653
23376	46.741	37.0103
23627	47.2429	47.8741
23655	47.2989	38.552
23665	47.319	30.1679
23672	47.333	36.494
23850	47.6889	18.1709
23922	47.8329	40.8975
23975	47.9389	51.6058
24030	48.0489	33.3879
24045	48.0789	52.0069
24071	48.1309	18.7158
24144	48.2769	10.9389
24150	48.2889	19.268
24174	48.3369	34.5782
24227	48.4429	23.8622
24287	48.5628	44.7251
24294	48.5769	42.3713
24305	48.5989	22.7245
24528	49.0448	31.9187
24562	49.1128	39.1571
24580	49.1489	22.0298
24678	49.3448	28.3555
24709	49.4067	23.2342
24806	49.6008	107.438
24991	49.9707	16.2646
25001	49.9908	24.2307
25006	50.0008	31.8203
25041	50.0707	26.0943
25068	50.1247	28.6551
25073	50.1347	34.9683
25121	50.2308	33.8392
25142	50.2727	36.3959
25149	50.2867	32.7532
25186	50.3607	26.4187
25204	50.3966	21.3036
25281	50.5507	20.2471
25336	50.6606	64.1243
25419	50.8266	28.5472
25442	50.8726	25.1539
25495	50.9786	68.642
25547	51.0826	25.1985
25563	51.1146	41.4764
25724	51.4365	30.4556
25822	51.6325	24.5103
25836	51.6606	27.65
25848	51.6845	23.3397
25859	51.7066	16.9291
25903	51.7945	35.8166
25989	51.9667	29.4525
25996	51.9805	63.1367
26015	52.0185	32.9933
26076	52.1405	34.7818
26078	52.1445	64.5613
26137	52.2625	31.1884
26168	52.3245	55.5293
26233	52.4545	32.2166
26280	52.5485	52.497
26308	52.6044	22.7877
26374	52.7364	84.9517
26388	52.7644	27.9263
26531	53.0505	24.9167
26543	53.0744	70.7289
26616	53.2204	30.58
26661	53.3104	47.5214
26749	53.4864	25.0103
26885	53.7584	57.6081
26894	53.7763	37.1585
26898	53.7843	51.1756
26924	53.8363	31.8506
26927	53.8423	37.2089
26929	53.8463	30.8871
26935	53.8583	37.2005
26961	53.9103	17.2376
26963	53.9143	21.9156
27031	54.0503	40.0796
27434	54.8562	45.0891
27558	55.1041	22.4265
27578	55.1442	29.1498
27609	55.2062	53.2113
27612	55.2122	60.8981
27662	55.3122	72.6497
27690	55.3682	33.5992
27706	55.4002	19.183
27718	55.4242	30.1195
27778	55.5442	44.2633
27781	55.5501	25.4753
27786	55.5601	21.4438
27847	55.6822	38.238
27935	55.8581	99.6953
27993	55.9741	28.0245
28334	56.656	18.4669
28347	56.682	31.9219
28456	56.9	25.6254
28460	56.908	26.2972
28462	56.912	58.3249
28465	56.9181	28.7652
28511	57.01	22.6013
28552	57.092	29.6838
28606	57.2	25.9447
28685	57.358	4.56619
28728	57.4439	12.5906
28744	57.476	9.27752
28860	57.7079	24.7963
28862	57.7119	46.0269
28882	57.7519	9.87816
28970	57.9279	32.0406
29163	58.3139	42.988
29223	58.4339	30.2158
29234	58.4559	49.4306
29445	58.8778	29.6191
29501	58.9898	43.1219
29525	59.0378	67.7585
29558	59.1038	38.6425
29578	59.1438	50.7341
29747	59.4817	22.3176
29797	59.5817	58.2593
29892	59.7719	25.7289
29930	59.8477	18.2525
30070	60.1277	46.8463
30080	60.1477	45.7463
30134	60.2557	21.9969
30138	60.2637	45.5447
30276	60.5397	40.4987
30364	60.7157	60.9385
30404	60.7957	20.6247
30428	60.8436	32.8543
30611	61.2096	30.2071
30694	61.3757	32.9116
30843	61.6736	28.9623
30858	61.7036	26.2451
30882	61.7515	39.1381
30921	61.8295	43.8954
30992	61.9715	31.4884
31059	62.1055	15.8293
31110	62.2075	25.2621
31215	62.4175	79.5213
31230	62.4475	47.1809
31312	62.6114	47.5933
31328	62.6435	51.9428
31338	62.6634	24.2328
31366	62.7194	30.839
31404	62.7954	43.7944
31417	62.8214	42.0787
31448	62.8834	18.2661
31527	63.0414	36.4817
31603	63.1934	36.4774
31741	63.4694	49.3386
31773	63.5333	34.9347
31779	63.5454	43.6779
31886	63.7594	44.0969
31913	63.8133	51.0254
31935	63.8573	20.6924
32061	64.1093	40.622
32071	64.1293	64.0162
32161	64.3093	32.153
32246	64.4792	25.9578
32421	64.8294	35.7419
32446	64.8792	65.255
32459	64.9052	32.581
32476	64.9392	31.7063
32547	65.0812	32.1329
32559	65.1052	10.8474
32605	65.1972	9.85738
32754	65.4952	22.7615
32764	65.5151	31.1509
32860	65.7071	25.5661
32938	65.8633	31.0176
32985	65.9571	20.4868
33007	66.0011	26.0527
33039	66.0651	20.107
33226	66.4391	68.6663
33277	66.5411	37.68
33346	66.679	33.6135
33414	66.815	16.3811
33437	66.861	26.8962
33444	66.875	35.9552
33522	67.0312	15.5679
33530	67.047	29.5428
33578	67.143	33.2024
33620	67.227	27.5212
33726	67.439	21.2088
33807	67.6009	37.6539
33825	67.637	49.2454
33877	67.7409	45.8563
33925	67.8369	26.0253
33998	67.9829	89.7383
34007	68.0009	30.4231
34061	68.1089	29.2483
34158	68.3029	17.987
34452	68.8908	32.2692
34468	68.9228	92.4409
34482	68.9508	10.9034
34567	69.1208	34.9697
34754	69.4948	42.6758
34775	69.5368	18.673
34784	69.5548	50.071
34789	69.5648	32.8465
34825	69.6367	45.5838
35064	70.1148	18.5387
35214	70.4147	39.6726
35246	70.4787	36.9427
35257	70.5008	35.5608
35360	70.7066	36.7452
35387	70.7607	39.7709
35599	71.1846	44.2845
35603	71.1925	60.3909
35643	71.2726	26.8504
35661	71.3086	24.8896
35797	71.5805	69.0374
35895	71.7765	20.5414
35913	71.8125	18.7451
35941	71.8686	30.2038
35949	71.8845	45.2647
36047	72.0805	37.9523
36066	72.1185	39.0088
36097	72.1804	30.553
36124	72.2345	44.9258
36129	72.2445	83.1082
36170	72.3265	26.5984
36330	72.6464	28.2121
36479	72.9444	48.9245
36530	73.0464	28.2254
36584	73.1544	74.4993
36620	73.2264	77.3341
36671	73.3284	24.7894
36696	73.3784	22.4828
36890	73.7663	37.246
36895	73.7763	39.1434
36968	73.9223	35.3286
36992	73.9703	27.9207
37060	74.1064	26.1618
37099	74.1843	21.3316
37157	74.3003	27.3983
37366	74.7182	22.619
37450	74.8862	44.1991
37456	74.8982	50.2759
37485	74.9562	29.6115
37487	74.9602	34.4628
37532	75.0502	21.6678
37634	75.2541	31.1953
37672	75.3302	55.8108
37714	75.4142	61.9286
37820	75.6261	40.891
37827	75.6401	46.1196
37838	75.6621	28.1429
37921	75.8281	40.623
38011	76.0081	42.5886
38025	76.0361	42.0242
38229	76.444	41.3982
38272	76.53	34.8017
38278	76.542	42.2053
38304	76.594	15.2296
38338	76.662	20.0301
38401	76.788	40.2803
38446	76.878	19.2007
38541	77.068	23.7855
38611	77.208	33.1142
38689	77.3639	36.8686
38842	77.6699	41.8101
38868	77.7219	43.3779
38901	77.7879	24.9087
38927	77.8402	99.1229
38955	77.8959	68.4956
38961	77.9079	55.3533
38965	77.9159	20.5561
39040	78.0659	30.0427
39110	78.2059	14.6416
39138	78.2619	23.6806
39234	78.4539	48.8869
39334	78.6538	51.3518
39387	78.7599	49.4798
39661	79.3078	36.8297
39665	79.3158	41.2795
39751	79.4877	17.32
39799	79.5837	37.4561
39870	79.7258	17.4588
39877	79.7397	17.3025
39928	79.8417	94.9224
39941	79.8677	26.6498
39960	79.9057	19.225
39990	79.9658	40.8757
40018	80.0217	20.9019
40135	80.2557	14.6345
40162	80.3097	98.2473
40166	80.3177	30.3292
40312	80.6097	38.8619
40322	80.6296	27.7353
40376	80.7376	39.6606
40382	80.7496	16.1861
40493	80.9716	53.7254
40522	81.0296	33.669
40635	81.2555	22.0794
40679	81.3436	75.7686
40744	81.4735	40.1792
40768	81.5216	35.049
40844	81.6735	41.5736
40956	81.8975	31.1631
40972	81.9295	52.3937
40978	81.9416	12.2863
40995	81.9755	30.3222
41185	82.3554	46.8054
41262	82.5094	28.9401
41265	82.5154	32.9885
41396	82.7774	38.0752
41434	82.8534	47.3628
41473	82.9314	27.8775
41523	83.0315	26.1435
41564	83.1134	61.7461
41580	83.1454	41.6565
41652	83.2894	32.3992
41765	83.5153	20.4793
41781	83.5473	33.1864
41826	83.6373	63.2497
41866	83.7173	48.4187
41876	83.7373	23.3156
41954	83.8933	56.6992
41957	83.8993	43.3203
42038	84.0613	38.7674
42132	84.2493	25.4696
42306	84.5972	39.2634
42332	84.6493	59.3905
42375	84.7352	34.9567
42656	85.2971	48.1244
42734	85.4531	63.2458
42749	85.4832	22.8638
42751	85.4871	41.2757
42761	85.5072	45.8565
42777	85.5391	38.1063
42792	85.5692	24.8879
42830	85.6451	30.9393
42958	85.9012	49.5099
43016	86.0172	16.7124
43095	86.1751	83.0319
43137	86.2591	53.731
43381	86.747	39.3968
43425	86.835	22.2635
43440	86.865	45.1548
43584	87.1531	58.9508
43757	87.4989	27.0492
43861	87.7069	25.3079
43935	87.8549	34.0307
43950	87.885	42.2541
44001	87.9869	37.9204
44056	88.0969	22.0608
44091	88.1668	83.1641
44105	88.1948	21.697
44126	88.2368	42.936
44143	88.2708	51.9033
44161	88.3068	33.1279
44252	88.4889	47.6429
44279	88.5429	22.7442
44427	88.8389	57.7714
44500	88.9847	62.7965
44540	89.0647	36.4653
44584	89.1528	53.4025
44624	89.2328	32.0302
44680	89.3449	31.3329
44731	89.4468	39.8147
44761	89.5068	27.0527
44782	89.5487	14.6964
44872	89.7286	35.496
44902	89.7887	60.2796
44905	89.7947	46.5479
44913	89.8107	49.622
44998	89.9807	22.5048
45025	90.0346	43.9423
45028	90.0406	33.3608
45038	90.0607	20.8693
45126	90.2366	10.6557
45133	90.2507	26.5998
45187	90.3587	24.732
45224	90.4326	19.405
45305	90.5946	17.9698
45365	90.7146	14.4412
45385	90.7549	23.2352
45394	90.7727	52.6105
45407	90.7986	31.1115
45556	91.0966	47.9735
45599	91.1826	20.8013
45608	91.2006	29.4654
45632	91.2485	34.7224
45674	91.3326	37.3622
45746	91.4765	22.789
45886	91.757	28.6862
45910	91.8045	70.2714
45947	91.8785	14.6383
45951	91.8866	52.2482
45968	91.9205	55.7599
46030	92.0445	15.6644
46051	92.0864	72.1976
46143	92.2704	20.4062
46245	92.4744	44.3394
46346	92.6764	41.162
46410	92.8045	54.4335
46427	92.8385	34.9566
46494	92.9724	22.8115
46606	93.1963	31.9766
46654	93.2924	16.9368
46693	93.3703	41.3914
46764	93.5126	42.7418
46799	93.5823	30.3347
46846	93.6764	36.4843
46898	93.7803	48.1645
47019	94.0223	27.0025
47026	94.0363	69.1468
47039	94.0624	41.2985
47100	94.1843	56.1625
47115	94.2143	24.8744
47139	94.2622	51.6788
47149	94.2823	40.0493
47152	94.2883	34.3614
47185	94.3542	23.0446
47235	94.4542	27.5855
47258	94.5002	41.1969
47360	94.7042	60.4728
47384	94.7522	69.9614
47413	94.8102	32.5125
47427	94.8381	35.6649
47467	94.9182	26.161
47506	94.9962	44.1246
47607	95.1982	52.9461
47678	95.3402	29.9793
47720	95.4242	63.7132
47753	95.4901	69.2998
47760	95.5042	27.1386
47852	95.6882	29.0158
48011	96.006	21.083
48030	96.0441	36.5838
48166	96.316	51.9881
48187	96.3581	29.2733
48276	96.5361	58.5504
48489	96.9621	25.3315
48543	97.07	22.7222
48566	97.116	41.337
48760	97.5039	36.3072
48769	97.5219	36.2565
48793	97.5699	50.0696
48901	97.7859	31.2693
48903	97.7899	58.0949
48905	97.794	31.6773
49058	98.0998	53.5136
49064	98.1118	24.6343
49270	98.5238	35.0406
49374	98.7318	30.6806
49394	98.7718	62.8366
49431	98.846	37.1383
49474	98.9317	14.5723
49577	99.1378	49.2423
49686	99.3557	27.7734
49717	99.4178	43.8219
49731	99.4458	15.0651
49919	99.8217	22.0699
49995	99.9736	87.8247
49998	99.9796	30.2139
50177	100.338	29.256
50285	100.554	9.53122
50379	100.742	42.5387
50408	100.8	41.5289
50477	100.938	21.8492
50555	101.094	73.7394
50607	101.198	34.115
50621	101.226	38.2141
50669	101.322	11.1518
50689	101.362	36.3757
50711	101.406	16.2322
50838	101.66	22.1937
51075	102.133	32.425
51119	102.221	32.0243
51122	102.227	47.0556
51154	102.291	70.2512
51164	102.312	27.0632
51182	102.347	15.9366
51201	102.385	39.3774
51247	102.477	29.4213
51249	102.481	50.3139
51290	102.563	26.7886
51350	102.683	28.4722
51362	102.707	32.2332
51369	102.721	30.3851
51371	102.725	34.325
51630	103.243	26.8251
51856	103.695	100.301
51867	103.718	26.023
51906	103.795	36.2655
52009	104.001	25.9851
52039	104.061	32.4464
52125	104.233	41.814
52311	104.605	19.4634
52394	104.771	50.967
52408	104.799	24.5138
52415	104.813	17.1989
52509	105.001	56.2226
52562	105.107	42.4506
52585	105.153	18.7141
52595	105.173	29.397
52627	105.237	28.3335
52691	105.365	42.3422
52726	105.435	52.6176
52776	105.535	32.0927
52787	105.557	36.103
52827	105.637	51.0055
52883	105.749	43.528
52920	105.823	34.7203
52936	105.855	81.8172
53022	106.027	24.0187
53070	106.123	27.45
53275	106.533	68.2557
53302	106.587	25.2746
53365	106.713	38.493
53392	106.767	41.3243
53399	106.781	40.103
53446	106.875	35.6288
53536	107.055	22.6505
53649	107.281	38.6918
53664	107.311	48.7493
53685	107.353	43.2895
53869	107.721	62.8623
54005	107.993	29.6963
54130	108.243	38.7345
54193	108.369	32.311
54242	108.467	39.2438
54250	108.483	24.7561
54311	108.605	33.5401
54371	108.725	25.2828
54381	108.745	29.4875
54661	109.305	63.9183
54668	109.319	39.6899
54697	109.377	58.5329
54754	109.491	46.8029
54804	109.591	50.5997
54878	109.739	28.283
54918	109.819	27.6074
55093	110.169	32.2543
55098	110.179	26.2283
55113	110.209	17.9667
55135	110.253	34.1347
55230	110.443	82.9852
55237	110.457	30.1496
55266	110.515	43.5244
55467	110.917	36.1439
55514	111.011	31.0324
55521	111.025	31.2765
55603	111.189	27.818
55619	111.221	50.908
55694	111.371	51.2798
55873	111.729	40.6234
55927	111.836	41.01
55949	111.881	14.1282
56009	112	24.0887
56054	112.09	56.3192
56086	112.154	46.9294
56109	112.2	38.9231
56149	112.28	23.5495
56169	112.321	11.7806
56181	112.345	20.8999
56270	112.522	27.1523
56281	112.544	86.1239
56319	112.62	24.0869
56491	112.964	46.4865
56532	113.046	26.2238
56538	113.059	39.3027
56610	113.202	47.2107
56615	113.212	99.3575
56624	113.23	25.0627
56704	113.39	15.1072
56715	113.412	51.7578
56737	113.456	80.7766
56832	113.646	47.2638
56840	113.662	23.5484
56968	113.918	19.241
57000	113.982	64.2778
57073	114.128	110.4
57118	114.218	23.0923
57198	114.38	33.4541
57266	114.514	104.151
57274	114.53	33.9507
57377	114.736	28.7137
57388	114.758	32.0056
57528	115.038	24.3649
57565	115.112	46.6801
57623	115.228	30.2555
57654	115.29	54.4822
57756	115.494	50.2384
57800	115.582	60.6601
58050	116.082	42.5207
58121	116.224	31.1484
58190	116.362	72.3586
58211	116.404	46.1144
58288	116.558	18.8408
58305	116.592	18.2624
58344	116.67	101.03
58353	116.688	34.8827
58391	116.764	19.9866
58440	116.862	48.5877
58444	116.87	25.2315
58459	116.9	18.3349
58570	117.122	24.2263
58592	117.166	48.3939
58646	117.274	48.6427
58711	117.404	26.684
58788	117.558	48.4471
58807	117.596	43.8572
58831	117.644	30.1316
59070	118.122	44.3384
59115	118.212	34.7793
59153	118.288	25.3342
59157	118.296	73.6059
59287	118.556	53.6805
59359	118.7	93.5355
59376	118.734	56.9187
59409	118.8	44.5231
59465	118.912	34.0684
59603	119.188	34.0249
59635	119.252	48.3759
59784	119.55	66.5195
59821	119.624	50.7012
59927	119.836	34.1028
59968	119.918	25.2623
59991	119.964	18.3826
60001	119.984	41.4494
60043	120.068	37.8744
60093	120.168	24.132
60164	120.31	49.9767
60171	120.324	57.8219
60175	120.332	63.1782

## Sheet: 480red
[28Si]+ (cts)	[29Si]+ (cts)	Average intensity (counts)	m/z	% abd	Average int (cts)	Abd corr			Size (nm) edge	Size (nm) center	Pb mass (fg)		Average intensity (counts), All	Average intensity (counts), No small		Low end cut-off
33.7135		39.6343	28	0.9223	39.6343	42.9734			0	0			39.6343	39.4453
55.2906			29	0.0467	7.05398	151.049			4	2	0
55.392									8	6	0
30.3497									12	10	0
42.7314									16	14	0
32.3021									20	18	0
35.239									24	22	0
31.5203									28	26	2
28.7397									32	30	194
31.5287									36	34	227
40.1748									40	38	162
34.7615			27.6555						44	42	131
66.1637									48	46	92
41.9285									52	50	44
29.9999									56	54	35
31.6141									60	58	19
40.594									64	62	9
49.4049									68	66	10
30.7985									72	70	6
31.1535									76	74	1
46.7933									80	78	6
31.4324									84	82	2
36.5372									88	86	1
32.5945									92	90	2
37.8029									96	94	1
33.4038									100	98	0
35.8421									104	102	0
	6.43884								108	106	0
38.9819									112	110	1
31.9374									116	114	0
30.0105									120	118	0
34.7688									124	122	0
42.3584									128	126	0
38.5678									132	130	0
40.1778									136	134	0
68.6346									140	138	0
33.9997									144	142	0
34.3631									148	146	0
37.0775									152	150	0
28.0131									156	154	0
38.9453									160	158	0
31.9093									164	162	0
29.957									168	166	0
29.9866									172	170	0
34.4448									176	174	0
50.4861									180	178	0
52.1638									Total		945
32.4249
41.8908
39.0594
32.216
59.7304
	6.32856
39.0027
	6.62437
42.3876
54.6721
49.7448
31.3992
48.2518
34.1798
36.1025
34.7503
44.9599
32.7092
36.6993
45.3158
35.1062
30.4155
30.1155
44.1284
44.2509
30.3564
29.9422
48.2401
47.2428
43.6762
43.9847
54.4394
34.5737
	6.86916
36.8895
33.2003
50.5558
48.5148
32.5031
44.9482
43.7153
32.0351
30.9406
36.7258
37.516
31.7013
36.0623
42.2833
33.4133
30.8017
29.0015
33.2104
40.0647
48.191
33.3457
36.2995
33.9795
76.1787
42.8876
33.9204
31.2919
37.7617
33.6482
31.6494
28.5857
37.6881
30.0224
39.5264
36.4246
37.4092
28.0025
	6.91081
33.8345
39.907
31.337
34.0669
33.4838
31.6836
33.8134
31.9075
40.6719
42.882
37.9547
30.4634
40.3011
35.433
	6.19803
33.5609
36.0753
34.2624
	8.34898
33.432
31.8558
39.4074
43.3416
47.3984
40.9202
39.7708
34.759
40.3687
50.8066
35.3569
32.0269
33.2228
33.6961
38.4587
34.161
46.3567
36.3753
32.0847
43.5959
42.3873
46.3554
49.5628
30.7029
40.6759
45.3006
32.1667
32.4287
34.305
56.1779
29.8425
48.377
35.9742
33.5359
66.1301
38.7847
31.3938
33.4771
37.6691
45.2799
47.1899
38.2565
36.376
33.1264
	6.76359
28.816
31.4572
29.2808
67.3914
47.213
32.0338
31.1464
56.8564
42.2097
40.0671
40.4897
	6.22272
37.8739
30.0773
36.3806
34.0522
36.6426
30.887
42.2968
41.908
29.3277
41.3629
28.1064
39.5618
41.5099
	6.35963
47.6035
57.9061
33.1681
33.7893
88.7458
	6.5667
50.9039
	7.32312
47.7895
	8.09223
44.311
31.511
34.3085
91.0192
41.9615
30.2939
32.6435
36.4003
39.3076
36.4298
62.0131
37.3173
35.7495
32.9182
30.0784
31.0757
51.4324
29.9652
37.7492
59.8038
44.7471
32.5134
29.2679
41.9961
34.6854
36.642
45.3979
32.6613
39.5747
32.4457
46.3022
	6.42328
44.9669
33.4641
	7.64032
43.454
33.143
36.6413
39.3078
29.2798
47.5735
47.8904
31.6167
35.6609
30.2476
29.1489
33.5015
33.5395
33.4
43.1195
29.1573
37.6639
34.0025
45.7968
39.5426
	6.11543
32.7221
43.9797
48.0027
36.5972
32.7094
31.0064
29.2527
36.3648
40.7765
34.0363
34.5265
44.9263
36.1334
38.7196
28.9579
33.6105
45.1133
28.8945
29.558
39.6028
31.3413
33.8979
30.4707
36.5475
34.4811
34.1851
35.8755
57.947
30.7199
32.6047
50.2813
35.6304
27.783
28.5436
29.6762
33.8935
46.724
33.252
32.2336
53.1134
52.2725
33.9704
43.8631
28.846
33.4606
34.0226
29.0235
37.7371
	7.17434
41.0544
29.4122
30.9504
37.4751
34.5805
31.728
62.0284
33.204
32.1222
27.6555
45.0955
35.7733
35.9762
30.0896
43.1559
	10.1143
36.965
38.1651
29.2381
42.803
35.0908
46.3907
43.682
81.6717
29.9311
38.0574
36.8403
45.0638
33.4301
50.7771
32.824
37.1808
36.361
43.1604
62.0499
39.0318
34.8735
	6.28144
41.4997
30.6012
37.8359
52.8518
37.1739
77.7546
36.2865
55.5039
36.0143
28.805
28.9149
35.1776
40.2148
31.8645
29.7389
36.551
33.145
35.5625
38.0896
29.4562
32.2875
28.7547
49.2585
34.9075
56.6241
35.085
30.8361
31.2122
36.1437
	6.44221
30.5952
30.0712
31.4615
45.1405
30.329
38.3106
40.6982
36.6034
33.5819
36.9161
35.7709
39.1304
35.9442
36.0836
33.3791
30.6027
32.4249
53.554
34.0095
40.1412
43.6191
42.7443
	6.78584
33.0545
43.3993
31.5459
40.4666
43.4839
37.1324
42.1992
32.0783
42.3936
30.2232
31.6069
70.2607
37.3963
31.2604
42.3405
41.2925
53.3108
	9.62684
34.7974
42.256
	7.25192
33.386
82.4944
38.3175
31.028
38.3387
42.6956
41.0687
29.6843
	7.93511
39.2389
47.4201
34.0581
46.6046
41.711
35.6554
44.3945
36.116
30.4154
44.4409
56.1127
45.7636
43.7141
34.3844	6.30323
45.4518
38.8933
54.5712
38.8807
32.7512
33.3682
43.4384
29.8438
35.7135
37.987
33.7063
33.0512
45.8679
28.6181
33.1228
45.9482
37.3317
29.8478
31.8044
	6.77679
44.3044
95.9779
31.8593
61.0767
29.0491
37.019
34.9357
35.5992
47.254
47.4526
29.0856
51.5628
44.5268
32.0225
36.7977
38.4204
40.8165
33.341
29.5335
41.5349
49.3654
30.2139
35.0778
29.0771
	8.13872
29.4567
50.1886
29.4229
51.6043
	6.61523
39.8691
32.8035
31.8696
35.6029
36.6171
35.2564
50.7314
31.8968
63.8442
33.1815
37.1031
46.4591
31.2587
34.4281
45.7618
34.7493
30.7516
35.23
29.1617
55.8606
29.859
34.0003
44.1001
43.4577
43.6099
34.406
43.9479
36.8485
42.7182
47.2568
36.9664
29.3345
41.7711
34.2153
43.4742
33.6744
42.5572
31.384
32.5631
44.0235
39.5272
57.1997
33.0864
33.6527
43.9341
40.4309
	7.2183
55.6397
41.3268
47.3697
57.3723
39.4463
35.4012
49.6549
32.7389
37.8226
35.8491
	6.25293
37.3662
32.3839
31.095
32.8699
42.2555
36.4154
55.5077
35.7395
38.4314
31.3615
38.8159
35.338
30.4783
	8.1226
45.8899
30.4234
51.261
74.1988
30.9094
43.2403
37.5524
35.0803
	7.29814
31.198
60.4281
	8.78141
30.674
46.1786
51.4525
44.2728
31.8911
34.6511
31.5367
43.3352
33.9707
45.9172
32.0945
31.9719
86.6958
	6.2328
38.2895
29.859
33.4539
67.6579
46.0089
33.0314
34.8738
35.5246
36.9022
29.8535
44.7158
50.0699
32.9088
40.5129
44.1429
43.864
29.7159
33.3205
56.6344
35.1123
36.8871
34.8756
34.5671
76.3776
51.555
48.6054
38.0239
48.5486
32.1904
54.2281
40.1096
48.8824
30.5761
37.7178
30.0267
71.9767
36.4299
35.8595
35.5425
31.0462
58.3113
34.8453
37.4948
48.0637
35.4157
37.9217
28.2445
29.2671
56.7942
78.8531
52.6736
	7.0569
39.1087
30.0443
45.1559
31.1176
30.3866
31.3501
42.9624
32.7951
40.1015
52.2761
34.4474
28.996
40.1818
34.908
29.1608
28.51
32.5753
37.4456
34.3523
43.6322
30.0926
36.9258
33.2113
42.1025
39.9304
38.3288
52.984
41.3913
35.6653
30.8521
42.4013
33.32
40.6899
38.0107
31.5451
37.8797
54.0689
32.4622
36.0668
35.4374
47.6501
38.3237
48.7911
32.2892
48.6727
34.5458
36.1051
	6.79521
40.0056
30.1213
40.3106
43.1081
40.9445
37.2004
41.4473
54.0023
44.7666
30.7537
30.6988
43.2411
43.5158
55.1452
38.525
45.4047
38.7532
	6.84214
43.6425
46.1189
47.0427
34.4328
64.1242
36.0893
30.1055
67.8591
52.5954
34.9483
	6.16145
31.2972
37.1542
47.3469
34.0609
48.1479
38.4876
52.6991
43.8206
33.9998
36.8802
	8.04124
36.1322
31.7289
29.6752
38.3466
41.4272
53.9779
30.364
39.2551
47.684
35.3446
37.8928
40.2508
42.0806
32.4119
46.5346
38.0238
40.0691
32.0569
40.7283
32.3293
44.4448
29.1177
58.4366
35.5368
47.5381
39.471
31.7904
38.3785
52.8055
47.3669
71.9063
37.6052
35.6317
37.707
32.8262
32.9952
29.5976
40.3524
37.1492
30.2484
55.6726
109.951
34.4378
40.616
37.248
	6.66805
33.0686
32.4516
41.7971
34.7695
41.8901
36.8064
66.4084
34.4611
31.6002
34.0638
33.6201
31.2029
38.8982
31.7607
29.4619
41.2773
45.406
41.5943
62.0045
36.2649
29.5205
52.8513
35.1324
40.7781
65.6302
40.2668
40.8035
42.798
40.6175
41.0908
37.4186
35.8719
58.5604
40.9683
31.7728
41.3165
34.9482
51.0275
55.1477
54.1969
33.9213
34.2171
	6.32305
49.0981
69.7014
48.6882
62.6696
41.1155
52.1745
32.0849
28.9831
39.6534
48.1431
29.2451
38.2773
46.9276
29.1115
32.264
45.7697
39.5282
37.6519
30.3497
51.5549
37.018
42.0425
32.526
43.1666
32.864
50.1392
45.2373
66.8768
32.001
33.3744
31.5615
30.1416
35.5676
39.2103
46.1111
30.0022
30.0656
46.7872
78.683
37.1979
39.6067
46.9892
29.6168
36.8601
31.5651
29.0634
40.714
38.9899
34.5443
45.6752
37.3207
34.0581
56.7424
43.8662
30.538
	6.38987
45.0157
38.1698
35.6132
41.3392
29.9675
32.503
30.2464
58.8004
30.9521
34.9328
47.9727
51.4083
34.1753
38.511
35.6882
47.9558
47.2797
30.4862
33.0006
30.2834
40.1591
44.6174
55.9384
35.4177
33.3851
35.6164
46.4516
36.6223
41.8919
36.5969
35.7391
30.5455
58.0896
55.8752
30.1356
38.4479
29.73
50.5042
52.091
30.8351
56.1225
44.8775
65.8377
	7.43611
28.701
37.0471
46.4157
34.7575
	6.31264
30.7641
44.0586
33.4687
32.1122
	7.19162
30.4472
37.9142
37.0395
28.6554
60.5352
44.7651
68.2911
35.9458
40.8224
40.6787
31.31
30.4226
37.2769
41.938
79.3628
32.0876
29.776
30.3761
38.0713
31.4917
38.3038
45.7877
45.0651
34.4817
44.9195
33.7844
28.7514
	6.68681
29.5881
40.7486
30.3023
44.1419
33.328
44.6702
48.6365
55.1189
43.6289
42.9697
40.2609
48.8901
42.8682
32.2825
39.9271
47.9266

## Sheet: 690red
[28Si]+ (cts)	[29Si]+ (cts)	Average intensity (counts)	m/z	% abd	Average int (cts)	Abd corr			Size (nm) edge	Size (nm) center	Pb mass (fg)		Average intensity (counts), All	Average intensity (counts), No small
149.111		68.5296	28	0.9223	68.5296	74.303			0	0			68.4911	58.1221
46.1683			29	0.0467	7.19984	154.172			6	3	0
29.9791									12	9	0
65.9494									18	15	0
62.2265									24	21	0
72.0769									30	27	44
80.7568									36	33	126
32.8696									42	39	161
54.003									48	45	193
264.856									54	51	222
111.732									60	57	207
56.3399									66	63	223
96.6037									72	69	201
66.1481									78	75	180
104.367									84	81	123
29.3157									90	87	101
67.1707									96	93	79
68.0497									102	99	65
36.825									108	105	63
70.133									114	111	36
55.8455									120	117	45
78.5805									126	123	24
133.271									132	129	18
43.5736									138	135	14
75.2421									144	141	9
69.1399									150	147	4
52.9096									156	153	5
66.8042									162	159	7
77.8251									168	165	4
55.7747									174	171	3
64.9068									180	177	2
65.0589									186	183	2
69.1241									192	189	7
69.0438									198	195	2
44.3734									204	201	0
92.8438									210	207	1
53.0279									216	213	1
52.88									222	219	0
58.5469									228	225	0
82.2242									234	231	0
74.829									240	237	1
140.866									246	243	0
56.4847									252	249	1
53.6872									258	255	0
92.455									264	261	0
213.654									270	267	2
45.2693									Total		2176
93.7883
83.792
191.225
88.3982
50.3707
54.1486
110.238
106.79
53.016
116.763
54.7486
163.947
105.818
59.1858
65.926
115.613
109.98
94.3236
79.1528
69.9405
94.9025
62.2495
48.1099
57.3856
82.1743
82.6518
54.1148
105.94
31.3713
32.3813
66.5472
52.6066
33.9622
49.9739
44.0619
139.604
74.0062
79.8505
	6.65044
	7.05612
115.559
56.7986
55.9281
48.1399	6.77722
74.2344
	7.11528
36.1469
52.7207
74.3062
60.1243
49.4964
104.259
59.5243
50.1091
75.8266
42.4383
73.2404
29.896
53.4212
57.7147
132.709
66.0269
50.0871
99.8885
29.3044
98.4669
46.5289
73.3968
45.1132
63.0604
57.9767
44.6146
66.5467
70.2443
89.4338
49.1996
72.8449
69.0036
66.1131
48.5167
143.953
79.8978
162.952
71.4039
57.653
49.9535
157.15
96.4884
161.135
52.675
58.5742
92.3302
96.6913
49.2901
62.0479
64.6552
71.2982
34.8884
55.1851
52.8905
91.9583
78.7822
93.7965
52.1045
52.6581
101.868
	7.80404
60.6364
63.8523
44.2343
101.875
120.971
	6.45144
115.186
46.081
138.572
100.028
80.3694
96.6136
62.8534
66.8552
36.1249
76.3634
192.61
105.644
102.771
35.0896
85.5884
66.496
90.8284
37.6927
63.0351
37.2575
64.8987
49.9984
64.9494
85.0578
73.8086
56.4531
50.4905
40.1203
51.9906
43.0783
37.6735
135.709
59.1957
72.4522
75.4102
91.9755
61.9805
66.6416
43.801
62.5552
29.9022
70.0054
83.1531
84.5688
49.4563
85.9802
95.2094
67.2513
78.0061
32.7093
79.3583
96.6758
34.3194
117.636
56.767
113.241
52.0806
46.2235
69.6769
87.9706
68.5191
95.9912
97.3266
54.1597
32.553
64.4961
70.4896
76.762
37.4026
94.6623
50.8661
86.8956
52.5437
34.7656
59.3685
116.924
64.2662
103.452	8.01592
57.3189
35.1967
88.6789
91.9412
100.329	6.45658
63.8901
57.1288
42.5708
76.4493
57.4457
36.9504
88.5605
82.8427
46.1585
41.0283
90.2593
68.6061
66.2397
40.2846
38.6081
61.7665
28.876
30.6128
43.4467
48.5177
46.1132
46.3456
52.7646
99.7779
58.6597
78.6606
117.843
59.4499
87.7039
38.0122
107
47.3387
43.7509
47.9894
65.1128
50.504
55.6638
40.5184
111.943
87.0744
41.7101
83.4275
40.1085
75.2801
62.8731
77.9846
30.3426
76.6662
65.3536
	6.68516
33.9261
61.749
43.861
49.0884
36.7912
90.3923
59.0619
63.7484
116.791
87.1595
78.1204
33.9224
52.888
112.842
157.471
45.7632
54.0797
31.0954
58.3478
63.5413
64.4076
39.0019
84.0704
123.299
81.8983
46.0548
76.4597
70.4083
104.984
37.516
85.3948
122.219
62.6217
	8.67533
93.1661
134.625
96.851
55.0152
73.1948
105.15
100.413
76.2416
28.8573
29.2165
63.7711
53.8996
83.4086
104.179
38.0992
60.8976
44.1548
51.9853
44.5943
130.962
103.507
62.8076
55.7082
74.0399
81.5535
84.2073
32.8887
50.6629
42.5112
119.337
76.2672
41.0111
77.4631
29.5083
90.6942
37.622
62.4192
47.7302
125.743
33.3243
73.9895
54.0055
53.4984
50.0966
53.1308
89.3286
84.1949
60.3612
65.4618
79.9775
95.7665
38.6417
120.226
42.7407
126.695
63.4516
76.0192
62.7966
84.6906
57.7636
63.0924
61.3344
38.6163
70.3566
54.2435
93.2564
72.4695
68.1296
75.8248
52.718
53.4997
55.4183
117.214
86.7892
33.7972
51.1738
113.961
44.0744
92.8141
64.4514
63.1245
54.2714
94.9154
69.1759
86.6455
151.026
50.2821
60.5847
59.4438
45.7901
56.9336
50.9963
56.7012
93.6477
47.5058
67.8194
48.4566
81.1707
47.9556
60.9669
81.551
28.6858
32.189
42.1239
	8.00377
38.7095
81.3059
69.4228
	7.24312
74.2783
70.5427
93.3537
69.2834
81.1791
83.8118
37.5178
34.2554
41.1731
71.4935
70.9244	7.47923
74.4023
50.5474
46.4145
87.1812
76.9335
102.652
54.9296
50.1459
53.5477
38.4023
48.5105
107.313
30.7916
31.1297
39.5264
72.1118
55.6987
90.4943
39.3025
36.019
46.8794
52.2631
78.2224
51.6317
110.434
48.1327
49.7132
52.722
	6.75191
35.2735
41.5277
56.6436
113.097
75.3429
77.7305
100.111
50.7147
82.6832
70.0521
96.8233
108.153
57.831
53.901
77.0168
88.7895
65.1628
69.6211
58.0719
47.1531
47.7151
56.5978
64.4072
151.541
61.4829
78.4665
49.266
102.093
51.5352
44.626
88.1563
52.2663
187.993
60.494
31.9062
57.1725
57.3669
49.9801
53.3566
34.1671
73.1462
69.6303
	6.68713
64.4494
47.5545
102.585
77.5005
99.7622
77.8216
37.8452
38.4791
105.932
69.0741
42.1598
34.8195
61.755
34.6378
58.0743
68.2163
31.3712
83.1504
113.158
78.9246
50.7847
68.3008
76.2792
79.8712
61.0239
46.7829
66.4964
42.7387
47.4548
37.3635
41.784
29.5671
73.2116
50.0962
65.2416
88.4795
101.558
71.1071
137.389
59.934
131.945
43.7702
53.9037
60.4199
125.371
80.8645
104.005
51.926
40.9431
52.9233
114.095
75.1005
32.2125
53.2276
90.6431
29.2502
58.7296
96.9185
72.8693
32.0688
45.3591
105.298
34.1902
116.378
45.6533
74.9975
104.625
48.5269
34.0069
30.1234
42.0614
86.8425
37.0453
54.0331
38.5581
86.3946
43.7517
83.0689
55.715
127.426
47.4028
84.4
92.5643
72.9522
61.6481
29.534
72.122
42.7862
40.4493
57.6696
96.5177
61.8405
30.1298
37.6307
40.0605
126.754
65.255
59.8966
108.359
74.5265
62.2884
136.426
107.146
72.815
47.6459
107.307
51.0481
62.5128
73.5338
39.9045
72.9886
55.65
108.266
67.943
80.8276
67.6302
27.7722
74.8987
64.9426
50.748
51.7157
59.4913
27.5059
64.4693
51.0565
71.5392
62.8255
64.6003
63.696
56.3177
43.8219
32.0952
58.9208
74.6874
53.8415
35.3619
119.033
61.3592
78.7021
73.6902
56.7869
	7.4734
48.3606
57.2771
98.6438
74.92
40.8977
45.9307
62.6439
47.8281
66.6585
29.0696
58.4181
43.1797
72.1938
39.676
38.9027
38.459
69.5696
54.5171
53.9424
82.0907
55.2862
41.024
40.3606
103.947
120.149
71.7205
50.9294
97.4724
30.3031
87.1533
27.5774
146.463
36.3545
74.8603
33.7627
29.8876
103.337
55.8596
49.8969
63.8084
58.9402
39.2605
44.2766
68.0849
60.546
105.796
66.141
107.326
81.0498
57.9556
94.0611
74.5423
137.392
32.2502
32.9136
51.0467
44.6952
28.0159
120.591
32.0389
79.7514
36.8098
72.1505
30.8514
34.7857
28.7765
66.9274
69.0614
	6.79847
78.8992
100.912
116.644
	7.63941
66.5893
52.2553
48.4689
90.5118
97.4717
71.6941
60.1787
61.4821
48.3989
107.544
66.0756
108.909
42.0982
54.4545
77.7727
133.448
156.424
59.8171
94.4521
137.34
49.6033
29.6277
62.4414
64.643
157.667
53.1065
82.1337
73.6609
84.2805
48.4333
108.58
76.8647
59.7205
63.0885
84.8304
52.3506
49.7137
73.2093
81.1962
69.4779
94.702
37.1968
44.9089
86.7489
43.1763
136.547
31.4327
67.0481
87.3448
47.905
50.7363
39.9393
66.826
65.4441
75.0199
70.0376
30.5894
34.0123
105.606
49.462
63.627
29.3428
59.2237
34.3589
128.223
31.5445
47.3491
55.0063
56.5149
28.9118
63.9439
68.0219
43.1993
48.9929
46.4025
54.8161
116.775
105.48
101.793
86.6861
97.4958
73.0705
	7.79679
73.0451
50.7538
69.9829
42.1754
45.3194
59.1083
61.2212
69.6771
56.9996
97.3901
119.922
95.2872
84.2393
107.972
65.3499
53.8556
50.2383
64.923
43.8236
34.5098
75.7836
35.1099
61.4918
72.6396
43.5109
60.9932
	6.48675
66.9643
87.8061
61.7792
33.4492
48.5227
31.9194
55.0685
32.4223
90.1388
34.2374
103.985
45.4655
187.483
29.3608
101.411
34.2417
54.0271
	6.90866
95.2543
84.1108
83.2442
54.7412
42.6511
39.5831
65.5763
70.3937
81.5541
86.3631
49.3617
47.0375
78.3299
87.3182
82.5557
87.5295
42.368
64.3846
113.311
94.8022
70.2712
116.645
31.7992
94.6796
51.8423
67.3511
38.3619
64.0888
78.389
59.6136
56.233
30.7005
59.0516
80.4132
64.1437
68.1836
105.629
43.8174
38.2224
91.1679
68.7161
50.6253
75.6465
90.2636
	6.94194
124.21
58.895
30.9918
39.3252
63.0913
99.6743
53.038
50.0715
37.5968
60.3572
39.2871
31.1397
44.0328
38.742
111.519
55.3369
102.324
40.7831
49.5855
86.7179
51.1533
90.2381
37.3475
97.6925
70.4025
69.3461
55.9713
62.8467
31.322
47.9
38.6073
76.83
78.9218
68.1417
48.0732
58.8744
73.0268
41.4725
103.149
81.7447
54.0232
68.9404
61.617
41.9796
82.8983
99.7891
59.3157
76.3543
55.3096
85.4779
44.5802
38.0725
75.6824
118.828
71.4669
159.804
73.8737
88.5712
105.868
73.8315
85.2413
31.7253
60.3511
66.0517
40.8657
153.583
71.4819
53.0995
76.5529
44.0504
80.249
32.6618
61.3848
58.8451
94.5745
123.589
85.0748
45.4999
76.4837
96.4677
41.9375
46.045
57.3491
84.9227
72.9763
41.236
92.5208
61.8919
105.002
32.1992
58.1796
189.796
86.8561
72.3446
70.4853
79.4398
53.2312
38.9267
51.2028
62.2406
71.0431
118.368
181.991
43.5329
61.6194
39.4338
29.6932
62.5703
67.5314
107.406
47.6953
205.999
131.082
51.5554
91.7727
115.264
73.8678
101.12
58.9422
50.7821
36.3973
61.2453
32.4208
61.3002
62.0609
56.1489
92.0178
72.4353
98.2044
78.3345
82.6322
32.8096
41.8022
42.005
82.6956
62.1116
126.644
59.7958
39.5583
82.5097
86.7693
54.822
82.5604
35.7761
52.1512
90.2514
68.3381
50.2727
51.9376
51.6756
43.6043
44.7495
54.4097
62.5572
88.9221
124.115
36.6908
28.6744
50.7797
72.471
47.4625
47.678
67.8268
107.44
50.7882
48.7809
49.0852
57.7989
34.992
49.2331
59.1765
68.4564
37.033
59.9455
106.117	7.18724
60.4357
28.6574
41.3307
57.2029
85.7654
98.1513
83.2721
43.1225
81.5691
58.0185
28.5011
43.0295
57.334
79.5407
74.4739
44.6776
63.8248
56.0535
44.9438
73.4006
74.5796
75.7696
54.1755
39.7358
42.1403
46.7888
61.7482
40.7205
65.0401
53.5036
59.9396
56.4194
58.9127
32.8984
55.3249
110.565
93.8181
64.6852
54.0783
67.6982
104.649
104.374
72.3339
64.4866
39.3344
68.2658
83.4281
60.0254
52.6007
74.1947
63.385
43.7137
93.6251
119.12
59.3916
61.7961
39.8513
61.1495
37.7849
76.0794	6.61282
60.4692
97.2846
64.1372
104.616
79.8742
32.1265
77.9979
47.2913
192.871
63.7003
71.349
89.3215
45.1742
67.3176
141.46
70.5461
163.84
187.8
80.6374
62.1367
49.7339
63.0326
90.3822
75.5199
120.441
59.7195
65.4413
54.957
55.2095
35.7242
55.163
58.4296
38.6484
110.838
88.0527
88.3781
70.8113
84.6889
62.4019
74.1877
105.974
73.2707
75.9541
77.3613
116.26
48.1946
65.8121
90.4741
170.324
59.7861
63.3273
80.5814
56.1744
111.288
80.4644
49.0369
53.9431
46.1971
53.9516
67.3432
31.8082
85.6495
74.6877
85.0537
65.9445
68.2602
51.1879
62.5807
33.376
41.9459
63.2738
86.6553
68.3447
53.3177
64.757
101.349
78.1825
45.9436
81.3223
117.077
63.4512
63.9499
118.628
57.1294
100.802
85.6424
33.3012
57.904
88.3089
42.3825
51.0412
67.129
60.5324
73.9072
44.9898
188.892
65.24
61.6523
30.8755
66.7191
30.9009
64.9865
72.2253
72.3944
41.4359
56.0404	7.29083
89.158
78.9399
68.5655	8.61408
29.9076
87.8903
61.0097
69.6981
56.7036
78.8948
59.649
48.2688
118.567
81.2853
69.8544
92.881
144.609
76.1509
58.0854
43.1471
123.949
54.392
74.3
61.3731
45.0952
53.8807
60.6904
112.16
45.2618
57.69
70.2492
51.9091
44.4547
37.3257
42.3798
49.3694
53.5487
71.7102
93.9731
57.1702
102.442
44.5772
105.645
60.103
	6.76441
	6.93345
123.909
42.9038
68.5124
65.1359
84.8626
60.5254
72.7218
44.827
39.98
41.2182
73.0683
78.6506
59.4358
96.8845
52.2899
74.4502
94.3285
64.3124
103.997
68.4283
41.6408
48.0006
46.8301
44.172
64.5152
67.8578
58.654
103.025
66.2436
72.2654
106.558
60.4626
40.7787
62.2628
96.3182
	6.92609
72.8316
76.4828
49.7501
29.7619
62.7361
66.6366
38.5981
32.5636
38.1037
59.9386
73.7191
102.045
28.473
116.556
47.6541
35.3485
62.1783
50.3037
70.6131
54.2961
31.6372
152.91
41.1749
56.185
143.996
75.5943
60.5334
42.8736
87.6506
126.266
59.7897
37.4477
68.9471
51.0295
27.7494
46.8459
100.235
63.1281
100.446
85.5022
30.8748
48.3402
66.393
45.4328
88.8913
39.2082
141.997
30.355
183.297
66.862
68.4053
60.536
45.4962
92.2847
61.3008
69.3637
51.8054
59.5302
86.7573
61.9263
64.373
46.2228
75.8078
53.3095
67.8041
55.9506
39.3516
66.287
93.3704
66.3758
63.1134
79.0575
39.491
39.9516
49.2485
79.5435
71.1552
33.7481
57.6072
83.9764
130.465
48.0399
85.1385
120.416
38.7602
58.8118
53.0435
53.969
60.3796
131.036
81.6482
60.8698
72.2077
76.3279
35.8655
48.057
282.528
40.7759
72.7021
94.4482
80.3305
35.519
67.6269
45.0355
46.7132
37.0529
	7.02146
84.8514
66.4733
43.6834
58.1653
108.753
73.2769
77.7267
78.6944
	6.98102
50.5292
66.5916
55.9848
100.039
49.1431
78.0943
50.0644
33.5413
64.3223
66.6761
115.561
63.0461
65.6831
78.4197
75.1912
119.52
69.9174
35.2613
75.0137
53.4577
54.624
42.1916
38.7204
67.6927
59.651
83.6115
45.2197
60.7032
52.8136
42.9758
39.2022
67.959
37.5499
34.2706
79.4955
41.9405
74.0822
110.424
85.6737
42.8364
39.7177
46.741
87.6936
48.106
43.5421
250.269
29.5165
73.592
61.4385
115.152
106.984
	8.20284
67.2144
91.6693
83.5303
46.5711
45.9964
86.7673
65.1352
30.0566
62.5828
72.0571
45.7894
80.9525
137.017
63.5041
73.0545
117.607
32.2723
168.78
109.208
74.5307
59.005
45.964
95.6726
64.8873
67.5538
76.3436
104.226
96.6614
51.6647
83.2866
65.2043
66.3241
63.2646
124.924
86.8659
68.2384
57.0273
112.779
32.5132
45.5753
55.7912
99.1229
68.1771
59.5606
60.7607
60.7142
107.063
81.1208
30.6897
72.7875
45.6745
61.0777
71.6634
48.5016
114.308
124.237
41.2881
42.746
43.9673
75.9568
68.6335
113.14
87.6371
67.7629
53.5007
78.3123
	6.53413
95.8436
44.7039
45.7561
55.615
51.1737
56.2827
64.3106
43.7362
127.551
68.994
45.4688
53.7345
49.0227
131.659
118.145
74.4961
55.4798
101.486
75.0835
39.4089
31.308
48.6128
74.8257
64.9076
76.0089
56.887
54.5839
66.6741
111.016
236.698
72.4864
67.6351
52.9588
120.268
73.1667
80.9381
35.6117
84.1461
75.5332
122.322
53.5842
91.6675
71.8948
84.8174
64.4657
50.998
86.1654
41.3039
83.4693
61.9302
47.5455
41.9378
44.6508
95.0059
49.2147
31.9648
66.1476
89.6221
79.3111
65.032
47.5793
52.4813
101.602
59.7835
37.3054
92.5625
46.7671
42.7906
66.2778
50.3421
34.4361
59.1615
47.5193
51.1577
93.5091
62.0815
61.511
33.1979
61.2786
68.3527
80.4555
60.9617
70.2036
84.6768
67.947
	6.91328
71.4119
57.5511
28.4985
62.7827
52.9999	8.26977
46.6992
89.2407
173.634
65.7112
52.0533
72.6585
56.8369
49.2981
37.4657
104.555
44.2648
62.1443
72.0116
93.8296	6.83694
	6.59184
35.7413
64.1854
55.4717
76.8079
63.5008
81.9077
74.0738
28.3334
91.4167
33.8565
68.4281
67.7224
77.8855
32.0479
38.4162
62.2668
32.0141
	6.57916
99.8683
48.9893
80.8732
39.5783
99.0992
68.3436
33.6392
113.617
31.5812
81.5813
131.345
57.8659
90.8951
69.7744
38.2327
51.7216
40.3372
69.2461
77.1062
41.8542
65.8501
87.0369
68.4474
97.5861
62.1355
54.0515
56.0123
50.5187
29.1825
89.7176
47.1507
69.404
82.8421
61.3073
32.4448
50.9582
41.8769
106.853
85.8636
84.4141
29.9896
52.5556
47.4465
73.4016
37.7651
60.7157
84.0169
85.0945
67.5605
57.4734
51.6713
67.7971
71.1186
42.7125
58.8975
71.5919
59.0538
74.4274
70.9918
45.9875
84.3686
58.0523
58.2594
38.7191
70.1213
80.7366
35.5117
44.8297
82.1058
95.3495
63.3515
67.1674
54.8069
42.5266
54.0758
40.4517
98.1935
61.5893
49.6175
56.6139
188.867
97.3932
117.314
53.4234
68.0448
107.117
166.951
67.842
69.9
100.922
63.6162
96.4678
95.4494
142.25
97.7229
70.2761
42.9264
46.9494
	6.57783
28.7445
39.1232
70.4831
59.2551
53.6728
69.7563
30.5837
56.974
77.2411
76.7425
80.3556
58.1192
49.7351
47.0179
49.5661
41.0341
72.0771
50.5127
73.0026
67.2428
115.341
58.6897
67.8767
46.3714
87.6705
56.2091
53.6821
76.6199
115.595
107.749
46.5953
56.2429
71.4475
51.996
32.7938
83.4573
37.0492
60.6124
111.973
	7.71833
53.8553
65.2651
60.7434
49.6802
65.7553
52.7777
78.0989
35.7814
73.5054
37.5647
52.1227
151.364
75.8804
67.9654
45.3191
108.626
77.8792
92.7879
54.8949
34.0699
47.9391
132.398
61.4111
113.659
54.4723
91.0765
42.1309
135.918
39.1686
115.479
68.4325
77.0912
85.1753
31.9424
38.4586
66.8943
48.457
87.7868
54.5675
76.1616
88.1418
82.0862
58.2863
37.7315
44.6872
66.9024
65.846
74.978
47.4213
66.67
57.6985
115.947
81.6126
43.3856
76.6852
54.8208
91.3869
35.5509
75.9964
68.7829
133.13
	7.38069
81.4858
45.5028
39.8655
51.0767
68.6477
67.3926
72.3411
33.4398
30.3042
73.5853
90.9492
50.4361
54.0408
49.329
50.9179
71.5104
81.8679
113.372
69.5581
36.0133
61.9515
76.0996
75.7489
50.6094
56.4326
56.2171
62.4629
44.7313
78.4365
48.881
45.0947
79.5352
66.0929
66.3253
77.4815
97.5077
68.4901
27.6939
36.4667
54.5998
66.7786
31.0534
71.1651
100.264
41.5504
73.2949
48.3878
56.4169
74.2541
87.0965
57.3804
74.5964
43.9338
87.4556
30.3097
118.925
39.7375
55.2336
64.129
31.8141
67.9027
64.2093
47.8258
62.7092
26.5106
39.7967
70.7002
60.8621
89.5936
43.3672
39.4202
38.1694
40.2527
47.3437
125.096
45.6702
68.8109
41.9008
62.3074
65.0668
98.5355
72.1451
33.7238
81.742
126.768
73.3072	6.34422
65.5591
52.3491
69.8272
77.0491
32.6145
55.5481
73.6558
131.043
39.5322
36.4896
47.2781
79.741
68.2679
36.2825
65.0943
73.1402
60.9233
63.3532
76.8421
87.5377
39.9928
78.0103
90.6329
108.611
[truncated: 211 more rows]

## Sheet: 730red
[28Si]+ (cts)	[28Si]+ (cts) no small particles	[29Si]+ (cts)	Average intensity (counts)	m/z	% abd	Average int (cts)	Abd corr			Size (nm) edge	Size (nm) center	Pb mass (fg)		Average intensity (counts), All	Average intensity (counts), No small		Low end cut-off
209.627	209.627		94.3046	28	0.9223	99.4705	107.85			0	0			94.3046	99.5087		45
58.1944	58.1944			29	0.0467	7.19956	154.166			6	3	0
60.2862	60.2862									12	9	0
28.7149										18	15	0
54.3784	54.3784									24	21	0
51.1499	51.1499									30	27	40
93.4632	93.4632									36	33	52
126.809	126.809									42	39	32
123.931	123.931									48	45	53
100.554	100.554									54	51	69
92.4617	92.4617									60	57	76
88.5908	88.5908									66	63	96
52.8318	52.8318									72	69	118
58.786	58.786									78	75	115
55.9251	55.9251									84	81	145
87.6146	87.6146									90	87	139
73.9072	73.9072									96	93	139
97.6521	97.6521									102	99	105
110.169	110.169									108	105	122
72.0774	72.0774									114	111	103
92.1205	92.1205									120	117	80
57.6631	57.6631									126	123	55
177.85	177.85									132	129	42
37.5523										138	135	50
85.8621	85.8621									144	141	43
93.215	93.215									150	147	26
125.775	125.775									156	153	22
111.407	111.407									162	159	15
185.828	185.828									168	165	16
101.717	101.717									174	171	18
90.557	90.557									180	177	11
105.157	105.157									186	183	12
77.4653	77.4653									192	189	3
66.5071	66.5071									198	195	9
50.3982	50.3982									204	201	5
83.4062	83.4062									210	207	7
113.997	113.997									216	213	4
114.403	114.403									222	219	4
109.94	109.94									228	225	5
79.9157	79.9157									234	231	2
80.1439	80.1439									240	237	2
106.458	106.458									246	243	2
32.168										252	249	2
98.1967	98.1967									258	255	0
52.6168	52.6168									264	261	2
217.569	217.569									270	267	5
137.417	137.417									Total		1754
105.258	105.258
30.4058
101.256	101.256
190.718	190.718
139.728	139.728
85.5192	85.5192
49.5277	49.5277
119.858	119.858
105.799	105.799
130.862	130.862
131.061	131.061
89.0749	89.0749
68.2064	68.2064
74.1268	74.1268
120.826	120.826
88.5834	88.5834
133.884	133.884
		7.34685
87.0747	87.0747
78.3991	78.3991
100.141	100.141
69.1192	69.1192
72.3562	72.3562
174.757	174.757
73.7042	73.7042
64.42	64.42
76.8567	76.8567
72.9351	72.9351
31.0993
70.5559	70.5559
79.2781	79.2781
65.8991	65.8991
60.1942	60.1942
94.4375	94.4375
92.8145	92.8145
39.8902
78.7932	78.7932
84.3629	84.3629
38.6689
85.3644	85.3644
121.516	121.516
126.017	126.017
183.512	183.512
92.3075	92.3075
67.0919	67.0919
58.6149	58.6149
176.51	176.51
111.59	111.59
163.957	163.957
91.6229	91.6229
98.6504	98.6504
85.1827	85.1827
82.1739	82.1739
114.797	114.797
113.299	113.299
63.9115	63.9115
48.576	48.576
125.981	125.981
53.9808	53.9808
45.2925	45.2925
50.1776	50.1776
218.886	218.886
98.6733	98.6733
85.5225	85.5225
86.9128	86.9128
82.1503	82.1503
97.7689	97.7689
54.9654	54.9654
76.4876	76.4876
32.298
111.013	111.013
125.993	125.993
169.88	169.88
84.5646	84.5646
63.2368	63.2368
138.643	138.643
109.784	109.784
112.806	112.806
152.292	152.292
127.723	127.723
114.331	114.331
69.884	69.884
		6.74653
123.924	123.924
115.333	115.333
119.555	119.555
179.557	179.557
78.1117	78.1117
89.3947	89.3947
90.9667	90.9667
110.638	110.638
137.316	137.316
86.1577	86.1577
96.6209	96.6209
176.337	176.337
84.0025	84.0025
129.025	129.025
251.417	251.417
112.472	112.472
38.8622
89.6229	89.6229
116.356	116.356
109.065	109.065
57.6745	57.6745
74.5102	74.5102
82.0829	82.0829
121.1	121.1
51.64	51.64
153.267	153.267
67.7193	67.7193
96.81	96.81
102.849	102.849
60.6241	60.6241
196.011	196.011
86.4059	86.4059
112.695	112.695
106.897	106.897
89.7655	89.7655
135.071	135.071
158.431	158.431
76.7938	76.7938
89.3699	89.3699
94.0943	94.0943
65.2826	65.2826
93.9338	93.9338
200.435	200.435
64.1247	64.1247
111.37	111.37
135.584	135.584
45.0324	45.0324
89.7206	89.7206
66.1573	66.1573
79.1645	79.1645
81.2816	81.2816
101.671	101.671
44.2295
92.5435	92.5435
79.6251	79.6251
167.345	167.345
67.7082	67.7082
131.37	131.37
59.0495	59.0495
102.09	102.09
95.8776	95.8776
106.823	106.823
79.2236	79.2236
58.8889	58.8889
102.736	102.736
137.959	137.959
162.143	162.143
92.8308	92.8308
74.0082	74.0082
193.549	193.549
148.514	148.514
50.0139	50.0139
110.988	110.988
103.805	103.805
118.139	118.139
170.404	170.404
82.0246	82.0246
79.8906	79.8906
80.4526	80.4526
52.8114	52.8114
113.042	113.042
69.3428	69.3428
102.347	102.347
127.208	127.208
63.9126	63.9126
100.331	100.331
80.6469	80.6469
96.7432	96.7432
32.2062
91.9215	91.9215
142.467	142.467
50.5282	50.5282
100.182	100.182
89.6045	89.6045
86.2323	86.2323
93.2472	93.2472
166.003	166.003
81.9854	81.9854
37.7577
112.158	112.158
112.547	112.547
80.3669	80.3669	7.12111
92.3512	92.3512
201.12	201.12
129.412	129.412
89.8285	89.8285
54.6315	54.6315
161.68	161.68
111.748	111.748
47.2964	47.2964
57.0792	57.0792
116.913	116.913
91.0845	91.0845
102.486	102.486
197.885	197.885
97.3092	97.3092
50.1404	50.1404
		6.57363
45.0694	45.0694
64.6857	64.6857
82.5398	82.5398
87.8602	87.8602
74.3291	74.3291
33.7119
88.4407	88.4407
66.9312	66.9312
66.5002	66.5002
57.6682	57.6682
79.2284	79.2284
57.14	57.14
73.3418	73.3418
79.52	79.52
50.8055	50.8055
117.789	117.789
55.5046	55.5046
95.2317	95.2317
30.8468
155.378	155.378
73.5785	73.5785
61.3193	61.3193
70.5739	70.5739
117.641
69.3526
112.532
103.806
106.418
106.73
116.855
92.0117
181.498
87.2153
117.844
125.599
107.842
29.5242
		7.05781
104.461
53.1044
105.856
130.091
248.903
79.9258
119.978
30.8723
121.064
57.1517
180.339
173.616
95.3279
117.999
104.646
38.1861
78.5766
270.672
162.776
58.1194
69.9602
142.573
108.2
47.6013
113.44
108.639
236.455
84.4125
68.8107
243.989
68.7896
72.6985
83.2177
81.2612
65.5706
56.9795
64.9452
42.1764
106.063
119.273
90.5664
145.692
78.4467
98.9632
81.2569
81.6922
83.8558
119.784
153.65
58.5135
51.9592
78.9623
32.981
		6.66044
93.5541
84.4939
210.697
85.394
116.547
106.456
94.0739
64.9917
115.666
172.769
55.2405
115.383
85.0073
		7.2033
91.7771
68.8096
126.104
65.9234
77.5487
124.375
78.6009
64.6134
65.7713
58.0422
90.615
69.5999
96.2649
70.369
53.191
80.9632
172.575
124.27
95.6861
70.1324
83.7481
63.0077
142.098
29.894
82.3367
		6.34488
92.3181
46.117
79.3786
80.5238
111.998
28.0431
65.1079
74.7006
114.073
82.0577
46.7042
80.5067
125.541
108.625
42.4742
84.7452
68.3405
74.9962
175.516
67.47
56.4828
104.704
108.727
134.551
28.774
68.2476
30.8447
142.364
55.4388
47.5998
94.6545
83.4096
67.1528
83.1856
31.5543
101.847
107.273
107.979
29.7499
		7.80304
121.531
37.6057
111.638
42.3767
101.006
98.6944
104.584
70.4853
105.179
81.4767
89.9917
50.4675
85.1997
97.725
165.93
58.7374
70.4642
112.19
86.5181
67.7596
139.992
108.738
175.834
155.353
52.2846
30.5814
91.7124
46.6607
159.529
94.2775
123.726
78.9292
106.98
219.759
97.675
81.1943
233.928
82.8677
139.359
93.9387
102.171
		7.27327
55.5597
150.311
134.769
28.1805
60.9434
34.3164
42.337
174.3
		6.85913
79.499
66.1285
71.181
83.6235
95.6967
59.8151
88.5128
82.4952
103.295
		7.4254
149.23
91.2257
94.4543
86.6979
68.9114
97.7781
107.514
60.1935
98.0401
114.5
94.7101
156.635
		6.57175
78.8083
101.915
52.4053
133.427
76.3066
197.166
34.606
109.036
95.0059
135.185
140.193
138.66
99.0627
65.1462
76.6827
81.6692
138.672
83.6866
182.476
37.2404
80.2087
62.6715
119.729
72.2557
124.483
73.7093
105.864
143.524
59.4894
101.072
150.159
76.5069
104.397
52.521
117.307
168.768
119.348
137.756
115.651
65.8789
117.775
102.249
84.3485
74.5107
84.3358
137.353
79.6155
117.576
141.444
120.433
107.76
101.057
64.8293
106.581
206.555
36.5796
99.9376
93.215
67.7367
84.004
119.598
88.0566
99.9777
67.4345
184.604
65.7442
103.46
83.7547
99.2889
67.0627
141.015
67.1134
83.011
118.373
85.8972
112.288
29.7443
107.035
53.8062
148.824
140.765
159.672
107.965
132.652
84.7985
103.849
58.7504
51.7313
167.236
124.606
109.219
86.6915
58.4672
130.467
114.971
90.3553
57.4656
81.0247
29.5244
82.5629
75.0451
41.8892
99.5719
73.2745
102.593
71.0855
106.663
162.22
119.328
74.052
98.2449
94.7079
114.709
87.4818
91.9104
101.304
137.782
131.528
105.277
76.6385
98.8748
64.6836
101.554
107.707
102.915
84.2268
75.3792
70.1899
158.434
129.715
41.7119
78.9838
101.727
96.7408
71.2675
111.453
87.8521
102.643
		10.0133
70.8896
149.013
148.159
29.8947
32.8571
60.0757
105.457
103.809
111.846
146.042
75.5803
83.6727
90.4721
38.7864
66.2712
69.0096
110.672
54.9122
99.2285
111.902
97.7537
91.2755
91.9939
28.7416
40.519
45.5815
140.878
81.3786
102.635
118.384
83.8384
43.6802
65.2404
92.776
96.6342
79.5491
98.4809
102.398
91.8716
52.0601
83.327
65.3503
61.8429
		7.32013
108.306
93.3676
85.8794
87.0711
135.199
136.118
97.1751
90.0672
49.2836
47.6229
49.7104
78.7631
123.946
137.012
44.3774
38.5204
60.1736
99.0048
56.7465
48.5314
74.4147
85.6132
63.381
114.26
28.8264
118.346
86.0949
66.4405
		6.18238
75.2979
87.6373
86.8273
53.963
71.4326
68.8548
93.2421
68.4111
76.8712
142.118
112.52
111.692
70.3085
193.013
128.029
110.369
95.0677
101.187
87.8743
83.8779
94.0453
61.3669
28.3927
65.9604
47.54
82.5722
145.3
84.9428
111.992
88.8053
120.989
75.4178
90.2843
218.572
130.417
70.0172
94.6834
79.3563
97.819
38.653
38.0276
109.968
33.7637
51.2122
85.7457
62.8205
110.733
		8.01579
120
95.8666
329.339
92.9127
47.0032
75.0797
97.4344
88.9742
194.171
143.672
34.2356
75.6488
88.2671
99.474
108.724
101.511
143.279
102.474
52.3602
57.8369
83.1919
127.546
85.833
87.2402
		6.84932
61.1119
135.427
96.7504
141.31
76.5911
76.5827
90.773
90.1814
121.072
174.586
73.0879
145.97
144.725
87.1181
88.5972
114.345
49.9096
86.18
130.602
61.5645
124.741
258.394
88.8
90.1565
84.908
105.564
32.0935
51.8575
148.76
82.2582
138.859
68.9172
90.7775
91.9291
121.415
83.0442
129.579
153.941
30.2677
118.216
140.647
62.084
65.8239
89.9116
123.245
44.2641
44.2218
67.1428
83.3066
68.6979
90.8624
74.4957
65.9384
79.3935
41.3525
131.088
66.23
160.521
		9.17858
321.38
90.9089
30.3484
84.0673
125.392
100.857
69.7797
150.662
65.1017
68.9261
111.645
77.1073
74.2548
103.045
70.6882
53.2439
44.4035
68.0301
77.4749
30.4202
66.4708
113.055
88.9945
115.913
		7.10105
107.27
85.4406
54.6934
28.1763
75.2901
37.8619
83.1121
136.784
148.136
94.6288
81.9808
109.132
107.712
62.1194
95.7444
85.2981
76.0435
80.1468
67.651
71.9276
100.038
55.3707
33.1724
90.0987
125.196
148.165
74.8087
105.454
78.6668
154.084
60.4493
60.3436
92.9079
96.2886
111.827
104.554
64.3117
85.762
66.4204
44.4671
82.5969
88.4623
102.539
38.6904
113.052
70.3884
123.494
98.7818
119.67
86.8523
107.517
101.081
123.283
29.4316
70.5575
223.612
60.7916
106.514
113.195
84.7972
63.5455
53.4964
94.0476
63.5751
29.1091
140.95
86.9482
143.972
120.679		8.22444
72.162
109.325
126.41
		7.44933
81.2231
76.2578
69.5598
52.2677
126.495
76.7902
59.5277
142.853
75.9155
29.5792
51.824
50.8182
94.1711
85.4067
83.915
86.1462
119.006
131.87
75.8215
68.3375
58.8759
47.2084
86.32
180.29
72.1746
119.073
50.8257
82.5702
29.5951
107.532
124.296
51.7132
88.8837
91.8756
151.887
103.619
126.553
199.93
73.1763
110.812
43.456
60.4142
62.1046
73.5777
80.4362
79.2699
82.0719
100.019
62.8063
82.41
112.27
43.4562
170.658
94.6226
93.8324
110.592
59.7088
138.762
93.0845
108.627
84.4595
50.4035
113.829
104.672		6.72267
82.7481
72.9695
96.5835
81.1611
113.478
71.0003
85.6135
51.0039
97.3044
121.119
48.7599
68.7524
103.193
96.9598
100.843
106.776
29.9254
148.697
47.7415
30.162
44.1369
80.6016
68.0929
70.2904
76.7263
193.685
31.9409
77.1996
68.5578
57.841
70.5693
29.5617
120.865
70.6135
133.665
111.074
110.089
104.055
90.0673
73.071
76.9925
95.1782
73.8969
30.4468
90.2255
111.951
52.2225
137.783
113.561
35.8348
97.7894
72.4347
109.677
61.7687
116.117
62.3223
75.9929
50.1815
64.993
107.226
105.193
92.6951
31.3655
130.161
59.4039
54.8527
121.11
96.8575
65.7554
		6.92182
47.2589
85.5408
150.513
36.8507
81.9488
127.677
67.3443
116.127
101.514
42.3062
36.3943
49.3331
73.2175
47.4188
51.2051
		7.07727
28.6307
110.802
41.4815
44.4015
71.6708
114.474		6.58285
60.3921
46.8314
63.0248
67.3394
133.605
55.5028
108.795
87.9107
168.443
67.3374
102.044
164.395
165.439
53.1639
41.3738
129.897
94.9279
101.761
71.9224
112.495
55.2937
155.573
100.261
65.2329
		6.77656
113.036
		6.32017
87.7651
75.265
166.97
106.376
154.987
121.227
79.7417
373.074
120.158
82.1588
63.7934
71.7254
80.2403
112.991
89.5414
103.93
37.7664
130.502
92.3051
130.887
154.611
105.697
161.85
73.4579
49.1931
126.475
91.3771
78.1376
54.1771
107.82
60.089
66.7381
29.6123
83.7791
83.4959
83.7157
28.1755
65.8784
115.638
171.422
128.91
78.6778
122.069
87.9662
70.7037
110.422
74.1097
104.033
107.198
109.222
105.563
118.561
81.1161
78.3778
33.8332
71.8193
80.3766
57.3204
56.2175
102.748
34.1502
112.954
82.2613
28.5763
93.4387
80.4738
91.3722
47.9011
114.741
55.3301
205.467
93.5232
125.382
30.9935
80.0027
		7.00086
108.641
62.457
109.934
116.1
109.444
28.008
27.1163
107.437
104.613
76.0895
112.554
82.6522
138.288
93.5113
89.4376
107.11
101.452
61.1287
66.9223
102.191
87.9965
121.807
104.836
77.1742
109.297
109.709
104.845
77.2291
35.1989
85.0934
53.3827
83.4759
106.448
29.3598
119.06
136.075
96.3562
74.8975
132.842
155.255
101.085
88.2342
65.402
149.965
90.7401
97.3874
101.41
65.5541
35.1999
129.618
37.8242
88.268
172.717
146.323
66.0528
74.3058
77.5316
132.222
104.125
71.8394
88.4639
90.6191
112.302
79.1163
119.19
52.8147
56.0559
71.0365
95.4281
85.4595
103.144
123.462
152.946
82.2392
29.5515
138.578
72.1902
158
76.3231
74.5271
110.331
95.5819
86.9243
101.047
66.1067
51.664
261.345
117.921
45.5957
55.4968
111.4
85.796
28.5613
76.0808
90.9051
106.021
75.0201
80.518
127.416
136.966
69.0607
81.4128
83.0693
80.8761
65.8617
31.7846
56.2606
72.4456
49.2711
72.1624
101.173
136.636
200.662
58.7581
134.512
88.9855
34.9413
38.8713
68.655
72.4413
47.5343
56.7719
66.0125
132.709
91.0463
101.636
65.0025
115.624
82.451
91.6887
90.9745
49.0415
99.7346
80.4268
42.4661
113.874
89.8124
108.985
146.151
115.019
103.673
72.451
70.3128
172.46
28.4432
134.545
146.171
104.724
76.2585
102.78
148.976
118.635
89.2276
93.8084
98.6047
125.806
103.6
128.029
92.397
67.9252
103.448
119.252
117.245		7.37455
64.2698
103.473
47.5313
78.1559
96.1199
109.672
52.1966
146.887
66.1696
90.8527
87.5692
116.63
98.9113
30.3514
53.0948
36.0267
92.2218		6.84041
36.7958
57.9081
84.273
84.8351
157.845
72.4069
43.1937
52.0426
77.4483
50.9101
102.224
63.7485
84.4508
127.411
58.4028
95.2817
29.0459
243.775
125.915
116.609
171.414
89.3359
72.4283
138.812
111.576
98.0453
97.2044
120.269
115.536
32.0674
134.026
206.523
115.38
30.863
104.701
91.5798
87.0666
92.0404
159.849
72.6998
100.037
43.6895
92.0457
50.2395
92.2302
118.625
86.0112
70.7179
64.3369
86.2986
141.944
170.955
135.783
111.075
89.3482
85.0055
65.7821
89.3116
82.0713
87.4551
65.0961
81.6445
89.675
44.9938
107.084
67.1879
57.2234
114.737
144.926
51.5735
83.4574
95.2433
81.0022
93.5656
144.677
102.381
77.5284
55.4061
82.8783
76.1338
63.1816
114.733
27.1268
50.3224
42.5934
49.997
28.3269
84.8982
55.347
136.656
91.4863
134.953
		7.34763
180.61
67.8174
120.581
83.8414
40.3998
89.5421
44.3299
64.2166
67.9523
171.025
70.8428
47.2372
84.5049
120.082
82.1638
142.648
138.874
137.624
140.172
127.913
106.103
148.26
96.9374
75.149
91.3382
84.4458
154.223
73.0656
99.2912
182.139
117.805
54.2395
77.0295
78.3606
54.5607
50.0898
61.0981
57.2991
28.7535
57.9245
94.0413
197.595
66.2987
108.464
92.3636
92.7946
111.536
103.068
65.1535
81.8793
116.062
53.3042
77.5647
74.1841
74.9743
208.008
76.7534
46.5724
107.974
62.3728
198.106
94.5864
106.57
87.6391
29.4029
181.643
57.9997
115.868
164.842
110.785
213.527
64.6005
30.8741
117.022
100.503
75.2242
112.179
228.846
139.875
30.1007
93.3573
95.2802
66.7852
61.9713
159.842
82.3736
111.916
73.8881
97.7852
143.5
88.1503
91.793
170.778
110.429
89.2448
140.428
128.854
78.8239
107.54
91.1145
132.76
152.102
71.9165
111.965
89.0269
78.1581
103.517
181.725
106.033
138.837
71.3334
58.4741
120.129
154.347
74.5081
104.33
106.071
350.69
74.4827
138.022
130.623
70.4766
77.7915
223.245
66.8044
211.026
108.847
66.4283
226.839
35.2965
92.096
106.362
52.3436
63.3307
129.592
138.035
178.561
78.9377
54.8336
91.2434
79.0307
98.2033
66.3278
135.37
134.934
149.894
76.1952
167.182
131.896
116.197
133.413
193.512
78.9335
54.2166
81.9
31.807
138.563
71.8679
30.0279
115.487
41.8138
106.791
84.7664
		6.35142
55.5109
		8.31643
111.753
89.9388
174.346
92.7912
58.8451
83.2324
107.561
188.139
98.0186
106.686
29.892
135.098
104.512
74.6563
105.551
79.0808
103.464
70.9503
82.0135
125.907
91.061
148.062
40.3848
61.8394
103.624
96.7363
52.2552
71.7997
225.961
83.6278
123.854
115.503
106.904
82.9855
120.333
100.517
71.9433
45.0234
110.617
98.3957
96.2279
83.9687
114.137
87.3198
132.422
72.0222
89.7581
85.2195
88.41
112.899
72.9519
71.549
83.5673
89.1115
		6.83132
73.7717
63.541
116.491
88.5157
94.5502
95.7841
86.3098
134.189
117.539
100.07
86.4286
28.5896
63.7612
184.679
121.499
90.946
102.077
153.277
30.6265
55.3138
92.7885
67.5899
99.6217
93.397
61.9695
116.242
117.155
142.873
154.289
110.043
204.651
92.9491
96.9805
45.2098
60.0552
111.523
29.1993
49.2931
137.875
59.0971
188.636
107.707
70.3547
122.649
156.414
55.0994
93.5419
165.143
64.7893
146.285
102.006
135.602
92.5023
98.6847
157.624
120.677
128.736
54.0488
118.581
67.5123
31.4701
72.1522
43.5349
97.2706
57.7506
91.4221
90.7966
64.5415
48.8873
88.589
98.5536
82.7701
73.8282
143.064
30.188
105.877
28.1511
83.8139
75.5228
80.953
96.1068
77.2638
32.7742
28.4639
71.8463
91.1086
95.9368
33.6987
111.319
53.4038
134.405
168.406
167.239
77.9686
86.6062
113.876
222.179
136.454
125.492
70.1465
85.6511
66.4489
89.1205
87.7007
96.744
78.1968
100.218
98.9879
92.0871
95.3198
68.547
98.5758
103.199
47.1684
123.255
31.3173
137.707
212.884
123.03
41.3579
85.9236
74.6956
238.992
94.5612		7.39889
156.875
115.809
78.0974
93.1456
91.4256
91.2481
61.3796
58.3585
108.98
103.266
137.901
74.6146
65.4276
88.6021
54.0854
44.497
165.27
64.3162
98.3669
30.7419
109.827
107.301
52.5599
55.3194
57.4661
46.8255
100.718
170.152
209.026
105.007
168.364
81.6041
109.228
94.2985
77.2858
35.6402
88.0659
97.4599
72.5191
132.243
69.0031
92.6425
82.3188
108.903
129.42
85.3276
119.371
119.215
47.1852
90.1873
63.1884
60.0444
143.099
66.1042
61.7854
92.5199
71.3442
80.9792
31.1523
31.8961
61.4769
136.95

## Sheet: 895red
[28Si]+ (cts)	[28Si]+ (cts) no small particles	[29Si]+ (cts)	Average intensity (counts)	m/z	% abd	Average int (cts)	Abd corr			Size (nm) edge	Size (nm) center	Pb mass (fg)		Average intensity (counts), All	Average intensity (counts), No small		Low end cut-off
154.178	154.178		144.203	28	0.9223	155.653	168.766			0	0			144.203	147.551		45
150.915	150.915			29	0.0467	7.41878	158.86			10	5	0
83.3948	83.3948									20	15	0
347.267	347.267									30	25	24
79.0084	79.0084									40	35	29
184.016	184.016									50	45	11
29.1013										60	55	20
97.4288	97.4288									70	65	30
67.5944	67.5944									80	75	66
184.659	184.659									90	85	94
194.64	194.64									100	95	105
143.769	143.769									110	105	156
134.354	134.354									120	115	148
76.8194	76.8194									130	125	154
86.9614	86.9614									140	135	168
63.7574	63.7574									150	145	166
191.868	191.868									160	155	149
137.667	137.667									170	165	121
108.948	108.948									180	175	87
172.192	172.192									190	185	84
135.22	135.22									200	195	63
342.105	342.105									210	205	59
164.759	164.759									220	215	44
210.829	210.829									230	225	33
330.551	330.551									240	235	28
231.103	231.103									250	245	17
76.1348	76.1348									260	255	11
148.578	148.578									270	265	9
89.7209	89.7209									280	275	8
		7.45402								290	285	6
28.486										300	295	4
158.714	158.714									310	305	6
318.518	318.518									320	315	6
190.598	190.598									330	325	4
93.5724	93.5724									340	335	6
106.309	106.309									350	345	6
151.783	151.783									360	355	2
92.3384	92.3384									370	365	2
269.658	269.658									380	375	2
136.186	136.186									390	385	5
188.438	188.438									400	395	1
88.5183	88.5183									410	405	2
79.1792	79.1792									420	415	1
154.475	154.475									430	425	0
406.584	406.584									440	435	0
105.519	105.519									450	445	2
125.11	125.11									Total		1886
85.8602	85.8602
114.313	114.313
152.666	152.666
137.825	137.825
112.314	112.314
127.299	127.299
166.126	166.126
155.92	155.92
168.551	168.551
108.938	108.938
152.278	152.278
149.134	149.134
215.235	215.235
168.691	168.691
168.67	168.67
197.507	197.507
144.714	144.714	6.42199
101.61	101.61
145.538	145.538
135.48	135.48
90.2428	90.2428
119.807	119.807
119.173	119.173
197.393	197.393
171.615	171.615
134.044	134.044
146.324	146.324
103.579	103.579
97.4411	97.4411
122.779	122.779
166.206	166.206
185.645	185.645
76.6415	76.6415
74.9892	74.9892
91.2207	91.2207
119.952	119.952
70.5056	70.5056
230.764	230.764
77.4233	77.4233
323.905	323.905	7.27336
143.57	143.57
194.12	194.12
251.004	251.004
34.2015
117.239	117.239
163.588	163.588
105.943	105.943
145.616	145.616
149.639	149.639
212.54	212.54
148.236	148.236
207.146	207.146
165.511	165.511
158.124	158.124
106.696	106.696
191.17	191.17
193.883	193.883
108.445	108.445
257.808	257.808
61.2429	61.2429
138.943	138.943
116.825	116.825
168.917	168.917	8.4955
205.285	205.285
177.107	177.107
105.175	105.175
135.943	135.943
150.324	150.324
135.543	135.543
116.248	116.248
181.144	181.144
149.691	149.691
247.84	247.84
213.759	213.759
124.846	124.846
257.184	257.184
237.998	237.998
157.8	157.8
116.674	116.674
182.208	182.208
134.782	134.782
		6.41144
126.846	126.846
122.671	122.671
116.007	116.007
151.652	151.652
115.327	115.327
131.947	131.947
123.804	123.804
218.408	218.408
186.257	186.257
211.684	211.684
175.448	175.448
523.052	523.052
203.131	203.131
84.1655	84.1655
116.844	116.844
201.838	201.838
136.198	136.198
125.105	125.105
80.6369	80.6369
119.092	119.092
202.1	202.1
144.096	144.096
100.604	100.604
166.109	166.109
111.118	111.118
101.411	101.411
174.81	174.81
335.742	335.742
211.329	211.329
123.305	123.305
223.694	223.694
244.498	244.498
105.709	105.709
205.667	205.667
182.37	182.37
94.1661	94.1661
115.929	115.929
179.651	179.651
188.487	188.487
205.728	205.728
168.11	168.11
154.312	154.312
82.4479	82.4479
102.183	102.183
185.427	185.427
122.847	122.847
179.23	179.23
142.751	142.751
115.743	115.743
142.074	142.074
179.773	179.773
125.125	125.125
154.355	154.355
141.838	141.838
117.759	117.759
166.377	166.377
110.545	110.545
157.917	157.917
189.116	189.116
176.415	176.415
118.373	118.373
142.177	142.177
157.855	157.855
107.242	107.242
114.05	114.05
121.853	121.853
209.482	209.482
162.641	162.641
151.846	151.846
187.11	187.11
102.712	102.712
154.364	154.364
231.617	231.617
201.955	201.955
182.943	182.943
119.252	119.252
186.155	186.155
153.925	153.925
126.66	126.66
200.273	200.273
126.637	126.637
157.549	157.549
170.812	170.812
77.2924	77.2924
64.4543	64.4543
171.884	171.884
103.315	103.315
124.901	124.901
170.345	170.345
92.0448	92.0448
192.882	192.882
239.543	239.543
277.61	277.61
56.1336	56.1336
233.168	233.168
165.029	165.029
113.094	113.094
28.0445
		6.62934
237.025	237.025
132.33	132.33
124.519	124.519
165.336	165.336
130.334	130.334
68.6831	68.6831
168.755	168.755
150.96	150.96
195.762	195.762
190.146	190.146
153.322	153.322
139.588	139.588
159.201	159.201
103.876	103.876
211.943	211.943
117.8	117.8
106.868	106.868
74.1472	74.1472
126.712	126.712
145.851	145.851
168.81	168.81
159.665	159.665
110.456	110.456
89.1996	89.1996
116.752	116.752
124.697	124.697
192.111	192.111
221.387	221.387
302.865	302.865
143.898	143.898
122.545	122.545
133.266	133.266
233.71	233.71
188.645	188.645
82.4459	82.4459
124.928	124.928
124.67	124.67
		7.07737
168.776	168.776
195.871	195.871
165.851	165.851
222.245	222.245
152.519	152.519
77.4763
153.778
165.078
102.574
203.17
330.503		7.63175
173.935
92.3049
152.515
141.87
201.543
146.32
112.154
144.27
198.619
76.7792
142.14
258.046
354.615
178.761
154.488
167.073
169.515
100.076
136.647
133.422
137.437
145.652
119.382
159.215
199.91
76.5827
		6.76236
28.6617
187.86
184.02
132.119
101.27
137.426
166.132
164.421
237.695
340.645
172.264
157.846
126.617
213.694
102.701
90.6531
173.847
105.714
115.712
145.838
99.3499
146.358
149.447
83.6171
134.509
134.3
58.4928
91.9065
110.006
151.875
176.537
149.365
108.666
56.3038
187.229
106.084
100.798
176.787
107.517
117.676
120.769
179.728
27.9865
95.3885
140.191
103.84
223.076
188.239
27.8428
211.515
190.753
271.606
95.5401
238.42
128.281
156.087
138.004
104.908
189.86
101.438
34.708
209.298
172.572
174.782
157.714
		7.36765
106.281
139.103
126.425
30.3676
83.4568
149.824
93.3495
101.019
67.5761
187.201
126.193
199.148
170.754
108.284
186.305
139.373
61.3345
650.703		8.57238
148.442
138.135
179.743
131.61
80.6596
123.645
177.245
116.807
159.932
114.263
112.286
103.745
92.2352
102.397
31.3398
277.972
135.701
123.565
150.539
215.338
123.645
173.658
115.32
124.14
108.483
143.177
58.597
73.4465
121.211
192.831
134.67
185.627
117.497
100.991
121.942
131.666
107.435
120.307
194.665
110.587
200.97
71.79
101.544
159.899
126.468
74.1945
221.347
37.5441
205.935
85.2369
87.4935
177.702
116.225
206.409
152.174
141.297
149.271
102.842
219.678
98.9328
181.856
138.191
106.806
129.828
116.517
227.049
184.605
114.68
140.91
226.035
283.933
244.008
71.0018
165.745
122.891
58.2652
213.801
110.936
76.2757
56.3044
		6.78298
180.895
188.62
158.202
134.947
100.955
118.289
269.798
84.6897
167.186
137.314
100.473
178.727
105.544
64.4986
140.479
132.353
180.888
230.416
151.076
153.125
157.422
137.203
163.968
117.94
117.911
121.245
83.9053
191.043
145.763
82.9587
150.019
174.304
88.2664
116.879
30.279
157.257
68.4553
100.293
112.248
382.791
130.871
169.926
169.799
278.758
147.364
103.411
82.4428
240.506
112.721
96.219
105.588
145.45
92.3956
		7.52227
138.66
173.92
144.133
74.4738
169.893
176.878
40.2149
160.089
137.388
238.525
236.695
104.562
193.499
107.52
150.323
128.801
202.415
115.109
152.525
32.7644
234.058
84.2942
28.4117
248.658
33.263
140.996
197.796
203.568
		7.28184
136.428
183.356
112.134
119.736
77.5118
165.988
124.507
27.4356
130.195
122.897
65.1548
180.355
120.779
176.768
		6.60156
201.565
69.9723
374.769		9.91884
126.882
255.454
91.6804
41.6084
226.392
106.838
147.605
115.751
107.117
217.864
87.9363
216.427
27.8914
110.942
177.038
129.012
		6.72833
369.907
251.579
120.319
133.746
36.1871
128.564
38.4141
29.1722
177.651
89.6874
117.53
240.895
150.716
189.919
109.467
105.765
164.61
92.8767
159.505
248.751
121.287
161.479
98.1759
92.2386
112.769
95.9969
162.017
224.733
99.3338
166.636
104.867
125.633
128.46		8.70191
30.1118
108.091
185.735
121.204
233.125
104.487
67.4725
97.4294
94.8136
121.546
149.382
268.572
159.61
162.325
135.326
93.3214
202.948
46.7147
146.356
207.432
132.77
133.835
87.008
182.643
76.0589
133.294
219.463
226.856
173.802
150.256
286.797
233.336
165.898
142.895
103.641
222.875
204.068
195.519
156.16
85.7022
183.613
147.44
175.926
122.549
150.698
99.8904
139.647
206.821
181.432
148.014
126.762
309.708
130.857
57.3236
133.173
82.9026
72.9845
87.3735
94.4771
61.6804
106.804
135.066
111.811
97.9127
147.993
200.719
137.606
95.9022
227.364
109.125
179.341
128.644
101.755
252.82
139.445
73.6193
149.258
137.003
83.7614
141.782
166.136
72.6728
52
121.545
118.32
137.763
72.3078
232.991
86.5743
88.5266
126.999
177.244
33.4386
165.737
88.1209
135.547
84.174
97.8234
202.645
87.0433
96.7966
160.429
139.33
86.9208
190.078		7.36419
203.702
91.5312
134.242
164.024
128.645
110.719
66.775
113.731
195.511
149.884
48.7645
96.5206
110.601
156.38
165.043
189.214
162.376
		7.61947
144.556
121.914
182.538
124.388
266.845
123.657
122.482
136.643
28.7787
164.035
158.208
140.037
220.044
132.316
146.189
97.7317
149.709
121.887
172.394
144.33
		6.85723
33.7145
164.787
328.247
227.685
202.803
156.319
172.352
88.5494
133.318
145.328
154.341
146.836
98.4886
175.099
114.978
127.199
141.47
133.14
206.045
101.278
159.831
185.431
84.1207
75.8127
198.726
156.201
95.3955
146.828
126.738
192.48
137.388
215.342
173.392
117.137
124.089
145.611
138.744
146.439
132.934
99.1099
163.293
78.6949
154.815
164.513
170.328
188.499
137.548
103.226
107.41
182.405
137.561
108.25
28.8935
250.082
190.042
84.9154
84.9016
153.343
218.594
160.316
72.2621
154.755
93.8054
90.0613
114.694
155.165
312.733
176.708
99.9413
142.749
121.134
100.909
152.536
128.022
164.115
144.465
74.4384
125.385
119.56
178.396
160.299
75.6956
378.095
129.286
101.706
83.2979
141.995
121.677
155.247
121.106
126.135
99.7491
133.239
75.721
159.16
202.625
100.379
95.5571
117.667
142.291
70.7725
225.079
139.383
138.479
157.285
169.041
106.79
163.069
80.5943
198.609
135.534
29.5504
197.861		7.78587
173.66
78.0757
177.142
110.268
108.345
141.062
152.853
180.11
164.356
33.7522
176.29
206.982
242.749
147.571
143.43
102.6
193.346
75.626
153.635
108.735
49.9034
95.5597
61.0215
141.072
180.237
124.882
80.7942
157.164
306.953
183.883
122.648
154.857
80.956
388.738
168.029
92.6404
107.135
284.236
140.468
150.543
154.342
107.879
96.8874
120.966
159.561
87.5229
89.8429
109.892
135.065
174.763
114.853
113.661
114.849
117.431
389.892
175.68
148.829
123.884
27.8176
164.08
73.1904
90.6811
154.035
143.741
29.2671
121.255
107.006
212.102
218.635
94.0572
		6.21183
114.662
310.824		5.95828
80.5768
134.41
294.225
141.133
92.4598
138.12
98.6549
109.549
81.1261
204.521
92.3331
76.0974
61.7972
129.22
91.4249
97.8946
164.818
94.2012
184.777
151.174
210.441
81.7857
188.197
112.292
110.961
123.143
153.828
182.065
195.752
167.405
97.7721
52.1542
202.138
61.6646
92.5597
210.786
297.713
73.9491
123.007
131.475
110.718
140.481
120.078
186.472
125.809
160.676
139.978
270.497
152.182
141.005
314.847
67.3019
102.892
99.1943
160.963
		6.79283
165.472
90.6498
69.3853
138.9
214.01
73.6535
301.718
202.095
235.469
126.02
133.648
153.974
116.956
120.539
135.71
152.767
155.918
153.674
100.635
132.6
146.579
144.402
112.286
133.36
63.4269
211.762		6.53505
142.925
184.915
149.549
183.28
268.096		7.99396
115.902
152.13
85.8564
146.024
183.638
209.564
169.921
164.313
118.028
193.666
126.048
113.607
131.453
107.649
180.494
179.611
126.027
281.466
199.844
100.637
147.84
84.0254
109.068
218.888
90.9092
184.076
248.199
131.545
191.691
177.953
209.993		6.74545
86.9285
212.394
138.425
139.912
141.336
216.298
128.473
97.1508
129.88
131.346
279.174
96.2549
137.492
220.318
132.544
167.331
157.324
147.271
148.762
103.428
143.226
110.789
124.578
156.61
217.153
166.135
221.666
59.7366
96.0028
207.624
85.0916
108.203
87.2806
106.119
145.437
88.5319
29.3406
94.8706
157.903
89.7954
164.681
203.618
		6.64878
208.178
205.638
166.199
92.9563
150.867
268.569
160.98
93.2437
97.5752
104.949
		6.86007
96.8526
89.2672
118.785
168.599
137.683
119.119
120.167
152.131
183.051
142.002
181.657
133.013
185.164
138.295
133.207
133.614
191.308
109.285
133.892
85.8823
126.007
139.96
107.434
250.991
122.934
118.569
30.321
127.748
150.411
108.812
54.2773
79.2293
192.197
76.0202
29.5529
188.647
138.808
95.9746
112.388
226.595
123.426
128.7
91.9685
96.1521
72.9269
211.949		7.50882
78.9614
144.808
142.874
147.045
126.934
163.817
142.67
223.731
169.936
145.748
97.1337
126.482
113.251
141.006
179.267
219.649
197.916
172.261
205.759
151.846
164.967
163.245
90.5625
81.5953
61.4718
86.3451
178.117
103.354
154.571
294.184
112.283
340.252
338.602
111.087
84.4387
136.315
139.495
168.279
183.171
81.8525
113.939
136.076
167.652
113.984
218.996
180.359
181.453
203.554
147.245
214.195
181.458
119.748
153.816
291.532
102.008
216.329
119.012
202.384
220.432
105.938
116.435
49.8903
88.7765
162.555
153.521
117.728
110.898
118.585
150.485
137.553
150.519
150.785
54.373
103.13
94.8522
111.371
245.36
110.551
156.207
191.1
107.817
29.1236
136.729
117.041
246.922
143.33
135.537
30.576
70.7933
155.255
147.822
74.4655
138.035
174.804
157.18
202.415
84.0666
121.93
90.4138
142.497
152.922
131.311
190.296
126.317
29.804
178.448
117.093
30.0955
199.53
71.9102
53.9884
176.178
114.321
201.048
95.7946
97.2348
150.325
94.848
117.82
104.829
67.5533
86.2527
234.875
35.0609
210.86
180.518
143.492
123.457
167.435
161.215
138.48
110.254
197.078
47.8466
86.1792
126.857
		6.81575
85.1312
78.8009
138.077
137.887
109.844
128.015
104.578
89.9529
216.077
87.6413
157.139
113.406
94.1768
86.7859
135.104
119.608
104.078
141.489
193.991
125.106
131.905
107.302
168.29
150.604
138.261
196.78
97.9505
141.853
125.609
138.455
156.254
149.155
115.522
155.663
136.122
89.8451
124.835
97.4347
158.215
92.051
146.29
131.009
160.649
83.9501
121.945
119.088
107.949
94.9626
79.2721
105.848
227.278
173.441
147.933
114.663
139.579
159.969
125.063
178.816
289.389
30.8778
107.145
104.774
161.413
163.429
125.116
113.369
171.039
135.961
118.47
239.823
162.719
206.27
157.318
91.0568
38.7325
48.8999
28.73
148.08
175.557
56.8698
157.504
112.762
390.678
101.847
149.78
184.348
184.927
141.176
		6.52287
83.3374
140.564
109.183
130.92
173.698
60.3024
167.478
149.822
58.1261
173.284		8.12023
146.742
77.4381
71.0149
191.842
122.196
124.918
111.403
224.715
150.543
140.891
96.5962
50.8768
142.134
337.94
70.1424
175.159
135.639
141.952
98.0879
82.6847
180.006
109.709
27.2924
132.199
30.3858
408.697
73.4426
88.3091
68.0336
181.011
143.055
163.914
71.5326
151.287
146.385
105.382		7.9017
124.309
107.456
156.894		7.33966
108.809
137.963
106.062
140.384
93.4604
70.7212
102.36
209.059
168.832
78.6696
137.214
215.143
183.02
29.054
130.237
123.265
150.171
		6.81442
207.993
83.5885
114.319
145.345
381.241
167.433
93.46
251.895
122.604
129.805
144.649
180.882
31.7651
231.554
156.296
136.993
144.637
47.8698
126.399
214.178
193.699		9.51583
61.9207
129.45
149.167
124.172
161.042
137.428
159.136
77.869
144.903
112.618
120.495
44.2398
60.0994
221.174
122.578
227.928
145.25
178.313
152.51
101.284
170.178
155.624
142.807
155.248
118.31
380.971
165.783
190.31
95.5875
165.031
203.355
123.136
103.19
131.228
55.1716
82.9269
179.884
126.876
153.935
104.945
105.334
171.05
203.035
162.066
129.075
107.071
250.086
118.811
105.013
118.924
283.005
160.519
141.355
113.029
176.843
104.548
103.601
207.557
36.9386
305.664
134.919
102.595
232.066
87.1875
105.599
101.915
117.656
124.886
163.215
146.303
194.27
186.017
166.87
101.792
122.545
151.851
93.3699
190.48
139.913
98.9438
225.153
200.977
147.435
124.459
119.65
141.975
104.86
129.015
165.562
138.712
169.742
186.679
149.944
116.809
120.232
201.685
197.561
310.96
267.161
115.888
113.72
110.445
196.559
180.463
132.667
136.206
161.954
138.036
109.777
195.135
127.146
336.644
221.094
85.9563
162.985
125.409
104.926
204.777
160.187
60.4829
150.658
153.823
31.1092
223.727
146.466
135.948
168.55
106.378
136.066
162.815
141.175
186.924
323.484
118.622
51.8323
137.017
135.343
301.385
167.929
171.571
205.53
135.457
106.925
226.592
144.737
107.994
97.2009
120.857
76.9741
110.777
125.791
94.486
189.026
152.363
171.743
148.598
186.415
146.329
104.518
132.045
204.7
87.9148
108
359.362
112.471
129.899
55.2026
109.669
110.996
141.765
124.502
141.975
153.03
128.216
217.719
361.149
31.1149
69.0375		6.72235
245.931
264.799
115.712
157.755
167.466
155.616
153.284
347.098
191.49
111.304
131.994
129.492
210.848
109.791
45.8134
278.851
194.094
277.964
148.379
144.432
96.6038
136.927
130.377
88.5705
129.422
165.734
216.36
127.951
415.334
91.8372
145.856
150.23
142.006
175.712
130.444
181.248
177.715
133.572
140.236
109.996
158.5
108.373
164.053
245.108
102.968
154.02
92.8134
108.187
121.211
119.432
176.536
147.458
200.158
242.012
89.1124
139.611
145.143
87.477
83.0906
151.642
142.185
165.579
124.123
109.439
199.677
173.278
148.139
118.592
121.546
141.838
88.5166
143.71
119.631
162.843
150.383
187.277
163.014
140.828
105.623
104.089
226.469
200.831
143.381
127.344
154.6
153.632
83.3272
162.777
175.923
138.228
154.498
122.892
85.5908
150.571
216.469
234.264
146.409
129.565
166.672
181.319
145.716
208.119
168.303
150.15
174.959
136.55
90.9407
147.502
161.692
62.1567
144.096
139.325
117.773
114.946
145.368
192.925
145.342
72.0917
118.424
146.42
197.21
72.4593
222.269
139.69
137.501
139.018
137.48
83.0175
148.78
137.201
163.769
83.1908
84.8853
146.223
116.465
222.927
165.759
147.719
186.483
159.704
229.372
139.72
151.379
103.635
61.6136
156.877
266.593
99.2532
73.2474
162.827
113.236
218.425
141.635
113.943
84.5991
110.816
132.402
143.023
125.243
233.547
317.529
82.2496
72.4076
28.966
82.3129
187.993
138.838
119.699
29.4055
104.875
184.523
98.5782
156.962
180.684
118.648
106.736
121.218
143.775
125.017
135.801
148.859
205.561
107.18
138.924
192.326
191.468
131.022
100.811
86.0757
186.303
174.327
240.284
133.742
152.344
133.29
174.116
140.406
173.693
192.093
134.494
36.7339
321.547
179.145
152.235
139.456
181.3
91.898
238.809
130.822
56.7137
91.7628
160.657
233.704
77.0653
112.005
146.39
168.825
120.71
156.692
70.2162
102.216
214.751
172.843
162.621
96.6426
131.683
127.538
113.157
91.1322
210.502
120.771
138.346
125.005
156.471
114.284
32.0366
30.2659
121.84
91.8575
138.126
78.5757
145.365
139.09
158.182
150.597
170.969
		7.60923
159.995
132.172
190.108
162.649
177.067
120.302
112.337
177.297
189.598
151.603
113.647
191.089
77.1776
104.346
179.206		9.43539
246.46		9.65514
136.073
71.7728
102.638
107.198
341.665		6.48153
101.747
166.465
86.1237
159.214
134.526
175.669		9.15649
113.397
151.295
		7.23796
116.798
30.6629
143.882
127.54
244.926
88.0878
100.208
107.666
117.618
113.067
239.339
187.044
103.246
193.839
127.625
223.64
122.951
145.635
72.0508
102.329
107.167
167.086
108.909
236.339

## Sheet: 990red
[28Si]+ (cts)	[28Si]+ (cts) no small particles	[29Si]+ (cts)		m/z	% abd	Average int (cts)	Abd corr				Size (nm) edge	Size (nm) center	Pb mass (fg)		Average intensity (counts), All	Average intensity (counts), No small	Low end cut-off
219.606	219.606			28	0.9223	228.96	248.249				0	0			217.955	224.745	45
138.411	138.411			29	0.0467	7.75383	166.035				20	10	0
270.078	270.078										40	30	65
142.088	142.088										60	50	6
212.228	212.228										80	70	17
769.305	769.305	7.34574									100	90	38
242.815	242.815										120	110	58
99.1362	99.1362										140	130	98
137.87	137.87										160	150	156
28.4422											180	170	191
135.702	135.702										200	190	246
132.089	132.089										220	210	214
209.266	209.266										240	230	191
248.169	248.169										260	250	144
193.951	193.951										280	270	104
79.0128	79.0128										300	290	80
240.545	240.545										320	310	65
285.643	285.643										340	330	50
138.128	138.128										360	350	35
231.026	231.026										380	370	28
303.618	303.618										400	390	11
206.335	206.335										420	410	26
194.874	194.874										440	430	10
230.481	230.481										460	450	15
423.361	423.361										480	470	1
88.9875	88.9875										500	490	11
156.723	156.723										520	510	5
233.929	233.929										540	530	1
212.631	212.631										560	550	5
364.808	364.808										580	570	1
277.299	277.299										600	590	1
337.137	337.137										620	610	1
110.949	110.949										640	630	0
		7.02426									660	650	3
215.517	215.517										680	670	1
99.738	99.738										700	690	2
231.669	231.669										720	710	1
275.06	275.06										740	730	1
156.208	156.208										760	750	0
283.367	283.367										780	770	1
172.938	172.938										800	790	0
236.351	236.351										820	810	1
213.159	213.159										840	830	0
261.241	261.241										860	850	0
344.347	344.347										880	870	0
239.343	239.343										900	890	0
291.317	291.317										Total		1819
147.807	147.807
204.835	204.835
238.422	238.422
101.927	101.927
212.877	212.877
29.2302
229.979	229.979
289.001	289.001
137.64	137.64
184.716	184.716
132.78	132.78
519.013	519.013
154.176	154.176	7.14793
139.951	139.951
376.547	376.547
221.273	221.273
131.998	131.998
299.544	299.544
405.237	405.237
179.544	179.544
341.74	341.74
200.014	200.014
199.849	199.849
219.761	219.761
124.781	124.781
196.624	196.624
400.745	400.745
88.2445	88.2445
294.195	294.195
124.997	124.997
204.996	204.996
105.634	105.634
156.597	156.597
249.866	249.866
295.505	295.505
209.116	209.116
207.421	207.421
242.708	242.708	9.25632
245.353	245.353
220.593	220.593
230.959	230.959
161.537	161.537
346.821	346.821
280.612	280.612
218.596	218.596
211.334	211.334
288.935	288.935
262.596	262.596
171.833	171.833
233.446	233.446
131.776	131.776
231.996	231.996
303.89	303.89
234.151	234.151
304.25	304.25
193.452	193.452
160.119	160.119
189.751	189.751
122.788	122.788
546.498	546.498
121.402	121.402
255.838	255.838
173.823	173.823
328.86	328.86
220.18	220.18
348.498	348.498
317.723	317.723
173.46	173.46
196.685	196.685
143.473	143.473
203.488	203.488
140.899	140.899
287.997	287.997
28.9064
402.251	402.251
45.5393	45.5393
321.584	321.584
181.155	181.155
262.557	262.557
176.959	176.959
120.506	120.506
390.173	390.173
204.038	204.038
154.388	154.388
247.373	247.373
278.735	278.735
260.851	260.851
214.033	214.033
224.259	224.259
253.64	253.64
221.28	221.28	8.82781
		9.18701
153.375	153.375
359.976	359.976
166.095	166.095
244.041	244.041
174.34	174.34
170.672	170.672
173.139	173.139
81.0584	81.0584
137.047	137.047
194.471	194.471
290.736	290.736
241.096	241.096
193.36	193.36
238.669	238.669
186.979	186.979
141.239	141.239
141.864	141.864
232.88	232.88
146.788	146.788
149.555	149.555
27.9992
267.841	267.841
280.29	280.29
284.474	284.474
178.118	178.118
269.045	269.045
267.059	267.059
235.23	235.23
220.773	220.773
158.332	158.332
193.103	193.103
143.162	143.162
29.736
82.2759	82.2759
146.061	146.061
208.726	208.726
181.191	181.191
256.969	256.969
229.729	229.729
176.314	176.314
200.799	200.799
268.932	268.932
252.472	252.472
125.74	125.74
188.984	188.984
227.109	227.109
367.897	367.897
146.835	146.835
167.656	167.656
141.802	141.802
		6.34546
185.599	185.599
264.026	264.026
28.22
219.24	219.24
187.331	187.331
213.282	213.282
160.362	160.362
164.364	164.364
271.02	271.02
459.306	459.306
174.721	174.721
137.107	137.107
30.4681
297.33	297.33	8.6535
197.203	197.203
160.239	160.239
537.653	537.653	7.92243
34.863
175.347	175.347
165.623	165.623
202.24	202.24
372.157	372.157
257.129	257.129
291.43	291.43
414.525	414.525
347.926	347.926
135.467	135.467
346.222	346.222
333.283	333.283
181.343	181.343
146.345	146.345
155.4	155.4
112.432	112.432
143.277	143.277
367.858	367.858
238.185	238.185
180.468	180.468
292.943	292.943
280.413	280.413
198.05	198.05
323.611	323.611
130.289	130.289
517.684	517.684	6.93325
129.448	129.448
272.277	272.277
221.145	221.145
241.91	241.91
233.888	233.888
196.711	196.711
166.538	166.538
117.18	117.18
177.033	177.033	7.28399
161.987	161.987	7.25441
153.442	153.442
196.199	196.199
449.031	449.031
210.964	210.964
211.493	211.493
174.525	174.525
514.612	514.612
224.348	224.348
212.617	212.617
115.942	115.942
145.043	145.043
211.495	211.495
43.0739
185.848	185.848
334.04	334.04	9.41795
233.955	233.955
253.647	253.647
205.126	205.126
331.407	331.407
695.235	695.235
187.86	187.86
153.951	153.951
189	189
188.929	188.929
438.722	438.722
299.633	299.633	6.73031
28.5708
394.423	394.423
201.023
282.611
231.031
207.683
238.903
28.8619
240.927
232.606		6.64986
216.459
182.078
272.604
354.957
215.45
217.524
184.056
187.242
226.47
237.115
188.413		6.44279
206.609
141.459
168.801
239.423
386.448
149.446
259.525
161.21
213.996
30.1043
234.745
201.538
245.504		6.48928
180.151
295.136
179.619
135.773
129.459
349.613
177.668
232.874
360.283
247.867
235.435
316.005
141.385
200.838
203.277
170.112
208.415
212.434
238.515
211.043
120.082
208.427
307.832
193.658
196.096
168.806
195.404
157.654
189.589
144.009
311.324
498.443
300.416
288.351
182.553
152.575
186.944
254.236
203.217
230.195
184.615
27.8832
260.313
74.2238
232.456
287.976
163.778
180.102
167.687
255.783
196.447
140.59
406.302
338.82
346.773
274.401
99.4979
248.531
322.115
202.571
245.572
168.654
106.902
211.795
188.452
232.751
453.742
130.272
166.655
298.934
207.106
140.752
235.331
123.866
177.145
214.552
30.7156
61.1797
177.359
207.951
139.78
216.124
219.151
190.272
79.9266
27.5601
365.779
134.909
511		6.65448
242.896
293.606
232.395
109.677
181.063
211.845
158.088
198.63
183.007
205.248
163.349
227.248
182.107
149.361
211.726
120.613
216.552		6.97215
276.297
133.603
31.6506
		7.19612
269.383
146.039
176.546
199.323
271.133
227.26
274.662
149.953
264.27
198.651
266.049
229.626
234.963
114.565
260.906
315.216
452.624
173.414
187.402
224.876
243.808
278.401
340.639
179.563
248.955
106.206
170.46
163.986
244.104
250.895
162.954
329.591
195.438
174.414
33.9432
171.405
124.778
94.0346
260.309
248.697
179.68
185.942
191.301
151.189
153.712
212.24
161.344
221.668
221.959
223.599
176.274
413.88
191.115
		8.20643
293.093
184.114
185.068
107.938
224.378
126.481
180.495
124.821
212.448
166.175
168.334
84.1896
156.156
229.791
293.282
92.9582
28.7255
259.731
158.928
155.192
426.643
221.534
168.022
129.241
74.3899
166.746
104.938
137.499
189.81
240.346
157.008
332.314
388.514
68.329
158.935
217.767
195.345
152.727
202.744
415.441
37.3916
306.662
198.43
186.809
109.683
209.396
332.804
158.293
185.063
225.027
268.955
305.766
201.182
232.339
141.462
301.368
138.436
144.42
268.127		7.44113
222.294
236.797
259.768
163.248
326.309
242.269
167.392
186.045
187.08
546.809
188.51
489.861
249.656
		6.71851
217.443
181.954
130.564
175.569
323.998
192.219
214.494
163.488
216.332
216.471
251.474
180.928
251.808
308.1
179.474
268.88
212.452
204.275
176.533
176.605
191.002
662.317		7.34632
300.941		10.9256
236.261		7.16461
370.967
		7.76842
407.681
164.357
190.849
173.828
257.704
151.418
75.412
207.414
203.727
238.779
460.02
82.3677
495.221
153.996
289.476
202.193
181.022
149.759
237.538
297.756
147.773
28.5916
281.436
274.725
111.562
218.095
244.075
184.694
181.216
191.202
230.751
176.17
159.408
141.82
198.387
117.741
218.363
194.322
242.036
		8.19749
259.345
258.767
91.165
29.8312
206.057
223.552
143.24
106.243
163.587
33.0513
193.38
111.669
223.104
138.515
306.953
156.648
117.614
115.906
298.513
35.624
157.814
180.16
414.458
138.248
149.675
147.186
98.6735
145.982
276.856
227.507
440.966
302.418
195.225
357.899
253.5
334.944
275.077
30.7009
178.284
316.012
159.365
171.759
212.898
153.085
193.096
274.603
		7.01758
203.558
145.959
305.704
152.543
206.495
332.556
161.747
158.565
155.561
188.649
186.532
164.984
260.822
171.26
215.949
208.199
340.962
321.033
173.395
363.312
177.329
246.907
97.0548
242.939
159.196
242.394
222.085
184.17
31.622
286.757
257.18
261.888
206.09
264.094
206.297
148.61
254.695
236.816
247.499
134.83
197.96
312.662
154.654
35.5695
226.928
215.146
169.427
237.629
171.756
179.586
242.8
179.852
228.002
257.942
208.516
540.401
241.926
182.692
171.24
607.976		10.3361
119.622
		7.18784
186.918
170.137
28.3055
175.145
195.674
279.925
452.901
213.723
189.724
144.089
137.467
28.8338
150.219
153.515
123.144
127.091
219.176
125.358
687.12
227.141
224.09
267.435
		7.80829
208.861
112.224
146.584
309.905
68.6557
237.867
257.728
331.038
252.467
189.101
166.15
315.48
159.137
158.752
274.663
276.522
240.894
195.661
187.196
164.981
116.426
148.407
221.81
105.68
185.193
448.843
199.274
258.064
324.655
187.978
210.616
230.507		6.72939
366.197
207.456
179.638
233.838
171.968
213.782
149.66
327.462		8.52371
324.318
183.614
269.28
243.283
121.068
183.251
337.912		9.90134
186.893
314.877
224.694
78.3782
141.597
195.616
230.086
402.2
204.042
173.674
180.651
272.901
145.289
285.08
218.886
		6.48864
195.78
137.226
301.662
247.606
214.606
160.105
220.513
183.592
276.366
106.623
201.096
450.387
240.147
233.605
220.163
184.742
190.768
241.152
166.414
439.162
27.9441
299.881
204.707
183.941
247.692
202.478
225.481
145.405
236.73
298.524
33.6786
255.611
198.41
209		6.91353
28.8992
236.485
171.534
217.333
480.623
225.574
263.095
207.065
258.417
228.507
184.245
316.087
186.759
205.179
161.151
142.861
216.137
129.926
173.04
115.681
		6.78274
356.79
		6.93487
225.924
193.88
200.383
		6.38418
125.618
244.148
150.444
195.581
144.093
142.682
62.3357
183.212		6.89128
194.765
211.229
233.355
238.295
210.291
29.8045
390.669
214.228
184.318
141.793
298.762
183.333
150.144
163.569
58.0669
213.438
186.857
199.78
177.05
232.86
142.681
250.706
180.586
259.5
139.19
174.467
209.462
109.55
177.527
239.841
194.13
303.723
361.347		10.1426
33.5442
254.45
142.993
189.875
265.864
398.538
253.791
266.717
245.74
362
458.678
234.57
196.288
168.617
217.117
246.229
308.953
237.329
422.831
701.546
152.597
309.43
248.16
253.248
279.131
183.462
218.786
374.153
233.023
29.2616
154.921
282.161
317.354		8.6064
276.143
240.472
203.801
123.252
370.899
404.464
274.414
211.741
		6.50194
340.401
216.956
178.653
294.36
195.581
238.283
243.308
255.728
143.849
292.37
304.38
153.598
330.681
358.775
134.894
130.516
180.38
97.7354
223.272
130.672
243.958
197.072
269.981
292.601		6.52069
327.118
186.119
184.133
251.138
227.422
272.812
281.83
342.733
251.163
295.502
193.82
231.258
205.386
138.298
85.4101
268.98
220.104
207.642
160.076
115.523
273.629
174.541
205.424
158.399
200.771
149.774
200.868
189.742
185.516
30.47
254.828
93.5448
214.404
285.453		8.86539
247.589
200.125
192.865
178.746
313.216
303.133
		6.32343
205.905
317.281
267.948
172.964
162.024		6.58966
143.721
225.96
161.292
236.381		8.28
		7.07141
213.131
547.957
316.883
		7.30805
198.019
261.96
237.201		8.14477
206.26
116.875
344.313
177.384
185.177
194.229
		7.90812
45.3101
379.722
362.189
306.767
203.522
207.092
211.969
205.025		8.64103
340.827
641.157
336.867
209.817
197.098
283.321
370.589
300.749
194.794
209.323
131.601
245.712
206.982
200.242
245.04
120.268
272.656
221.869
232.48
162.695
288.777
418.388
335.899
333.339
175.221
350.572
232.798
27.9459
184.082
198.843
189.986
168.51
202.65
166.363
192.483
111.664
		7.13275
27.9543
125.364
106.006
145.838
147.985
162.991
187.209
327.233
212.721
216.003
333.397
210.704
295.17
152.079
230.084
180.599
		6.64533
179.906
211.351
401.627
152.654
133.35
334.09
211.101
182.611
259.255
326.082
259.648
271.425
302.629
191.591
174.003
145.49
104.145
121.044
141.801
255.67
240.745
229.529		11.8299
207.352
131.891
278.506
353.325
74.7835
95.9127
287.538
118.812
279.923
31.4814
85.3946
105.886
159.169
206.773
412.317
201.119
		6.83301
239.301
233.649
327.082
278.012
270.447
29.862
175.227
271.369
161.463
311.311
159.794
		6.96401
418.252
139.717
252.762
192.992
299.077
215.093
258.26
181.274
368.111
315.216
260.324
183.761
204.898
225.258
129.006
190.611
207.759
204.252
264.981
317.17
191.194
179.273
83.8787
290.04
224.895
175.998
296.303
32.2052
276.184
170.475
288.43
301.907
259.285
310.515
213.527
86.1437
218.002
120.128
256.915
185.887
103.238
174.485
230.178
55.9676
161.491
268.645
256.399
227.186
149.198
304.747
156.826
361.601
265.683
246.937
117.551
207.43
191.646
207.903		8.23696
351.598
251.555
		6.77077
261.499
231.897
210.07
158.921
185.188
219.097
187.289
245.837
98.4616
133.604
281.034
165.217
297.241
221.488
177.603
205.464
151.809
252.274
295.82
198.693
149.69
146.242
190.229
209.524
226.497
199.154
		7.10336
805.374
141.855
196.855
175.861
191.078
179.706
173.666
49.2526
270.534
192.644
406.953
378.348		9.36387
33.4691
214.445
174.591
247.453
274.853
214.204
180.287
186.499
267.103
313.047
253.813
217.648
218.705
243.202
358.219
		6.4886
233.915
212.888
171.809
275.968
180.324
194.62
331.673		10.8835
250.338
214.959
197.337
217.266
307.59		8.2719
197.675
210.051
336.331
227.292
195.661
164.977
215.345
351.933
223.391
164.842
192.032
239.517
277.672
540.49		9.49841
225.987
457.832
197.398
402.245
120.416
222.563
148.053
482.351
199.638
205.034
36.6623
189.828
162.749
376.656
237.614
282.657
196.509
193.427
110.914
113.556
127.404
212.022
290.132
126.482
219.413
198.968
291.345
220.617
233.629
215.495
308.73
341.252
104.677
218.069
445.208		8.10381
151.398
213.953
81.4825
141.781
160.78
234.982
418.539
266.367
233.811
148.204		7.83886
222.896
406.065
200.977
168.501
243.974
147.313
268.59
245.927
303.052
189.74
258.885
247.923
195.705
236.242
		7.20244
231.911
322.466
201.214
264.793
183.736
183.458
234.911
195.34
389.686
193.27
315.642
498.852
183.849
154.214
188.278
204.002
		7.46307
160.134
232.058
176.995
101.906
32.4208
96.8014
176.332
166.989
170.758		7.26445
244.134
263.589
160.454
205.59
296.072
151.503
187.14
121.094
160.462
241.39
256.781
135.5
187.486
146.999
290.685
197.193
653.941
		7.15816
202.995
116.674
109.586
138.111
228.877
292.992
189.708
496.698
30.1195
176.452
171.381
247.328
280.116
227.466
245.975
212.562
193.08
28.2474
289.087
184.133
419.457
263.253
166.241
352.773
154.451
176.548
280.043
245.872
187.488
178.677
185.844
296.122
247.085
119.186
251.738
34.2679
194.224		8.63913
130.326
112.658
161.712
326.283
195.523
225.184
402.787
332.94
237.287
308.412
268.807
142.26
136.614
240.331
141.449
291.81
202.425
88.0233
146.277
187.339
126.745
37.1358
201.394
174.623
164.76
423.964
349.227
127.141
206.609
28.0165
184.662
251.76
226.282
234.193
31.3572
342.29
194.762
160.414
194.149
311.591
		7.26413
128.374
331.193		6.26683
259.717
347.34
215.101
234.696
31.5685
118.756
134.227
311.302		7.67403
210.431
101.206
451.177
219.315
201.486
235.669
243.643
316.636
176.727
125.282
192.367
245.676
178.709
193.55
188.985
250.802
186.949
214.523
209.055
174.217
174.293
148.917
159.004
395.773
238.082
176.474
206.033
179.288
242.87
92.4805
161.649
311.73
118.017
181.033
596.676
179.689
299.876
367.823
211.205		6.54966
233.378
426.047
31.637
298.875
276.448
		6.60882
65.9296
158.34
364.696
492.08
89.9915
216.965
246.745
175.176
282.314
269.281
230.158
30.1283
375.852		7.19621
411.472
230.391
212.644
155.162
171.03
136.505
127.897
150.146
105.327
285.052
263.475
198.587
238.538
229.529
127.234
491.864
258.353
162.716
295.257
233.454
483.028
174.664
322.556
223.961
262.327
153.913
277.38
317.703
308.942
183.6
170.297
248.073
108.291
142.229
249.603
168.281
29.1328
168.716
231.559
254.48
177.565
494.33
208.587
234.787
238.248
217.943
83.8701
28.5285
320.534
180.143
101.39
138.121
162.686
180.417
191.962
183.79		7.85571
254.585
		6.57105
95.0767
215.847
449.1
29.2719
268.108
189.241
264.207
189.161
202.185
27.9365
255.375
207.788
323.47
169.57
186.215
238.658
157.302
208.113
103.461
159.17
29.6268
27.5773
195.956
259.715
153.009
134.915
154.629
212.058
254.997
228.89
199.913
90.5357
347.582
231.104
203.729
237.95
195.345
220.818
427.295
174.14
134.501
211.044
228.767
331.889
167.389
303.998
77.0326
352.912
146.746
223.466
154.534
217.55
221.522
347.524
166.798
124.911
227.054
229.087
377.32
341.971
268.129
175.106
146.112
194.532
219.562
170.997
175.642
251.533
87.2625
216.489
178.536
198.833
264.972
184.824
182.678
31.5026
284.043
196.492
142.211
171.112
306.419
296.158
156.904
303.794
646.467		10.0171
208.865
313.254
195.602
174.312
190.298
255.723
332.781
222.423
156.602
245.72
134.492
198.818
172.148
163.921
202.82
181.669
355.275
419.449
214.813
425.094
733.91
199.638
319.656
333.035
261.732
248.995
269.174
181.352
122.088
135.657
192.177
364.634
237.236
33.5563
205.958
294.248
241.036
142.841
173.761
211.823
211.505
223.436
264.887
158.789
147.946
82.4749
28.1391
39.122
282.272
27.4883
327.058
175.431
222.422
228.363
100.561
153.777
140.018
35.3019
105.32
79.6329
224.52
333.074
187.688
222.542
303.235
250.483
136.868
136.137
227.956
213.693
167.547
401.08
225.534
281.497
230.17
233.977
197.935
245.307
278.737
239.724
143.731
200.239
241.107
270.452
249.656
364.041
222.26
		7.18317
159.726
349.728
257.732
188.614
75.3405
213.699
454.377
279.142		6.79017
112.764
444.408
141.517
219.332
268.301
264.14
153.208
217.29
299.542
197.306
27.1405
135.047
169.817
112.832
115.376
182.892		11.7227
61.2261
182.613
188.732
166.921
201.279
213.322
257.51
210.246
145.946
157.068
130.986
186.746
433.831
261.769
270.567
330.062
406.998
339.719
242.385
92.0887
187.462
236.325
214.013
286.879
178.605
286.634
221.527
97.418
230.16
286.051
117.254
225.047
187.449
97.3546
278.512
183.384
130.215
130.113
238.476
230.08
184.39
147.908
195.876
300.977
211.997
222.807
153.833
121.159
179.551
300.812
388.358
221.718
301.812
402.698
178.929
198.963
101.013
188.28
221.817
250.079
143.292
381.583		13.2303
146.99
181.874
192.692
256.798
238.8
224.175
335.483
170.83
270.418
135.625
197.07
104.681
240.292
214.333
235.622
237.689
179.901
337.917
91.5151
191.782
242.018
173.26
393.895
302.384
189.614
94.2619
184.538
264.512
227.743
227.853
194.879
176.425
153.052
29.1798
82.6789
319.453
508.199
178.741
296.972
179.573
264.436
239.089
564.06		6.37844
171.755
214.74
264.284		6.78412
121.839
126.737
168.513
196.349
154.991
177.354
121.869
228.406
170.698
244.917
206.047
283.182
172.029
67.7146
198.749
365.505

## Sheet: 1050red
[28Si]+ (cts)	[29Si]+ (cts)		m/z	% abd	Average int (cts)	Abd corr		Size (nm) edge	Size (nm) center	Pb mass (fg)		Average intensity (counts), All	Average intensity (counts), No small
143.23			28	0.9223	252.176	273.42	126088	0	0			251.631	252.176
285.151			29	0.0467	9.06605	194.134		20	10	0
142.837								40	30	57
162.052								60	50	10
596.185								80	70	20
220.018								100	90	47
333.541								120	110	99
	7.99558							140	130	153
251.061								160	150	203
616.621								180	170	241
513.714								200	190	249
235.349								220	210	229
208.587								240	230	197
131.457								260	250	146
207.835								280	270	109
111.528								300	290	63
232.742								320	310	45
211.389								340	330	33
248.475								360	350	29
199.29								380	370	38
194.046								400	390	18
516.837								420	410	16
32.0318								440	430	19
191.528								460	450	8
217.44								480	470	5
142.36								500	490	8
206.149								520	510	11
139.706								540	530	10
174.674								560	550	7
100.566								580	570	12
772.732	8.33822							600	590	16
34.22								620	610	7
241.176								640	630	6
200.988								660	650	6
357.974								680	670	6
211.887								700	690	5
181.693								720	710	12
251.5								740	730	4
62.9726								760	750	6
140.441								780	770	8
	6.99017							800	790	6
246.771								820	810	5
162.998								840	830	6
28.4475								860	850	8
280.05	7.45924							880	870	4
208.257								900	890	1
765.209	8.59177							920	910	6
305.729								940	930	5
199.328								960	950	4
29.3603								980	970	1
203.101								1000	990	3
135.526								1020	1010	4
129.31								1040	1030	4
210.225								1060	1050	2
218.896								1080	1070	5
162.24								1100	1090	14
155.838								Total		2179
225.598
211.615
162.796
175.324
240.537
274.965
273.422
171.246
551.806
31.6156
201.49
385.96
167.007
179.364
368.309
303.261
154.173
163.183
218.82
318.745
29.5541
185.859
87.186
150.405
138.843
279.926
228.232
101.676
252.137
325.882
262.529
	9.15378
144.015
135.348
67.819
94.3742
107.884
133.138
165.343
123.258
161.759
240.766
137
256.955
30.7162
124.766
230.446
227.502	7.11159
209.224
252.147
164.034
261.08
166.65
127.227
1061.29	8.98786
235.277
547.359	8.44696
248.238
214.896
189.182
226.373	7.62292
129.783
38.5138
163.311
170.297
117.731
196.636
297.904
217.474
193.391
118.948
170.761
256.791
73.4066
262.5
264.461
198.639	8.78307
29.4536
30.8312
182.923
202.586
156.613
257.446
382.083
102.252
157.323
185.949
179.564
229.424
145.203
221.729
239.507
284.153
254.391
192.524
	6.67861
138.244
138.599
181.571
135.294
179.107
229.517
202.214
187.377
177.556
348.192
240.809
183.705
188.439
266.207
204.67
483.972
246.489
123.775
	6.8891
220.53	7.22716
226.577
1125.7
235.629
28.9851
113.413
143.078
133.211
1115.17
190.336
423.158
454.971
253.555
427.659
185.214
101.23
193.425
129.362
136.554
165.269
173.564
209.725
243.789
130.275
304.278
910.099
272.208
309.67
343.789
150.483
242.179
162.683
204.954
111.52
389.052	6.60494
173.949
113.887
432.743	6.81201
167.644
125.157
136.854
164.141
191.633
151.758
	7.65557
302.663
278.174
211.87
1231.33
236.57
221.028
180.168
232.742
579.319
583.102
139.288
247.177
168.454
100.435
145.035
139.102
183.836
283.917
213.603
846.198	14.8479
164.473
225.596
245.322	7.04705
219.621
148.081
227.582
191.571
116.575
82.3293
150.585
171.541
870.836	10.127
173.616
372.61
204.553
295.396
180.322
984.752
214.75
772.468	7.46474
80.3389
180.529
196.676
125.467
173.933
153.809
187.185
268.275
218.475
161.881
131.362
124.947
928.718
152.115
120.421
633.991	7.56104
596.856
138.158
219.053
947.998	8.78653
175.59
156.427
	7.51033
202.585
130.07
164.798
145.152
300.215
788.274	7.46384
329.022	7.30749
322.198
190.597
192.921
146.403
224.763
251.394
209.499	7.45117
217.422
228.088
197.265
187.178
207.318
357.758
165.833
240.77
363.009
255.441
271.646	9.78814
270.379
267.471
342.949	7.83157
230.204
353.383	7.42167
395.6
228.805
117.255
294.276
151.303
116.685
200.804
27.0719
254.591
116.491
164.42
201.864
247.224
1505.67	8.02607
200.232
131.934
27.5817
220.149
167.144
162.707
168.496
228.017
244.168
216.798
314.022
211.384
	7.53165
328.634
173.272
104.809
359.673
243.023
162.948
310.802
258.887
199.121
173.787
205.781
191.591
159.555
140.703
253.617
198.246
109.581
146.262
191.254
143.287
185.107
243.278
200.171
258.453
376.537
165.168
757.846
283.407
385.752	7.17558
84.277
192.97
410.285
139.728
172.589
1307.49	18.4712
211.661
163.634
185.09
187.431
240.964
239.371
287.989
220.313
265.111	6.87613
112.097
196.868
214.891
481.009
219.89
190.702
93.1572
434.815
179.884
247.071
167.071
304.207
78.971
279.405
336.73
28.6455
238.906
198.974
147.499
261.977
128.59
188.207
211.846
195.223
185.794
181.932
650.818
29.8776
138.697
340.523
175.453
234.383
202.292
130.93
203.876
178.365
254.853
293.215
100.014
242.992
300.217
200.804
180.947
202.06
465.281
27.8542
213.326
264.535
149.106
204.152
225.598
	7.32504
171.566
254.046
37.0285
198.236
1041.88
110.309
131.079
133.826
775.713
273.853
176.299
96.2198
256.89
122.509
216.572
216.994
585.715
205.986
207.292
741.446	18.7855
110.152
249.668
253.125
187.045
985.589	11.5426
230.91
241.335
187.578
72.8379
712.663	8.3479
136.035
169.005
138.499
281.548
79.9542
208.035
1522.88	7.98448
128.716
120.345
168.838
252.66
151.096
602.703	8.98178
196.207
35.4477
915.427	8.06477
58.6046
488.482
184.992
176.421
162.776
267.623
162.193
235.059
118.016
218.506
231.877
118.611
606.362
297.851
167.242
34.006
300.386
241.655
150.457
245.877
550.513	7.72552
201.374
152.097
149.363
177.849
206.712
303.323
257.289
129.288
202.323
438.408
512.576
941.908
248.495
277.429
254.318
169.277
	6.94429
264.561
208.865
385.855
227.484	7.03303
242.654
173.342
660.464
412.019
186.254
82.7925
148.132
348.712
717.957
53.9934
244.993
173.661
815.472
364.723	7.10422
570.978
116.477
184.487
156.204
900.445
185.552
169.815
208.756
731.558
141.542
173.333
398.177	8.79811
209.109	7.44162
125.032
160.009
150.746
161.226
172.902
252.179
240.562
197.386
213.115
184.012
166.138
137.92
220.662
1060.5
488.593
37.5905
319.116
1084.02
190.202
196.22
140.997
141.618
111.547
108.817
149.195
359.096
733.945	17.4402
224.964
227.022
71.5831
116.888
210.14
260.279
109.628
131.148
659.566	8.30715
301.841	6.9084
195.988
233.53
225.463
179.997
112.702
259.544
196.414	7.64792
103.543
223.456
197.75
125.97
270.151	11.9879
224.584
205.589
142.569
157.334
30.0603
219.306
364.252
212.261
232.524
226.917
98.9584
116.183
140.701
176.879
195.599
129.063
165.038
191.931
98.5231
229.232
132.22
115.236
225.036
410.601
869.33	6.81941
278.848
27.8206
124.203
216.001
171.956
176.938
329.2
194.787
329.88
120.245
432.568
183.358
233.442
170.448
85.2082
190.326
352.843
155.902
140.313
184.063
179.123
230.611
235.056
228.65
136.861
210.728
180.382
224.04
249.31
268.732
330.2
378.545
374.636
182.217
245.325
172.514
190.587
272.319
238.318
198.007
291.584
	7.3373
147.044
206.987
162.432
244.247
188.78
227.652
618.33
205.914
38.3976
284.608	7.06684
127.009
239.932
174.486
267.463	9.55586
201.498
532.51	11.4025
222.75
245.413
264.826
262.067
213.242
38.4525
698.145
268.039
253.3
187.926
163.784
93.0855
133.159
773.31	7.4688
141.885
457.999
166.176
94.0785
151.199
269.092
264.477
126.853
1026.26	9.74653
161.81
29.0133
206.329
171.078
278.236	7.75616
159.275
375.354
251.251
120.766
114.283
833.702
181.643
157.754
237.804
269.168
224.041
438.32
199.649
174.544
186.735
29.2339
130.591
136.473
183.76
291.988
135.864
126.458
145.656
128.923
143.874
313.841
157.371
35.8699
247.065
943.58	21.2477
233.614
210.545
281.957
328.839
139.661
88.2618
131.539
183.347
196.964
229.827
229.075
250.673
199.211
588.44
151.814
156.86
135.071
860.876
	7.17564
166.905
	7.48413
172.293
183.69
243.413
116.457
1004.89
360.327
297.437
504.363	7.21025
196.621
199.144
29.0498
322.821
496.97
213.357
202.094
347.598
1154.48
274.068
188.182
195.37
166.106
219.117
	6.99896
184.197
560.901
164.644
139.386
153.873
189.728
182.599
174.055
257.975
59.4288
421.984
282.861
1150.06	21.7094
184.873
263.955	8.31771
298.713
176.708
212.522
821.702
	7.9247
210.862
130.047
258.66
204.599
258.208
275.94
369.939
226.587
215.359
230.72
911.938	9.41506
377.232	11.4392
178.261
172.526
150.81
201.215
311.476
235.766
158.997
223.663
161.911
229.104
37.5234
142.633
176.329
185.905
434.469
30.5803
242.815
269.417
156.811
199.699
595.846
	7.08702
250.861
87.0933
199.463
1221.36	14.0766
274.657
202.357
538.256
195.511
144.746
112.508
565.15
228.342
338.391
181.532
297.975
101.233
636.032
152.695
179.605
288.201
208.95
160.319
305.1
181.693
813.649
354.774
134.81
189.979
185.508
382.577
183.767
271.721
140.363
225.81
314.108
111.391
232.005
107.651
266.627
129.215
217.747	6.97631
416.348
218.845
321.833
229.727
719.349	8.6751
244.025
426.127	9.28784
144.553
148.181
181.647
234.261
192.303
250.763
245.667
239.717
812.575
137.109
117.108
166.8
217.59
159.54
177.584
171.321
1074.98	12.0999
210.36
698.976	11.7364
220.066
149.656
303.799
183.72
155.263
31.3786
285.774
197.216
200.833
119.536
197.968
161.178
224.793
184.635
134.716
156.297
215.302
209.851
141.954
229.924
250.892	6.90875
227.312
425.022
159.53
573.07	9.23719
261.288
29.3824
209.758
174.012
289.816
150.457
378.999
157.252
282.903
298.167
373.567	7.24091
236.975
128.384
223.461
217.786
125.261
162.655
94.1377
175.291
88.585
266.442
173.553
162.664
195.647
387.829
182.61
209.972
871.095
102.399
70.2195
210.395
232.339
206.913
184.883
226.791
238.595
628.183	7.30302
199.548
142.351
404.099
264.659
154.158
202.337
1249.56	10.7893
191.54
420.369
216.155
185.243
230.481
180.122
161.638
291.274
173.343
129.53
86.3884
186.042
252.329
188.704
209.31
156.723
197.046
224.941
513.418
320.305
187.956
199.535
741.376
220.698
239.068
78.6679
691.317	7.49187
202.493
390.513
301.099
295.153
377.113
236.123
142.529
155.464
213.523
147.262
850.949	7.34524
127.498
157.806
927.791
210.388
167.208
185.633
417.183
136.25
116.088
311.039
254.358
115.721
174.878
174.037
156.53
134.99
371.375
523.615
312.053
341.127
110.929
28.1191
588.072
319.693
28.1951
236.039
295.691
172.491
139.664
159.974
153.117
149.952
216.276
316.429
209.595
125.987
195.547
210.795
395.3
277.914
457.134
382.85
108.737
738.826
222.995
195.54
326.258
237.632
269.885
237.321
704.462	9.21114
38.1784
135.094
215.664
201.866
120.946
227.514
170.998
442.072
677.253	9.01919
489.913	9.4629
112.423
153.266
150.283
176.339
164.683
200.777
232.391
902.231
199.851
199.683
231.114
217.013
250.431
305.405
162.985
153.714
199.459
156.554
274.987
273.977
158.907
124.015
232.961
158.645
257.412
84.7271
164.485
145.954
225.866
237.669
120.183
702.875	7.6668
245.17
1175.96	13.3759
198.902
166.616
211.288
137.31
215.108
242.656
133.355
122.955
216.008
236.334
150.634
160.704
215.412
162.302
164.106
153.368
53.7991
131.542
158.477
243.894
135.835
297.647
196.125
179.535
159.901
174.658
72.5576
166.029
164.968
128.478
584.606	8.25842
246.511
555.974
283.999
367.417
87.0157
56.8178
183.525
146.739
219.09
282.456
190.899
235.49
312.498
195.142
264.235	9.84591
674.217	7.95273
409.975
155.952
292.746
132.901
215.13
187.064
161.099
366.586
217.528
214.22
123.596
216.937
169.328
277.037
131.089
161.202
357.539
227.839
180.379
126.495
218.361
285.083
135.471
225.042
226.276
213.121
164.832
142.566
349.383
236.139
112.681
420.487
303.165
128.794
155.155
235.674
224.678
247.088
228.748
142.228
280.657
172.946
252.299
323.682
229.078
211.36
207.045
175.989
233.997
116.713
29.919
214.825
168.586
278.833
215.936
172.135
260.045
166.266
251.395
324.232
561.931	8.82876
683.145
204.941
185.738
125.478
275.36
201.78
229.476
216.798
184.935
227.649
146.889
263.865
780.347
102.493
192.026
156.309
155.29
271.649
201.821
105.003
169.354
273.166
225.748
189.913
152.455
465.385
228.072
226.622
199.21
229.361
163.197
172.101
208.291
808.034	12.3826
594.084
219.067
131.651
955.819
214.954
97.7715
232.88
270.165
171.453
163.728
783.861
273.528
353.646
28.3537
298.782
362.993	7.59803
98.0969
209.262
180.277
193.588
225.345
215.309
274.893
223.836
293.735	7.07427
249.681
340.923
163.102
113.727
196.26
174.389
170.003
74.423
221.693	10.1126
192.632
153.142
158.635
145.358
933.544
166.073
159.683
232.44	7.44191
265.405
535.293
282.854
227.014
180.436
260.596
253.877
232.557
102.359
196.557
181.758
305.25
255.102
279.139
374.934
165.286
326.689	8.29243
242.539
128.762
221.84
278.527
151.497
	7.35429
276.345
217.238
120.742
211.398
173.51
598.114
143.274
260.913
225.128
101.137
	7.21497
168.186
509.258
353.092
128.886
135.405
88.6012
166.868
229.465
197.848
131.819
348
200.472
857.782
197.857
185.1
305.853
230.46
185.924
	7.01002
	9.07223
245.537
247.486
290.665
174.835
212.035
206.17
410.29
119.772
325.097
140.961
194.485
223.901
249.768
364.699
148.521
850.72	11.0302
242.174
152.773
251.112
201.89
65.7078
192.474
139.216
269.224
165.366
249.244
136.719
198.564
334.336
231.208
243.434
230.562
138.13
296.244
193.218
168.041
245.023
26.6315
157.028
187.589
158.03
361.263
26.8385
369.888
364.228
100.274
	7.29165
200.236
125.502
	7.3001
	9.89899
216.163
240.534
136.291
277.206	6.99584
152.67
156.021
114.659
166.011
162.938
176.618
190.808
931.158	18.9888
233.996
283.532
170.714
169.248
190.889
331.448
224.416
226.652
461.718
29.3687
248.242
179.901
224.797
201.229
288.654
206.031
193.586
452.942
241.321
181.056
101.822
339.064
239.077
125.072
336.512
167.85
178.174	7.38581
196.941
134.538
267.889
81.7068
275.36
720.882
276.658
174.373
275.205
1070.11
240.578
101.527
174.592
366.538
248.662
682.588
278.387
162.261
205.03
270.252
138.19
193.95
143.109
148.387
146.617
275.226
232.883
177.229
87.6188
32.5984
128.263
243.049
176.522
263.025
1014.87	8.8619
199.477
279.552
702.981	8.96332
573.079
29.3614
421.278
152.19
534.552
270.792
183.968
117.136
278.458	8.52806
242.301
219.22
374.747	10.2776
156.229
184.276
257.878
123.205
701.408	10.3338
140.2
137.157
166.721
81.5198
242.697
302.231
400.368
75.6544
300.541	6.68693
89.6588
207.365
186.452
204.441
183.265
28.2655
222.024
280.328
137.951
305.894
105.273
142.312
191.598
230.151
203.278
117.435
243.5
672.81	11.6171
262.733
340.586	9.26148
532.223
59.1197
779.524
211.955
181.166
185.333
67.3389
76.6653
706.116
160.506
246.979
360.059
29.8938
203.415
361.491
140.488
229.687
235.633
231.952
114.634
164.069
153.204
354.608
153.665
194.259
184.323
130.697
371.401
217.289
184.044
211.838
218.105
217.445
743.397	10.4105
123.712
225.834
201.911
568.355
419.111
179.979
89.9138
338.156
163.663
193.43
1022.53	6.83967
178.267
179.197
243.142
838.985	7.8797
250.981
269.904
840.536	9.1728
642.048	7.02185
133.617
191.557
226.496
164.427
552.224	7.64728
173.762
232.218
372.753
257.632
140.268
200.038
179.154
275.461
214.791
232.041
257.609
209.591
143.74
198.671
266.61	11.1642
208.146
209.413
167.599
268.089
310.187
225.089
146.554
28.7926
135.368
562.909
262.143
216.132
255.944
274.428	7.66098
160.178
350.265
89.5089
281.666
216.216
112.869
116.436	8.30094
205.533
118.659
206.176
603.511	8.15726
173.126
217.552
193.701
78.34
162.582
243.549
170.776
122.441
239.868
106.543
256.104
1050.98	12.4296
175.678
90.8231
258.944
164.37
190.151
	6.67822
200.784
452.898
190.509
208.642
415.674
236.511
155.176
285.003
183.325
149.383
204.348
113.303
235.877
166.59
106.33
231.466
143.386
193.602
849.853	12.8999
742.335
216.472
162.225
201.53
189.562
440.014
776.568
187.496
181.089
97.2149
134.373	15.8242
598.475
132.653
215.91
187.994
335.924
288.637
319.004
114.854
112.179
102.392
30.016
447.833
141.57
112.111
198.475
	7.81763
366.16
274.337
190.213
231.001
233.063
229.226
205.012
108.181
129.902
93.6403
216.321
225.901
355.832
94.8827
413.709
144.904
207.62	6.62865
280.786
35.2815
158.008
96.6702
144.198
127.413
711.47
821.482	12.4392
275.068
218.028	6.90333
154.78
171.814
216.325
120.572
162.881
282.307
275.664
54.7711
236.896	7.83677
239.047
143.961
147.579
302.261
205.739
136.663
138.248
215.217
107.015
196.273
146.915
156.415
178.693
1016.93	12.5613
292.246
83.0544
189.355
205.43
147.071
174.987
176.34
116.92
137.694
393.594
282.01
260.632
287.474
428.431
259.774
355.687
234.795
275.486
175.033
142.608
158.891
184.837
216.945
256.11
141.772
117.57
235.42
171.543
211.599
176.178
200.388
129.263
285.885
111.265
133.81
146.348
424.058
515.361
180.383
224.581
209.005
67.8745
187.584
160.995
175.57
243.107
292.233
235.171
196.615
214.676
198.39
205.857
186.156
57.2001
178.435
136.401
219.198
127.019
144.979
173.998
171.222
210.335
135.133
93.4916
33.2987
190.585
258.786
186.207
295.614
160.721
797.779
282.075	6.73381
180.071	6.88594
225
	7.51981
124.333
148.162
255.494
622.618
150.474
249.274
190.835
282.438
172.511
217.639
189.922
318.591
585.343	14.0503
360.212
176.406
252.001
282.773
238.862
828.172
120.366
191.634
146.025
	6.63823
244.981
246.976
193.325
146.295
99.7944
254.88
166.609
547.946
241.706
72.525
408.966
233.319
225.197
143.646
187.523
208.39
180.846
174.453
405.76
161.885
154.105
438.145
243.135
200.421
179.435
204.182
192.882
224.187
229.934
28.4248
174.922
39.3274
213.263
121.321
275.864
419.754
27.5331
135.372
156.17
182.577
1011.53
352.587
141.278
165.479
173.022
180.147	10.453
235.13
171.974
339.728
183.135
236.748
1095.94	11.6489
890.198	13.3858
151.974
188.51
152.861
155.878	7.33436
660.003	6.76387
202.92
154.788
247.236
184.635
192.335
653.086	9.37966
304.674
182.674
244.498
228.719
222.456
199.909
166.939
177.166
157.258
647.343	7.27195
1037	6.66343
359.111
	6.70992
232.913
172.513
148.658
331.354
	6.61695
83.2001
114.987
142.121
172.027
373.38
352.018
228.687
174.381
188.389
162.823
153.712
243.342
33.7277
182.059
900.812
168.921
173.104
256.531
597.839
177.267
239.53
550.845
145.493
208.242
207.469
317.853
254.65
420.397
197.437
112.138
221.422
86.6859
843.208	10.8453
328.522
77.6215
81.4036
254.831
91.3039
186.664
200.897
191.727
182.95
	7.33259
172.22
713.96
323.818
85.1089
262.552
218.18
264.496
181.906
510.621
412.32
211.939
90.556
261.208
204.801
608.052
170.45
149.135
139.77
29.687
192.031
178.217
153.766
265.324
228.876
362.805
214.411
220.116	7.9053
247.761
206.301
181.826
161.03
146.65
830.551	9.45196
190.645
191.836
270.809
539.61	8.48002
163.511
179.51
152.388
305.186
333.617
202.198
55.5743
145.361
209.454
180.139
[truncated: 267 more rows]

## Sheet: 1570red
[28Si]+ (cts)	[28Si]+ (cts) no small particles	[29Si]+ (cts)		m/z	% abd	Average int (cts)	Abd corr			Size (nm) edge	Size (nm) center	Si mass (fg)		Average intensity (counts), All	Average intensity (counts), No small		Low end cut-off
1464.35	1464.35			28	0.9223	662.437	718.245	679.085		0	0			642.66	686.092		100
723.209	723.209			29	0.0467	9.48976	203.207			80	40	65	330
750.436	750.436									160	120	22	0
486.541	486.541									240	200	43	0
511.477	511.477									320	280	63	0
521.028	521.028									400	360	80	0
664.63	664.63									480	440	114	0
523.137	523.137									560	520	125	0
618.746	618.746									640	600	116	0
1807.57	1807.57	12.0761								720	680	111	0
544.781	544.781									800	760	98	0
556.866	556.866									880	840	78	0
389.215	389.215									960	920	64	0
434.631	434.631									1040	1000	64	0
28.1897										1120	1080	30	0
784.428	784.428	10.7788								1200	1160	39	0
298.554	298.554									1280	1240	24	0
1289.87	1289.87	12.9762								1360	1320	11	0
759.457	759.457									1440	1400	9	0
882.858	882.858									1520	1480	6	0
1663.42	1663.42	14.5191								1600	1560	5	0
1526.85	1526.85	11.1976								1680	1640	5	0
1377.37	1377.37	8.87338								1760	1720	3	0
402.968	402.968									1840	1800	4	0
363.452	363.452									1920	1880	1	0
864.066	864.066	8.61983								2000	1960	1	0
613.913	613.913	7.36898								2080	2040	1	0
423.015	423.015									2160	2120	0	0
788.588	788.588									2240	2200	0	0
415.106	415.106									2320	2280	0	0
		7.86184								2400	2360	0	0
945.081	945.081	10.3297								2480	2440	0	0
142.611	142.611									2560	2520	0	0
839.984	839.984									2640	2600	0	0
609.169	609.169	14.4837								2720	2680	0	0
528.743	528.743									2800	2760	0	0
763.95	763.95									2880	2840	0	0
741.853	741.853									2960	2920	0	0
482.522	482.522									3040	3000	0	0
284.677	284.677									3120	3080	0	0
674.739	674.739									3200	3160	0	0
630.444	630.444									3280	3240	0	0
695.843	695.843									3360	3320	0	0
794.718	794.718									3440	3400	0	0
659.889	659.889	7.61286								3520	3480	0	0
305.507	305.507									3600	3560	0	0
265.222	265.222									"90+"	90+	0	0
714.42	714.42									Total		1117
321.054	321.054
		6.61858
907.845	907.845	8.7484
206.868	206.868
753.729	753.729
32.0912
1213.37	1213.37
647.136	647.136
639.217	639.217
505.254	505.254
888.651	888.651
998.104	998.104
296.523	296.523
1049.61	1049.61
540.869	540.869
557.075	557.075
829.777	829.777
910.393	910.393
539.014	539.014
337.589	337.589
272.499	272.499
377.308	377.308
1262.66	1262.66	11.1015
560.367	560.367	11.8917
32.167
1008.4	1008.4	13.3032
570.37	570.37	10.2606
775.386	775.386
568.718	568.718
423.011	423.011
		6.32917
519.043	519.043
353.031	353.031
29.2939
525.487	525.487	7.41944
591.635	591.635
319.06	319.06
532.959	532.959
1612.1	1612.1	7.48282
821.026	821.026	6.60385
942.028	942.028
957.474	957.474	9.60622
491.977	491.977	7.15523
668.925	668.925	11.2289
360.574	360.574
221.063	221.063
415.278	415.278
932.626	932.626	6.46219
842.527	842.527	10.7556
592.383	592.383	11.9769
1079.83	1079.83	8.24231
494.191	494.191
478.277	478.277
675.784	675.784	7.7986
710.411	710.411	9.55232
1009.02	1009.02
931.512	931.512	13.7908
654.139	654.139	11.0652
996.314	996.314	15.8446
521.165	521.165
466.216	466.216	7.08021
329.654	329.654	9.303
651.046	651.046
748.169	748.169
1122.16	1122.16	7.0633
941.843	941.843	8.70293
489.919	489.919
296.555	296.555
		7.24293
335.103	335.103
262.292	262.292
260.492	260.492
767.153	767.153
718.488	718.488
905.718	905.718
427.548	427.548
585.062	585.062
802.802	802.802	6.47383
239.422	239.422
591.476	591.476
727.227	727.227
323.237	323.237
454.196	454.196
1392.54	1392.54	16.9201
1217.64	1217.64	9.45726
372.428	372.428
1006.21	1006.21	7.79429
523.714	523.714	7.92951
186.757	186.757
1080.12	1080.12	7.54074
408.872	408.872
1130.08	1130.08	6.67867
374.473	374.473
706.484	706.484
341.702	341.702
452.575	452.575
770.691	770.691
380.042	380.042
449.38	449.38
998.57	998.57	8.19506
696.71	696.71
1139.45	1139.45	11.0982
974.449	974.449
1140.92	1140.92	14.0014
80.0419
175.905	175.905
150.085	150.085
356.872	356.872
790.092	790.092
1246.75	1246.75	6.50473
		7.88658
231.893	231.893
1264.8	1264.8	7.92461
1061.18	1061.18	9.99104
764.911	764.911	9.61495
1044.25	1044.25
820.468	820.468	12.5678
352.022	352.022
317.729	317.729
531.465	531.465
1270.34	1270.34
27.9001
630.028	630.028
1209	1209
28.5974
29.5186
28.4833
579.08	579.08
744.403	744.403
848.203	848.203	7.59929
28.2297
719.539	719.539	10.8152
822.391	822.391
1149.72	1149.72	7.57816
714.679	714.679
608.04	608.04
671.144	671.144
590.976	590.976
593.093	593.093	7.20206
609.578	609.578
430.724	430.724
519.948	519.948
576.33	576.33
421.642	421.642
		8.90151
911.332	911.332
370.416	370.416
514.771	514.771
371.938	371.938
793.668	793.668
540.502	540.502
581.007	581.007
738.613	738.613	12.5146
452.018	452.018
323.717	323.717
		7.16469
977.576	977.576	13.9852
1282.68	1282.68	7.24075
424.397	424.397	6.85198
651.274	651.274
921.602	921.602	9.05973
283.297	283.297
773.562	773.562
440.515	440.515
342.096	342.096
578.345	578.345	8.72166
746.382	746.382
892.912	892.912
691.099	691.099	7.90608
255.73	255.73
890.99	890.99	17.8283
157.215	157.215
1046.65	1046.65	7.75817
542.341	542.341	7.27643
902.898	902.898
778.148	778.148
594.924	594.924
289.506	289.506
489.379	489.379
1085.51	1085.51
601.301	601.301
105.842	105.842
939.08	939.08
506.19	506.19
563.53	563.53
882.729	882.729
720.833	720.833
832.458	832.458
564.058	564.058	6.89427
608.898	608.898
698.059	698.059
501.017	501.017
733.711	733.711
342.157	342.157
689.069	689.069
500.652	500.652
664.044	664.044
551.446	551.446
28.1904
690.244	690.244
799.845	799.845	8.09418
636.584	636.584
255.967	255.967
334	334
612.926	612.926
1408.52	1408.52
432.656	432.656
868.526	868.526
121.047	121.047
315.66	315.66
1123.23	1123.23
444.875	444.875
720.233	720.233
1305.68	1305.68	6.44471
32.1524
458.675	458.675
634.782	634.782
247.288	247.288
534.949	534.949
404.425	404.425
754.304	754.304
157.789	157.789
282.502	282.502	6.47862
677.241		8.80706
843.266		9.75364
701.278
1104.46
740.502		8.11402
737.844
1789.95
28.5499
490.328		7.48437
708.297
183.406
694.99
887.199		9.60291
498.079
378.044
736.34
652.089
503.674
938.187		9.87759
		6.51382
28.1192
505.221
552.811
556.652
305.283
575.221
717.031
1638.65
538.177
167.115
466.967
486.935		10.6698
1167.72		15.8803
654.193
943.05
649.895		6.85813
800.136
616.296		7.42862
918.185
349.113
31.0099
711.378
		6.46824
741.639
447.411
687.684
525.56
541.83
573.18		6.53163
853.142
671.6
155.803
720.895
672.986
205.63
748.274		9.26152
492.678
754.42		14.0661
899.562
438.915
955.544		11.0192
370.308
745.767		6.93708
		5.99471
177.276
1148.1		16.297
512.756
718.44		14.6701
323.692
753.117
43.1852
896.17
479.334
725.64
546.9
415.206
265.358
686.12
485.664
28.2125
391.896
756.439
406.873
525.858
531.635
1060.44
686.837		6.67148
1172.15		12.1144
741.993
29.28
826.154
420.707
787.901
556.732
751.885
470.854
523.795
918.294
447.506
911.824
569.329		7.89694
530.739
104.056
970.357
166.488
837.103		8.45475
		6.1728
431.681
543.148
602.358
1080.56
981.356		9.18582
613.899
511.739
1280.75
1742.29		8.7364
395.461
141.894
1036.81		11.8551
872.972		8.81669
813.507
868.307		9.98302
		6.7249
898.687
565.915
621.404
26.7571
602.033
		6.4691
752.655
154.484
895.454
380.786
291.468
648.374
1033.17
962.404
516.185
		8.40453
569.015
664.65
735.906
591.72
909.885		6.83477
568.115
458.087		7.70951
906.766		8.68146
429.385
1048.69		8.79556
354.904
241.981
1217.42		9.80553
867.524
783.835
1069.21		11.9818
710.927
987.791		8.07294
728.506		6.54741
199.89
768.164		11.4684
30.8271
425.955
431.487
727.376
542.851
1164.63
299.95
564.356
699.363
301.095
188.891
508.601
814.374		6.54831
507.916
1127.58
877.394		6.30744
671.714		6.95399
490.134
1069.29		10.2163
1058.18		6.35815
571.181		7.79916
965.366
908.804
807.299
519.245
405.109
575.317
1070.19
237.297
525.022
671.498		9.30866
425.778
676.754
448.048
778.187
752.012		7.91413
473.843
73.3727
556.432
511.005
1970.51
1264.9		14.405
815.536
680.563
370.898
346.921
182.312
1060.45
313.549
985.089		8.74642
994.002		6.47292
437.603
224.168
720.139
1189.1		11.2481
485.851		10.0639
758.084		7.57063
764.693
318.77
553.701
814.267		8.09463
773.66		6.98324
444.666
677.011
489.701
369.468
1044.06		8.19605
457.661
269.886
682.427		6.85801
1418.77		14.0673
846.52		8.92867
1003.82
553.872
434.674
856.062		13.7292
784.065
978.571		6.60201
447.434
511.65
424.797
525.021
964.018		8.79099
364.071
341.332
845.234		7.38379
207.293
684.457
1037.78		11.1617
782.035
1117.64
852.235
938.008		9.84745
650.896
730.122
900.495		7.04572
609.643
409.285
51.0588
27.728
467.819
648.715
780.193		7.31842
1204.53
527.813
470.917		6.65073
425.058
991.32		7.94384
459.955
625.76
1018.79
652.949		8.7383
470.198
381.587
694.326
597.998
314.525
746.156
564.441
1286.93
146.51
607.764
233.44
311.69
764.483
909.168
669.504
603.526		6.18349
1161.71
470.116
442.714
52.8168
63.7364
977.627
594.92
246.098
776.211
714.336
972.564
310.414
256.847
511.834		6.42526
343.219
581.518
757.698
792.624		10.9976
554.715
575.247
499.038
470.244
569.889		8.36915
1204.14		17.7294
		6.48865
604.638
841.221
599.022
659.768		10.8793
457.706
946.88
423.874
1488.99		8.44932
		6.3195
601.575
418.296
711.248
852.809
628.637
756.555
794.518
376.487
413.861
739.76		6.73307
421.497
27.0952
399.514
582.176
1150.39		9.7968
1277.47
507.987
757.217
30.0406
732.484
961.576
424.806
		6.10199
560.971
693.383		9.0474
559.631
519.439
778.263
413.367		6.08932
291.916
741.989		10.0362
849.194		6.35554
847.335		9.71086
1816.46		17.9428
1341.64		21.2389
1036.62
560.302
675.798		6.83846
837.491
460.019
139.041
746.822		17.0481
344.873
889.047
593.838
1144.35		9.22183
1442.91		15.4676
214.929
139.223
382.149
299.107
546.01
666.913
28.3341
662.332
544.554
1592.17		17.7967
349.439
28.0341
988.309
283.258
811.868
478.234
387.636
1236.85		12.9652
457.037
349.718
1129.58
408.664
1653.66
189.66
398.94
28.4146
1142.55		7.36172
100.135
366.152
699.913
824.55
645.789
717.104
1039.98		12.6626
601.308		6.36184
873.583		7.09291
		6.26041
1006.46		12.5992
		6.17167
463.812
1110.23
850.346
29.3497
32.2782
456.43
1172.77		14.6253
201.916
28.4792
455.399
30.2667
427.297
856.916
35.1306
276.515
606.344
770.898
1876.89		10.9992
570.466
676.556		9.00885
642.61
889.771		9.71879
490.641
342.242
38.5689
450.034
77.5396
552.98
954.836
972.335		10.8936
1038.21		6.42687
598.809		9.47792
979.523
548.34
1005.88		6.92893
332.586
		6.65847
627.672		7.6938
946.19		9.48978
1003.64
1594.39
664.445		7.1529
997.855
806.082		6.91625
925.572
185.201
826.332
581.382
198.213
639.88
1424.14		9.63252
271.261
274.578
569.85
340.885
582.747
527.925
754.844
489.559
850.885
946.511		8.39013
587.59
651.814
146.357
851.692		6.83079
459.179
		6.79699
429.873
904.16		8.43661
484.238
		6.31102
600.892
33.5523
274.738
736.523
30.9407
684.669
421.201
806.973
945.526		9.64029
374.577
639.503
413.332
734.99
		6.3864
379.526
927.364		6.48847
950.437		13.1737
1559.91		10.5622
789.251
1024.48		12.6751
955.935
1167.22		12.7089
1314.78		6.74202
384.01		6.9026
1030.44		8.7662
1157.53
340.446
457.561
864.293		7.15193
863.997
610.273
245.021
830.232
505.498
468.902
366.476
830.063
205.176
441.227
695.097
486.802
49.2842
374.598		6.5843
27.6817
200.256
574.529		7.78444
		6.41527
1228.04
594.924
631.405		6.98772
430.771
402.073
437.676
65.6967
974.695		11.2389
135.886
948.29
191.735
		6.45102
45.5628
		7.7568
		9.97114
1007.56
1385.97		9.29501
430.773		6.29466
851.469
284.391
1208.36		9.66722
713.267
783.286
280.964
705.775
858.37
1377.3		10.149
330.504
321.942
517.421
638.639
1187.15
530.703
146.021
489.104		6.9395
27.9975
1207.08		19.1733
568.533
513.479
648.233		9.22991
858.645		7.48463
425.429
508.074
388.66
734.726
1126.73		7.79083
967.81		9.37129
484.552
433.179
971.808
598.261
911.56		8.69093
1212.95		12.1519
594.901
707.828		12.7477
977.969		15.5706
573.307
700.15		9.35016
799.998
567.596		11.2951
483.015
468.538
152.488
787.75		7.32285
29.7867
366.379		6.46501
523.508
302.767
677.515
1689.3		16.8819
1007.04
663.475
237.287
27.9599
1068.25
412.52
597.48
246.934
1716.51		19.7535
639.303
632.47
762.271
989.294		12.293
472.539
910.332
279.381
993.052
976.306		11.9803
865.779		6.90929
291.631
596.445
1031.83
470.917
706.524
339.32
337.858
922.929
904.657
303.287
569.683
168.119
676.411
1026.46
1635.46
477.792		8.25149
339.772
313.116
30.3904
806.222		6.87037
875.881
917.801
160.426
979.912
306.652
1368.28		10.6483
1179.25		8.27757
582.067		6.30411
650.927		9.49884
875.488		9.71013
849.178		7.88034
530.271
592.524		7.5124
351.434
453.712
449.271
1170.84
30.8541
567.992
1082.57		9.84929
592.48		8.59421
978.358		7.47437
418.701
1131.72		8.82664
907.314		8.22657
351.084
646.343		7.08137
709.959
29.6805
455.417
1810.9		28.5481
507.745		6.58643
297.096
265.664
466.653
743.619		10.5841
865.445
834.516
561.05
221.576
208.197
619.235
473.474
581.609
787.96
968.268		7.9171
1450.12		20.4002
1247.64
845.951
1067.27
		6.4127
465.592
772.477
484.897
869.52
559.617		7.99546
617.745
728.618
29.1616
755.473
939.977		8.78147
1167.85
523.428
1256.39		14.9427
810.913		8.04645
814.69
572.351
448.086
805.225		8.64229
495.534
249.066
1260.07		7.97884
541.423
367.207
348.077
533.832
849.223
390.186
443.365
426.88
393.695
1089.92
490.737		6.65583
537.589
844.907
545.257
		8.67701
487.143
28.9778
1310.88		11.4745
1213.37
491.035		8.15723
568.766
662.355
1313.62
848.511
707.46		7.51352
844.419		7.84314
48.9942
1083.07
805.55
674.519
596.929		6.95994
1198.78		10.1378
499.46
1012.98
287.995		6.59651
207.653
735.485		6.79935
920.738
425.585
656.971		8.66131
1276.33		11.8349
207.777
663.918
749.457
1127.99		7.55414
885.825
113.879
335.207
467.839		6.47655
665.879		6.32443
327.892
692.738
252.089
440.375
630.563		9.06936
521.152
1025.6
1335.12		9.73704
373.007
29.7172
888.525
331.594
410.059
631.561
292.167
1147.69		12.0052
652.986
504.553
646.693
659.646		6.72709
705.669
747.019
796.678
1063.32		14.5829
435.152
714.489
30.0593
474.947
		7.39477
2044.79		19.534
298.876
406.2
641.583
470.132
1008.75
375.085
1135.97
650.673
192.478
592.018
454.978
311.558
529.84		9.04444
826.553
292.264
903.328
292.09
511.99
1002.14		7.46398
513.296
		6.51316
539.399
709.062
1477.31		35.7137
839.616
208.091
1191.37		9.24252
973.03
26.7516
1031.99
730.265		7.94519
1044.1
61.6443
175.015
1137.77
704.711
205.957
963.581		8.896
580.442		7.33667
386.387
1197.58
30.238
642.173
29.2491
389.459
749.611
584.355		7.20893
809.677
530.264
1105.34		8.13439
413.437
683.637
741.079		13.0448
28.4124
962.496		6.18628
55.0032
677.984
678.259
569.748
520.331
626.877
31.1188
197.401
393.662
		7.38983
28.7354
189.351
214.968
811.432
526.243		10.7168
416.95
382.611
299.586
695.415		7.06563
752.084
553.736
651.711
703.317
1042.2		7.46513
503.714
662.533
930.183
1032.42		6.67913
786.595		8.36101
615.272
927.185
370.232
495.545
824.857
1023.27
284.419
740.906
42.5825
920.423		9.1746
470.508
634.419
1134.74		9.49999
760.344
716.269
818.247
589.486
619.681
1064.71		8.56503
944.699		9.13552
1551.68
32.0489
29.5599
1131.84		8.42981
508.411
1037		19.7677
688.744		7.91003
535.046		12.2457
217.284
1346.22		11.6541
974.472		6.57566
655.159
90.1181
109.65
856.207
452.893		7.26869
231.337
857.775
1060.02
616.856
425.294
221.284
569.193
520.038
1131.79		11.8068
529.097
1390.95		11.8913
622.361
1192.99		12.221
30.173
444.123
265.692
549.93
1206.98		12.821
		10.0024
1243.6
386.829
924.96
774.225
1177.39		11.8998
532.161		7.50086
321.537
269.364
856.98		8.36716
523.385
618.017
748.656		13.6368
826.706
595.236
1469.79
1132.12		16.9921
659.629		12.8677
708.982

[truncated: 11 more sheets: 2060red, 3170red, 480opt, 690opt, 730opt, 895opt, 990opt, 1050opt, 1570opt, 2060opt, 3170opt]
