# Supplementary material for: Challenges in measuring nanoparticles and microparticles by single particle ICP-QMS and ICP-TOFMS: size-dependent transport efficiency and limited linear dynamic range
Source: Royal Society of Chemistry journal article supplement (doi:10.1039/d4ja00425f), 2025-01-01
Supplement: d4ja00425f8.xlsx [file d4ja00425f8.xlsx]

## Sheet: _xltb_storage_
XL Toolbox Settings
	export_preset	<?xml version="1.0" encoding="utf-16"?>_x000D_ <Preset xmlns:xsd="http://www.w3.org/2001/XMLSchema" xmlns:xsi="http://www.w3.org/2001/XMLSchema-instance">_x000D_ <Name>Tiff, 600 dpi, RGB, White canvas</Name>_x000D_ <Dpi>600</Dpi>_x000D_ <FileType>Tiff</FileType>_x000D_ <ColorSpace>Rgb</ColorSpace>_x000D_ <Transparency>WhiteCanvas</Transparency>_x000D_ <UseColorProfile>false</UseColorProfile>_x000…
	export_path	D:\MyFilesCF\Papers\2024 JAAS Linearity and Transport Eff\Figures for paper\Hi Res Figures\Fig 3d.tif

## Sheet: Vitess data
Size (nm) SiO2 particle	Size (nm) Si in SiO2 particle	Mass (fg) of Si	Vitesse opt sens (counts)	Vitesse opt sens (counts/s)	counts/fg	Mass (fg) of particles	Size (nm) of Si in particles	Meas size/actual size		Vitesse red sens (counts)	counts/fg	Vitesse red sens (counts/s)		Density				Counts -> count/s*				Primary	Multiply by	Secondary
500	387.89	61.0847	107.476	358255	1.75947	61.0847	387.89	1		13.2678	3.70346e-05	44226		2				0.0003				1400	3333.33	4.66667e+06
690	535.288	160.535	267.808	892695	1.66822	152.21	525.87	0.982407		17.434	1.95296e-05	58113.3
895	694.322	350.342	585.63	1.9521e+06	1.6716	332.845	682.566	0.983068		22.7	1.16285e-05	75666.7	1.61473
1050	814.568	565.706	839.491	2.7983e+06	1.48397	477.128	769.619	0.944818		33.081	1.18218e-05	110270	1.45731
2060	1598.1	4271.93	3340.32	1.11344e+07	0.781922	1898.48	1219.55	0.763122		211.038	1.89537e-05	703461
3170	2459.22	15566.8	3172.19	1.0574e+07	0.203779	1802.93	1198.74	0.487446		609.938	5.7683e-05	2.03313e+06
	230		Average		1.69976						1.17252e-05
				1400/0.0003	4.66667e+06	counts/s		figure used for JAAS paper				30000/0.0003	1e+08	counts/s		figure used for JAAS paper
